# Supplementary material for: Early transcriptional divergence underlies cell fate bias in bovine embryos
Source: bioRxiv preprint, doi:10.1101/2025.07.01.661069, version 1 (2025-07-03)
Supplement: Supplemental Data 1 [file 661069_file07.xlsx]

## Sheet: 2cell
label	SSbe	SSwe	SS	SSwe/SS
ADGRF3	3.16228	0	3.16228	0
BTBD17	3.16228	0	3.16228	0
ERICH6	3.16228	0	3.16228	0
FAM155B	3.16228	0	3.16228	0
FEZF1	3.16228	0	3.16228	0
FGA	2.53859	0	2.53859	0
GHRHR	3.16228	0	3.16228	0
GUCY2E	3.16228	0	3.16228	0
GYG2	3.16228	0	3.16228	0
HAND1	3.16228	0	3.16228	0
HIST1H4D	3.16228	0	3.16228	0
HOXC10	3.16228	0	3.16228	0
KLHL23	3.16228	0	3.16228	0
LOC100847644	3.16228	0	3.16228	0
LOC101903400	3.16228	0	3.16228	0
LOC101905162	3.16228	0	3.16228	0
LOC104969352	3.16228	0	3.16228	0
LOC104971213	3.16228	0	3.16228	0
LOC104973394	3.16228	0	3.16228	0
LOC112441505	3.16228	0	3.16228	0
LOC112442010	3.16228	0	3.16228	0
LOC112444501	3.16228	0	3.16228	0
LOC112445077	3.16228	0	3.16228	0
LOC112447033	3.16228	0	3.16228	0
LOC112448837	3.16228	0	3.16228	0
LOC112449340	3.16228	0	3.16228	0
LOC515601	3.16228	0	3.16228	0
LOC615237	3.16228	0	3.16228	0
LTA	3.16228	0	3.16228	0
MMP9	1.61015	0	1.61015	0
OTOL1	3.16228	0	3.16228	0
PATE2	3.16228	0	3.16228	0
PPP1R14D	3.16228	0	3.16228	0
PTAFR	3.16228	0	3.16228	0
ROBO3	3.16228	0	3.16228	0
SAA3	3.16228	0	3.16228	0
SCG2	3.16228	0	3.16228	0
SH2D6	3.16228	0	3.16228	0
SPPL2C	3.16228	0	3.16228	0
STMN3	3.16228	0	3.16228	0
TMEM273	3.16228	0	3.16228	0
TNNC1	3.16228	0	3.16228	0
TRPM4	3.16228	0	3.16228	0
TUBGCP6	3.16228	0	3.16228	0
LOC112447523	2.1253	0.00777818	2.13308	0.00364645
ADNCR	3.16228	0.0403051	3.20258	0.0125852
CFAP206	3.16228	0.0707107	3.23299	0.0218716
KRT28	3.16228	0.0707107	3.23299	0.0218716
LOC100847357	3.16228	0.0707107	3.23299	0.0218716
LOC100847712	3.16228	0.0707107	3.23299	0.0218716
LOC101902174	3.16228	0.0707107	3.23299	0.0218716
LOC104968982	3.16228	0.0707107	3.23299	0.0218716
LOC107133111	3.16228	0.0707107	3.23299	0.0218716
LOC112448010	3.16228	0.0707107	3.23299	0.0218716
LOC112448133	3.16228	0.0707107	3.23299	0.0218716
LOC783202	3.16228	0.0707107	3.23299	0.0218716
LOC787225	3.16228	0.0707107	3.23299	0.0218716
OSM	3.16228	0.0707107	3.23299	0.0218716
PCDH10	3.16228	0.0707107	3.23299	0.0218716
RGMA	3.16228	0.0707107	3.23299	0.0218716
SHH	3.16228	0.0707107	3.23299	0.0218716
SLC25A41	3.16228	0.0707107	3.23299	0.0218716
SLC6A6	3.16228	0.0707107	3.23299	0.0218716
THBS2	3.16228	0.0707107	3.23299	0.0218716
TNF	3.16228	0.0707107	3.23299	0.0218716
LYZ1	3.16228	0.0707107	3.23299	0.0218716
LOC100848006	3.16228	0.0707107	3.23299	0.0218716
LOC112445101	3.16228	0.0707107	3.23299	0.0218716
A4GALT	3.16228	0.0707107	3.23299	0.0218716
ABCC9	3.16228	0.0707107	3.23299	0.0218716
ACKR4	3.16228	0.0707107	3.23299	0.0218716
ACP4	3.16228	0.0707107	3.23299	0.0218716
ACRBP	3.16228	0.0707107	3.23299	0.0218716
ACSF3	3.16228	0.0707107	3.23299	0.0218716
ACVR1C	3.16228	0.0707107	3.23299	0.0218716
ADCYAP1R1	3.16228	0.0707107	3.23299	0.0218716
ADGRA1	3.16228	0.0707107	3.23299	0.0218716
ADGRB1	3.16228	0.0707107	3.23299	0.0218716
ADGRD2	3.16228	0.0707107	3.23299	0.0218716
ADH1C	3.16228	0.0707107	3.23299	0.0218716
ADORA3	3.16228	0.0707107	3.23299	0.0218716
ADRA2B	3.16228	0.0707107	3.23299	0.0218716
ADRA2C	3.16228	0.0707107	3.23299	0.0218716
AGBL1	3.16228	0.0707107	3.23299	0.0218716
AGRN	3.16228	0.0707107	3.23299	0.0218716
AHDC1	3.16228	0.0707107	3.23299	0.0218716
AJAP1	3.16228	0.0707107	3.23299	0.0218716
AKAP3	3.16228	0.0707107	3.23299	0.0218716
AKNA	3.16228	0.0707107	3.23299	0.0218716
ALS2CR12	3.16228	0.0707107	3.23299	0.0218716
AMBN	3.16228	0.0707107	3.23299	0.0218716
AMHR2	3.16228	0.0707107	3.23299	0.0218716
AMY2B	3.16228	0.0707107	3.23299	0.0218716
ANGPT2	3.16228	0.0707107	3.23299	0.0218716
ANK1	3.16228	0.0707107	3.23299	0.0218716
ANKDD1A	3.16228	0.0707107	3.23299	0.0218716
ANKMY1	3.16228	0.0707107	3.23299	0.0218716
ANKRD23	3.16228	0.0707107	3.23299	0.0218716
ANKRD29	3.16228	0.0707107	3.23299	0.0218716
ANKRD61	3.16228	0.0707107	3.23299	0.0218716
ANKUB1	3.16228	0.0707107	3.23299	0.0218716
ANPEP	3.16228	0.0707107	3.23299	0.0218716
ANXA9	3.16228	0.0707107	3.23299	0.0218716
APBA2	3.16228	0.0707107	3.23299	0.0218716
APOA4	3.16228	0.0707107	3.23299	0.0218716
APOBEC3Z2	3.16228	0.0707107	3.23299	0.0218716
AQP10	3.16228	0.0707107	3.23299	0.0218716
AQP4	3.16228	0.0707107	3.23299	0.0218716
AREG	3.16228	0.0707107	3.23299	0.0218716
ARHGAP23	3.16228	0.0707107	3.23299	0.0218716
ARHGAP6	3.16228	0.0707107	3.23299	0.0218716
ARHGDIB	3.16228	0.0707107	3.23299	0.0218716
ARHGEF17	3.16228	0.0707107	3.23299	0.0218716
ARHGEF19	3.16228	0.0707107	3.23299	0.0218716
ARL5C	3.16228	0.0707107	3.23299	0.0218716
ARMC3	3.16228	0.0707107	3.23299	0.0218716
ARMH2	3.16228	0.0707107	3.23299	0.0218716
ARSE	3.16228	0.0707107	3.23299	0.0218716
ASB10	3.16228	0.0707107	3.23299	0.0218716
ASB14	3.16228	0.0707107	3.23299	0.0218716
ASCL5	3.16228	0.0707107	3.23299	0.0218716
ATP2B2	3.16228	0.0707107	3.23299	0.0218716
ATP6V0D2	3.16228	0.0707107	3.23299	0.0218716
B3GAT2	3.16228	0.0707107	3.23299	0.0218716
B3GNT7	3.16228	0.0707107	3.23299	0.0218716
B4GALNT4	3.16228	0.0707107	3.23299	0.0218716
BATF	3.16228	0.0707107	3.23299	0.0218716
BCAM	3.16228	0.0707107	3.23299	0.0218716
BEGAIN	3.16228	0.0707107	3.23299	0.0218716
BEND6	3.16228	0.0707107	3.23299	0.0218716
BEX2	3.16228	0.0707107	3.23299	0.0218716
BFSP2	3.16228	0.0707107	3.23299	0.0218716
BHLHA9	3.16228	0.0707107	3.23299	0.0218716
BLK	3.16228	0.0707107	3.23299	0.0218716
BMX	3.16228	0.0707107	3.23299	0.0218716
BOLA-DYA	3.16228	0.0707107	3.23299	0.0218716
C11H2orf70	3.16228	0.0707107	3.23299	0.0218716
C13H20orf204	3.16228	0.0707107	3.23299	0.0218716
C15H11orf34	3.16228	0.0707107	3.23299	0.0218716
C17H22orf31	3.16228	0.0707107	3.23299	0.0218716
C18H16orf86	3.16228	0.0707107	3.23299	0.0218716
C18H19orf18	3.16228	0.0707107	3.23299	0.0218716
C1QTNF4	3.16228	0.0707107	3.23299	0.0218716
C1QTNF9	3.16228	0.0707107	3.23299	0.0218716
C21H14orf132	3.16228	0.0707107	3.23299	0.0218716
C25H16orf45	3.16228	0.0707107	3.23299	0.0218716
C25H16orf82	3.16228	0.0707107	3.23299	0.0218716
C28H10orf105	3.16228	0.0707107	3.23299	0.0218716
C2CD4B	3.16228	0.0707107	3.23299	0.0218716
C3	3.16228	0.0707107	3.23299	0.0218716
C3H1orf216	3.16228	0.0707107	3.23299	0.0218716
C4A	3.16228	0.0707107	3.23299	0.0218716
C4BPB	3.16228	0.0707107	3.23299	0.0218716
C8G	3.16228	0.0707107	3.23299	0.0218716
C8H8orf74	3.16228	0.0707107	3.23299	0.0218716
CADM2	3.16228	0.0707107	3.23299	0.0218716
CAGE1	3.16228	0.0707107	3.23299	0.0218716
CALHM2	3.16228	0.0707107	3.23299	0.0218716
CALHM6	3.16228	0.0707107	3.23299	0.0218716
CAMK2B	3.16228	0.0707107	3.23299	0.0218716
CAMK2N2	3.16228	0.0707107	3.23299	0.0218716
CAPN8	3.16228	0.0707107	3.23299	0.0218716
CASP4	3.16228	0.0707107	3.23299	0.0218716
CATSPER1	3.16228	0.0707107	3.23299	0.0218716
CATSPERE	3.16228	0.0707107	3.23299	0.0218716
CAV1	3.16228	0.0707107	3.23299	0.0218716
CBLN2	3.16228	0.0707107	3.23299	0.0218716
CCDC183	3.16228	0.0707107	3.23299	0.0218716
CCDC184	3.16228	0.0707107	3.23299	0.0218716
CCDC70	3.16228	0.0707107	3.23299	0.0218716
CCDC89	3.16228	0.0707107	3.23299	0.0218716
CCKAR	3.16228	0.0707107	3.23299	0.0218716
CCL5	3.16228	0.0707107	3.23299	0.0218716
CCND1	3.16228	0.0707107	3.23299	0.0218716
CD24	3.16228	0.0707107	3.23299	0.0218716
CD6	3.16228	0.0707107	3.23299	0.0218716
CD74	3.16228	0.0707107	3.23299	0.0218716
CD79A	3.16228	0.0707107	3.23299	0.0218716
CD96	3.16228	0.0707107	3.23299	0.0218716
CDH12	3.16228	0.0707107	3.23299	0.0218716
CDR2L	3.16228	0.0707107	3.23299	0.0218716
CEBPA	3.16228	0.0707107	3.23299	0.0218716
CEMIP	3.16228	0.0707107	3.23299	0.0218716
CES1	3.16228	0.0707107	3.23299	0.0218716
CFAP97D1	3.16228	0.0707107	3.23299	0.0218716
CGREF1	3.16228	0.0707107	3.23299	0.0218716
CGRRF1	3.16228	0.0707107	3.23299	0.0218716
CH25H	3.16228	0.0707107	3.23299	0.0218716
CHRNB4	3.16228	0.0707107	3.23299	0.0218716
CHRNG	3.16228	0.0707107	3.23299	0.0218716
CHST1	3.16228	0.0707107	3.23299	0.0218716
CKM	3.16228	0.0707107	3.23299	0.0218716
CLCN1	3.16228	0.0707107	3.23299	0.0218716
CLCNKA	3.16228	0.0707107	3.23299	0.0218716
CLEC10A	3.16228	0.0707107	3.23299	0.0218716
CLEC17A	3.16228	0.0707107	3.23299	0.0218716
CLEC4A	3.16228	0.0707107	3.23299	0.0218716
CNGA4	3.16228	0.0707107	3.23299	0.0218716
CNTNAP5	3.16228	0.0707107	3.23299	0.0218716
COL26A1	3.16228	0.0707107	3.23299	0.0218716
COL4A3	3.16228	0.0707107	3.23299	0.0218716
COL9A2	3.16228	0.0707107	3.23299	0.0218716
COL9A3	3.16228	0.0707107	3.23299	0.0218716
COLEC10	3.16228	0.0707107	3.23299	0.0218716
CPAMD8	3.16228	0.0707107	3.23299	0.0218716
CRHR1	3.16228	0.0707107	3.23299	0.0218716
CROCC2	3.16228	0.0707107	3.23299	0.0218716
CRYBB3	3.16228	0.0707107	3.23299	0.0218716
CRYGS	3.16228	0.0707107	3.23299	0.0218716
CSF2RA	3.16228	0.0707107	3.23299	0.0218716
CSN2	3.16228	0.0707107	3.23299	0.0218716
CTU1	3.16228	0.0707107	3.23299	0.0218716
CXCL10	3.16228	0.0707107	3.23299	0.0218716
CXCR1	3.16228	0.0707107	3.23299	0.0218716
CXCR2	3.16228	0.0707107	3.23299	0.0218716
CYP11A1	3.16228	0.0707107	3.23299	0.0218716
CYP19A1	3.16228	0.0707107	3.23299	0.0218716
CYP26B1	3.16228	0.0707107	3.23299	0.0218716
CYP46A1	3.16228	0.0707107	3.23299	0.0218716
DALRD3	3.16228	0.0707107	3.23299	0.0218716
DBH	3.16228	0.0707107	3.23299	0.0218716
DBIL5	3.16228	0.0707107	3.23299	0.0218716
DDN	3.16228	0.0707107	3.23299	0.0218716
DEFB132	3.16228	0.0707107	3.23299	0.0218716
DGKK	3.16228	0.0707107	3.23299	0.0218716
DHH	3.16228	0.0707107	3.23299	0.0218716
DHRS7C	3.16228	0.0707107	3.23299	0.0218716
DIRAS3	3.16228	0.0707107	3.23299	0.0218716
DMBT1	3.16228	0.0707107	3.23299	0.0218716
DMRTA2	3.16228	0.0707107	3.23299	0.0218716
DMTN	3.16228	0.0707107	3.23299	0.0218716
DNAAF1	3.16228	0.0707107	3.23299	0.0218716
DNAJB3	3.16228	0.0707107	3.23299	0.0218716
DNER	3.16228	0.0707107	3.23299	0.0218716
DNTT	3.16228	0.0707107	3.23299	0.0218716
DPEP2	3.16228	0.0707107	3.23299	0.0218716
DPEP3	3.16228	0.0707107	3.23299	0.0218716
DPYSL4	3.16228	0.0707107	3.23299	0.0218716
DRGX	3.16228	0.0707107	3.23299	0.0218716
DSC1	3.16228	0.0707107	3.23299	0.0218716
DUOX2	3.16228	0.0707107	3.23299	0.0218716
DUSP21	3.16228	0.0707107	3.23299	0.0218716
DYDC2	3.16228	0.0707107	3.23299	0.0218716
ECE2	3.16228	0.0707107	3.23299	0.0218716
ECEL1	3.16228	0.0707107	3.23299	0.0218716
EDA2R	3.16228	0.0707107	3.23299	0.0218716
EDAR	3.16228	0.0707107	3.23299	0.0218716
EFCAB9	3.16228	0.0707107	3.23299	0.0218716
EFNB3	3.16228	0.0707107	3.23299	0.0218716
EGFL7	3.16228	0.0707107	3.23299	0.0218716
ELANE	3.16228	0.0707107	3.23299	0.0218716
EMB	3.16228	0.0707107	3.23299	0.0218716
EN1	3.16228	0.0707107	3.23299	0.0218716
ENPP3	3.16228	0.0707107	3.23299	0.0218716
ENTPD2	3.16228	0.0707107	3.23299	0.0218716
EOMES	3.16228	0.0707107	3.23299	0.0218716
EPN3	3.16228	0.0707107	3.23299	0.0218716
EPPK1	3.16228	0.0707107	3.23299	0.0218716
ERMN	3.16228	0.0707107	3.23299	0.0218716
ESAM	3.16228	0.0707107	3.23299	0.0218716
ETV3L	3.16228	0.0707107	3.23299	0.0218716
EVC	3.16228	0.0707107	3.23299	0.0218716
EXTL1	3.16228	0.0707107	3.23299	0.0218716
FABP7	3.16228	0.0707107	3.23299	0.0218716
FADS2	3.16228	0.0707107	3.23299	0.0218716
FAM155A	3.16228	0.0707107	3.23299	0.0218716
FAM166B	3.16228	0.0707107	3.23299	0.0218716
FAM189A1	3.16228	0.0707107	3.23299	0.0218716
FAM216B	3.16228	0.0707107	3.23299	0.0218716
FAM229A	3.16228	0.0707107	3.23299	0.0218716
FCRLA	3.16228	0.0707107	3.23299	0.0218716
FEZF2	3.16228	0.0707107	3.23299	0.0218716
FGF8	3.16228	0.0707107	3.23299	0.0218716
FGFRL1	3.16228	0.0707107	3.23299	0.0218716
FLI1	3.16228	0.0707107	3.23299	0.0218716
FLNA	3.16228	0.0707107	3.23299	0.0218716
FLT3LG	3.16228	0.0707107	3.23299	0.0218716
FLYWCH1	3.16228	0.0707107	3.23299	0.0218716
FMO2	3.16228	0.0707107	3.23299	0.0218716
FOLR2	3.16228	0.0707107	3.23299	0.0218716
FOXB2	3.16228	0.0707107	3.23299	0.0218716
FOXD3	3.16228	0.0707107	3.23299	0.0218716
FOXE1	3.16228	0.0707107	3.23299	0.0218716
FOXL1	3.16228	0.0707107	3.23299	0.0218716
FOXL2	3.16228	0.0707107	3.23299	0.0218716
FTMT	3.16228	0.0707107	3.23299	0.0218716
FZD7	3.16228	0.0707107	3.23299	0.0218716
GABRR3	3.16228	0.0707107	3.23299	0.0218716
GALR2	3.16228	0.0707107	3.23299	0.0218716
GCGR	3.16228	0.0707107	3.23299	0.0218716
GDAP1L1	3.16228	0.0707107	3.23299	0.0218716
GDF11	3.16228	0.0707107	3.23299	0.0218716
GFRA1	3.16228	0.0707107	3.23299	0.0218716
GHRH	3.16228	0.0707107	3.23299	0.0218716
GJB1	3.16228	0.0707107	3.23299	0.0218716
GLYCTK	3.16228	0.0707107	3.23299	0.0218716
GNG8	3.16228	0.0707107	3.23299	0.0218716
GPBAR1	3.16228	0.0707107	3.23299	0.0218716
GPC6	3.16228	0.0707107	3.23299	0.0218716
GPR143	3.16228	0.0707107	3.23299	0.0218716
GPR152	3.16228	0.0707107	3.23299	0.0218716
GPR22	3.16228	0.0707107	3.23299	0.0218716
GPR31	3.16228	0.0707107	3.23299	0.0218716
GPR83	3.16228	0.0707107	3.23299	0.0218716
GPRASP1	3.16228	0.0707107	3.23299	0.0218716
GPX3	3.16228	0.0707107	3.23299	0.0218716
GRAP	3.16228	0.0707107	3.23299	0.0218716
GRIK1	3.16228	0.0707107	3.23299	0.0218716
GRK1	3.16228	0.0707107	3.23299	0.0218716
GRXCR2	3.16228	0.0707107	3.23299	0.0218716
GSG1	3.16228	0.0707107	3.23299	0.0218716
GYS2	3.16228	0.0707107	3.23299	0.0218716
HBE1	3.16228	0.0707107	3.23299	0.0218716
HBZ	3.16228	0.0707107	3.23299	0.0218716
HCRTR1	3.16228	0.0707107	3.23299	0.0218716
HCRTR2	3.16228	0.0707107	3.23299	0.0218716
HERC6	3.16228	0.0707107	3.23299	0.0218716
HES2	3.16228	0.0707107	3.23299	0.0218716
HES5	3.16228	0.0707107	3.23299	0.0218716
HGF	3.16228	0.0707107	3.23299	0.0218716
HIGD1B	3.16228	0.0707107	3.23299	0.0218716
HMX2	3.16228	0.0707107	3.23299	0.0218716
HNF1A	3.16228	0.0707107	3.23299	0.0218716
HPCAL4	3.16228	0.0707107	3.23299	0.0218716
HPD	3.16228	0.0707107	3.23299	0.0218716
HPX	3.16228	0.0707107	3.23299	0.0218716
HRH2	3.16228	0.0707107	3.23299	0.0218716
HRH3	3.16228	0.0707107	3.23299	0.0218716
HRH4	3.16228	0.0707107	3.23299	0.0218716
HS3ST1	3.16228	0.0707107	3.23299	0.0218716
HS3ST4	3.16228	0.0707107	3.23299	0.0218716
HSBP1L1	3.16228	0.0707107	3.23299	0.0218716
HSPB2	3.16228	0.0707107	3.23299	0.0218716
HSPB3	3.16228	0.0707107	3.23299	0.0218716
HYAL4	3.16228	0.0707107	3.23299	0.0218716
ID4	3.16228	0.0707107	3.23299	0.0218716
IFI27	3.16228	0.0707107	3.23299	0.0218716
IFI44L	3.16228	0.0707107	3.23299	0.0218716
IFITM10	3.16228	0.0707107	3.23299	0.0218716
IGFBP1	3.16228	0.0707107	3.23299	0.0218716
IGSF23	3.16228	0.0707107	3.23299	0.0218716
IGSF5	3.16228	0.0707107	3.23299	0.0218716
IHH	3.16228	0.0707107	3.23299	0.0218716
IKZF1	3.16228	0.0707107	3.23299	0.0218716
IL13RA2	3.16228	0.0707107	3.23299	0.0218716
IL16	3.16228	0.0707107	3.23299	0.0218716
IL17RE	3.16228	0.0707107	3.23299	0.0218716
IL1A	3.16228	0.0707107	3.23299	0.0218716
IL1F10	3.16228	0.0707107	3.23299	0.0218716
IL1RL2	3.16228	0.0707107	3.23299	0.0218716
IL22RA1	3.16228	0.0707107	3.23299	0.0218716
IL9	3.16228	0.0707107	3.23299	0.0218716
INF2	3.16228	0.0707107	3.23299	0.0218716
INSRR	3.16228	0.0707107	3.23299	0.0218716
IQCE	3.16228	0.0707107	3.23299	0.0218716
ISG15	3.16228	0.0707107	3.23299	0.0218716
ISM1	3.16228	0.0707107	3.23299	0.0218716
ISM2	3.16228	0.0707107	3.23299	0.0218716
ITGAM	3.16228	0.0707107	3.23299	0.0218716
ITGB7	3.16228	0.0707107	3.23299	0.0218716
ITK	3.16228	0.0707107	3.23299	0.0218716
ITPKB	3.16228	0.0707107	3.23299	0.0218716
JAKMIP3	3.16228	0.0707107	3.23299	0.0218716
JHY	3.16228	0.0707107	3.23299	0.0218716
JSRP1	3.16228	0.0707107	3.23299	0.0218716
JUP	3.16228	0.0707107	3.23299	0.0218716
KAZALD1	3.16228	0.0707107	3.23299	0.0218716
KCNA1	3.16228	0.0707107	3.23299	0.0218716
KCNAB3	3.16228	0.0707107	3.23299	0.0218716
KCNC1	3.16228	0.0707107	3.23299	0.0218716
KCNG4	3.16228	0.0707107	3.23299	0.0218716
KCNIP1	3.16228	0.0707107	3.23299	0.0218716
KCNIP4	3.16228	0.0707107	3.23299	0.0218716
KCNJ12	3.16228	0.0707107	3.23299	0.0218716
KCNK12	3.16228	0.0707107	3.23299	0.0218716
KCNMB3	3.16228	0.0707107	3.23299	0.0218716
KCNS1	3.16228	0.0707107	3.23299	0.0218716
KCTD14	3.16228	0.0707107	3.23299	0.0218716
KCTD8	3.16228	0.0707107	3.23299	0.0218716
KIF1A	3.16228	0.0707107	3.23299	0.0218716
KIF26A	3.16228	0.0707107	3.23299	0.0218716
KIRREL2	3.16228	0.0707107	3.23299	0.0218716
KLF9	3.16228	0.0707107	3.23299	0.0218716
KLHDC8A	3.16228	0.0707107	3.23299	0.0218716
KLHL10	3.16228	0.0707107	3.23299	0.0218716
KLHL29	3.16228	0.0707107	3.23299	0.0218716
KLKB1	3.16228	0.0707107	3.23299	0.0218716
KLRC1	3.16228	0.0707107	3.23299	0.0218716
KRT3	3.16228	0.0707107	3.23299	0.0218716
KRT42	3.16228	0.0707107	3.23299	0.0218716
KRT71	3.16228	0.0707107	3.23299	0.0218716
KRT75	3.16228	0.0707107	3.23299	0.0218716
KRT76	3.16228	0.0707107	3.23299	0.0218716
L3HYPDH	3.16228	0.0707107	3.23299	0.0218716
LAX1	3.16228	0.0707107	3.23299	0.0218716
LCN6	3.16228	0.0707107	3.23299	0.0218716
LFNG	3.16228	0.0707107	3.23299	0.0218716
LGALS12	3.16228	0.0707107	3.23299	0.0218716
LHFPL1	3.16228	0.0707107	3.23299	0.0218716
LIF	3.16228	0.0707107	3.23299	0.0218716
LIMD1	3.16228	0.0707107	3.23299	0.0218716
LINC00694	3.16228	0.0707107	3.23299	0.0218716
LINGO4	3.16228	0.0707107	3.23299	0.0218716
LIPG	3.16228	0.0707107	3.23299	0.0218716
LIPM	3.16228	0.0707107	3.23299	0.0218716
LMAN1L	3.16228	0.0707107	3.23299	0.0218716
LOC100138048	3.16228	0.0707107	3.23299	0.0218716
LOC100139363	3.16228	0.0707107	3.23299	0.0218716
LOC100139585	3.16228	0.0707107	3.23299	0.0218716
LOC100139843	3.16228	0.0707107	3.23299	0.0218716
LOC100140839	3.16228	0.0707107	3.23299	0.0218716
LOC100141258	3.16228	0.0707107	3.23299	0.0218716
LOC100295015	3.16228	0.0707107	3.23299	0.0218716
LOC100295548	3.16228	0.0707107	3.23299	0.0218716
LOC100297540	3.16228	0.0707107	3.23299	0.0218716
LOC100298021	3.16228	0.0707107	3.23299	0.0218716
LOC100299076	3.16228	0.0707107	3.23299	0.0218716
LOC100299757	3.16228	0.0707107	3.23299	0.0218716
LOC100335467	3.16228	0.0707107	3.23299	0.0218716
LOC100335514	3.16228	0.0707107	3.23299	0.0218716
LOC100335751	3.16228	0.0707107	3.23299	0.0218716
LOC100336476	3.16228	0.0707107	3.23299	0.0218716
LOC100336869	3.16228	0.0707107	3.23299	0.0218716
LOC100337044	3.16228	0.0707107	3.23299	0.0218716
LOC100847175	3.16228	0.0707107	3.23299	0.0218716
LOC100847190	3.16228	0.0707107	3.23299	0.0218716
LOC100847209	3.16228	0.0707107	3.23299	0.0218716
LOC100847326	3.16228	0.0707107	3.23299	0.0218716
LOC100847412	3.16228	0.0707107	3.23299	0.0218716
LOC100847677	3.16228	0.0707107	3.23299	0.0218716
LOC100847773	3.16228	0.0707107	3.23299	0.0218716
LOC100847861	3.16228	0.0707107	3.23299	0.0218716
LOC100847999	3.16228	0.0707107	3.23299	0.0218716
LOC100848105	3.16228	0.0707107	3.23299	0.0218716
LOC100848463	3.16228	0.0707107	3.23299	0.0218716
LOC100848517	3.16228	0.0707107	3.23299	0.0218716
LOC100848581	3.16228	0.0707107	3.23299	0.0218716
LOC100848596	3.16228	0.0707107	3.23299	0.0218716
LOC100849043	3.16228	0.0707107	3.23299	0.0218716
LOC101901900	3.16228	0.0707107	3.23299	0.0218716
LOC101901923	3.16228	0.0707107	3.23299	0.0218716
LOC101901948	3.16228	0.0707107	3.23299	0.0218716
LOC101902084	3.16228	0.0707107	3.23299	0.0218716
LOC101902228	3.16228	0.0707107	3.23299	0.0218716
LOC101902265	3.16228	0.0707107	3.23299	0.0218716
LOC101902321	3.16228	0.0707107	3.23299	0.0218716
LOC101902451	3.16228	0.0707107	3.23299	0.0218716
LOC101902793	3.16228	0.0707107	3.23299	0.0218716
LOC101902808	3.16228	0.0707107	3.23299	0.0218716
LOC101902831	3.16228	0.0707107	3.23299	0.0218716
LOC101902854	3.16228	0.0707107	3.23299	0.0218716
LOC101902856	3.16228	0.0707107	3.23299	0.0218716
LOC101902895	3.16228	0.0707107	3.23299	0.0218716
LOC101902907	3.16228	0.0707107	3.23299	0.0218716
LOC101902915	3.16228	0.0707107	3.23299	0.0218716
LOC101903036	3.16228	0.0707107	3.23299	0.0218716
LOC101903097	3.16228	0.0707107	3.23299	0.0218716
LOC101903289	3.16228	0.0707107	3.23299	0.0218716
LOC101903340	3.16228	0.0707107	3.23299	0.0218716
LOC101903383	3.16228	0.0707107	3.23299	0.0218716
LOC101903449	3.16228	0.0707107	3.23299	0.0218716
LOC101903639	3.16228	0.0707107	3.23299	0.0218716
LOC101903873	3.16228	0.0707107	3.23299	0.0218716
LOC101903877	3.16228	0.0707107	3.23299	0.0218716
LOC101903896	3.16228	0.0707107	3.23299	0.0218716
LOC101903913	3.16228	0.0707107	3.23299	0.0218716
LOC101903949	3.16228	0.0707107	3.23299	0.0218716
LOC101903992	3.16228	0.0707107	3.23299	0.0218716
LOC101904069	3.16228	0.0707107	3.23299	0.0218716
LOC101904103	3.16228	0.0707107	3.23299	0.0218716
LOC101904187	3.16228	0.0707107	3.23299	0.0218716
LOC101904265	3.16228	0.0707107	3.23299	0.0218716
LOC101904266	3.16228	0.0707107	3.23299	0.0218716
LOC101904350	3.16228	0.0707107	3.23299	0.0218716
LOC101904382	3.16228	0.0707107	3.23299	0.0218716
LOC101904383	3.16228	0.0707107	3.23299	0.0218716
LOC101904405	3.16228	0.0707107	3.23299	0.0218716
LOC101904550	3.16228	0.0707107	3.23299	0.0218716
LOC101904647	3.16228	0.0707107	3.23299	0.0218716
LOC101904656	3.16228	0.0707107	3.23299	0.0218716
LOC101904916	3.16228	0.0707107	3.23299	0.0218716
LOC101905099	3.16228	0.0707107	3.23299	0.0218716
LOC101905299	3.16228	0.0707107	3.23299	0.0218716
LOC101905390	3.16228	0.0707107	3.23299	0.0218716
LOC101905427	3.16228	0.0707107	3.23299	0.0218716
LOC101905509	3.16228	0.0707107	3.23299	0.0218716
LOC101905518	3.16228	0.0707107	3.23299	0.0218716
LOC101905556	3.16228	0.0707107	3.23299	0.0218716
LOC101905618	3.16228	0.0707107	3.23299	0.0218716
LOC101905666	3.16228	0.0707107	3.23299	0.0218716
LOC101905683	3.16228	0.0707107	3.23299	0.0218716
LOC101905897	3.16228	0.0707107	3.23299	0.0218716
LOC101905925	3.16228	0.0707107	3.23299	0.0218716
LOC101906012	3.16228	0.0707107	3.23299	0.0218716
LOC101906042	3.16228	0.0707107	3.23299	0.0218716
LOC101906048	3.16228	0.0707107	3.23299	0.0218716
LOC101906086	3.16228	0.0707107	3.23299	0.0218716
LOC101906207	3.16228	0.0707107	3.23299	0.0218716
LOC101906447	3.16228	0.0707107	3.23299	0.0218716
LOC101906588	3.16228	0.0707107	3.23299	0.0218716
LOC101906604	3.16228	0.0707107	3.23299	0.0218716
LOC101906615	3.16228	0.0707107	3.23299	0.0218716
LOC101906730	3.16228	0.0707107	3.23299	0.0218716
LOC101906971	3.16228	0.0707107	3.23299	0.0218716
LOC101907107	3.16228	0.0707107	3.23299	0.0218716
LOC101907189	3.16228	0.0707107	3.23299	0.0218716
LOC101907246	3.16228	0.0707107	3.23299	0.0218716
LOC101907275	3.16228	0.0707107	3.23299	0.0218716
LOC101907306	3.16228	0.0707107	3.23299	0.0218716
LOC101907330	3.16228	0.0707107	3.23299	0.0218716
LOC101907335	3.16228	0.0707107	3.23299	0.0218716
LOC101907348	3.16228	0.0707107	3.23299	0.0218716
LOC101907363	3.16228	0.0707107	3.23299	0.0218716
LOC101907383	3.16228	0.0707107	3.23299	0.0218716
LOC101907386	3.16228	0.0707107	3.23299	0.0218716
LOC101907491	3.16228	0.0707107	3.23299	0.0218716
LOC101907575	3.16228	0.0707107	3.23299	0.0218716
LOC101907588	3.16228	0.0707107	3.23299	0.0218716
LOC101907615	3.16228	0.0707107	3.23299	0.0218716
LOC101907688	3.16228	0.0707107	3.23299	0.0218716
LOC101907707	3.16228	0.0707107	3.23299	0.0218716
LOC101907771	3.16228	0.0707107	3.23299	0.0218716
LOC101907852	3.16228	0.0707107	3.23299	0.0218716
LOC101907913	3.16228	0.0707107	3.23299	0.0218716
LOC101907926	3.16228	0.0707107	3.23299	0.0218716
LOC101907940	3.16228	0.0707107	3.23299	0.0218716
LOC101907944	3.16228	0.0707107	3.23299	0.0218716
LOC101908039	3.16228	0.0707107	3.23299	0.0218716
LOC101908075	3.16228	0.0707107	3.23299	0.0218716
LOC101908123	3.16228	0.0707107	3.23299	0.0218716
LOC101909432	3.16228	0.0707107	3.23299	0.0218716
LOC101910153	3.16228	0.0707107	3.23299	0.0218716
LOC104968500	3.16228	0.0707107	3.23299	0.0218716
LOC104968518	3.16228	0.0707107	3.23299	0.0218716
LOC104968526	3.16228	0.0707107	3.23299	0.0218716
LOC104968724	3.16228	0.0707107	3.23299	0.0218716
LOC104968898	3.16228	0.0707107	3.23299	0.0218716
LOC104969002	3.16228	0.0707107	3.23299	0.0218716
LOC104969022	3.16228	0.0707107	3.23299	0.0218716
LOC104969050	3.16228	0.0707107	3.23299	0.0218716
LOC104969115	3.16228	0.0707107	3.23299	0.0218716
LOC104969151	3.16228	0.0707107	3.23299	0.0218716
LOC104969302	3.16228	0.0707107	3.23299	0.0218716
LOC104969390	3.16228	0.0707107	3.23299	0.0218716
LOC104969408	3.16228	0.0707107	3.23299	0.0218716
LOC104969415	3.16228	0.0707107	3.23299	0.0218716
LOC104969496	3.16228	0.0707107	3.23299	0.0218716
LOC104969639	3.16228	0.0707107	3.23299	0.0218716
LOC104969640	3.16228	0.0707107	3.23299	0.0218716
LOC104970249	3.16228	0.0707107	3.23299	0.0218716
LOC104970598	3.16228	0.0707107	3.23299	0.0218716
LOC104970610	3.16228	0.0707107	3.23299	0.0218716
LOC104970809	3.16228	0.0707107	3.23299	0.0218716
LOC104970947	3.16228	0.0707107	3.23299	0.0218716
LOC104970949	3.16228	0.0707107	3.23299	0.0218716
LOC104971159	3.16228	0.0707107	3.23299	0.0218716
LOC104971236	3.16228	0.0707107	3.23299	0.0218716
LOC104971345	3.16228	0.0707107	3.23299	0.0218716
LOC104971585	3.16228	0.0707107	3.23299	0.0218716
LOC104971683	3.16228	0.0707107	3.23299	0.0218716
LOC104971924	3.16228	0.0707107	3.23299	0.0218716
LOC104971985	3.16228	0.0707107	3.23299	0.0218716
LOC104972110	3.16228	0.0707107	3.23299	0.0218716
LOC104972252	3.16228	0.0707107	3.23299	0.0218716
LOC104972256	3.16228	0.0707107	3.23299	0.0218716
LOC104972322	3.16228	0.0707107	3.23299	0.0218716
LOC104972401	3.16228	0.0707107	3.23299	0.0218716
LOC104972658	3.16228	0.0707107	3.23299	0.0218716
LOC104972906	3.16228	0.0707107	3.23299	0.0218716
LOC104973118	3.16228	0.0707107	3.23299	0.0218716
LOC104973175	3.16228	0.0707107	3.23299	0.0218716
LOC104973215	3.16228	0.0707107	3.23299	0.0218716
LOC104973297	3.16228	0.0707107	3.23299	0.0218716
LOC104973321	3.16228	0.0707107	3.23299	0.0218716
LOC104973517	3.16228	0.0707107	3.23299	0.0218716
LOC104973680	3.16228	0.0707107	3.23299	0.0218716
LOC104973826	3.16228	0.0707107	3.23299	0.0218716
LOC104973848	3.16228	0.0707107	3.23299	0.0218716
LOC104973965	3.16228	0.0707107	3.23299	0.0218716
LOC104973989	3.16228	0.0707107	3.23299	0.0218716
LOC104974070	3.16228	0.0707107	3.23299	0.0218716
LOC104974100	3.16228	0.0707107	3.23299	0.0218716
LOC104974119	3.16228	0.0707107	3.23299	0.0218716
LOC104974191	3.16228	0.0707107	3.23299	0.0218716
LOC104974222	3.16228	0.0707107	3.23299	0.0218716
LOC104974223	3.16228	0.0707107	3.23299	0.0218716
LOC104974237	3.16228	0.0707107	3.23299	0.0218716
LOC104974340	3.16228	0.0707107	3.23299	0.0218716
LOC104974451	3.16228	0.0707107	3.23299	0.0218716
LOC104974567	3.16228	0.0707107	3.23299	0.0218716
LOC104974641	3.16228	0.0707107	3.23299	0.0218716
LOC104974770	3.16228	0.0707107	3.23299	0.0218716
LOC104974899	3.16228	0.0707107	3.23299	0.0218716
LOC104974912	3.16228	0.0707107	3.23299	0.0218716
LOC104974928	3.16228	0.0707107	3.23299	0.0218716
LOC104975064	3.16228	0.0707107	3.23299	0.0218716
LOC104975124	3.16228	0.0707107	3.23299	0.0218716
LOC104975170	3.16228	0.0707107	3.23299	0.0218716
LOC104975192	3.16228	0.0707107	3.23299	0.0218716
LOC104975213	3.16228	0.0707107	3.23299	0.0218716
LOC104975232	3.16228	0.0707107	3.23299	0.0218716
LOC104975442	3.16228	0.0707107	3.23299	0.0218716
LOC104975492	3.16228	0.0707107	3.23299	0.0218716
LOC104975528	3.16228	0.0707107	3.23299	0.0218716
LOC104975936	3.16228	0.0707107	3.23299	0.0218716
LOC104976146	3.16228	0.0707107	3.23299	0.0218716
LOC104976281	3.16228	0.0707107	3.23299	0.0218716
LOC107131209	3.16228	0.0707107	3.23299	0.0218716
LOC107131225	3.16228	0.0707107	3.23299	0.0218716
LOC107131390	3.16228	0.0707107	3.23299	0.0218716
LOC107131416	3.16228	0.0707107	3.23299	0.0218716
LOC107131434	3.16228	0.0707107	3.23299	0.0218716
LOC107131469	3.16228	0.0707107	3.23299	0.0218716
LOC107131516	3.16228	0.0707107	3.23299	0.0218716
LOC107131544	3.16228	0.0707107	3.23299	0.0218716
LOC107131547	3.16228	0.0707107	3.23299	0.0218716
LOC107131573	3.16228	0.0707107	3.23299	0.0218716
LOC107131597	3.16228	0.0707107	3.23299	0.0218716
LOC107131601	3.16228	0.0707107	3.23299	0.0218716
LOC107131631	3.16228	0.0707107	3.23299	0.0218716
LOC107131659	3.16228	0.0707107	3.23299	0.0218716
LOC107131660	3.16228	0.0707107	3.23299	0.0218716
LOC107131710	3.16228	0.0707107	3.23299	0.0218716
LOC107131716	3.16228	0.0707107	3.23299	0.0218716
LOC107131763	3.16228	0.0707107	3.23299	0.0218716
LOC107131779	3.16228	0.0707107	3.23299	0.0218716
LOC107131795	3.16228	0.0707107	3.23299	0.0218716
LOC107131810	3.16228	0.0707107	3.23299	0.0218716
LOC107132284	3.16228	0.0707107	3.23299	0.0218716
LOC107132300	3.16228	0.0707107	3.23299	0.0218716
LOC107132398	3.16228	0.0707107	3.23299	0.0218716
LOC107132452	3.16228	0.0707107	3.23299	0.0218716
LOC107132508	3.16228	0.0707107	3.23299	0.0218716
LOC107132515	3.16228	0.0707107	3.23299	0.0218716
LOC107132531	3.16228	0.0707107	3.23299	0.0218716
LOC107132639	3.16228	0.0707107	3.23299	0.0218716
LOC107132740	3.16228	0.0707107	3.23299	0.0218716
LOC107132759	3.16228	0.0707107	3.23299	0.0218716
LOC107132770	3.16228	0.0707107	3.23299	0.0218716
LOC107132803	3.16228	0.0707107	3.23299	0.0218716
LOC107132852	3.16228	0.0707107	3.23299	0.0218716
LOC107132993	3.16228	0.0707107	3.23299	0.0218716
LOC107133045	3.16228	0.0707107	3.23299	0.0218716
LOC107133049	3.16228	0.0707107	3.23299	0.0218716
LOC107133209	3.16228	0.0707107	3.23299	0.0218716
LOC112441452	3.16228	0.0707107	3.23299	0.0218716
LOC112441469	3.16228	0.0707107	3.23299	0.0218716
LOC112441483	3.16228	0.0707107	3.23299	0.0218716
LOC112441518	3.16228	0.0707107	3.23299	0.0218716
LOC112441540	3.16228	0.0707107	3.23299	0.0218716
LOC112441542	3.16228	0.0707107	3.23299	0.0218716
LOC112441543	3.16228	0.0707107	3.23299	0.0218716
LOC112441601	3.16228	0.0707107	3.23299	0.0218716
LOC112441622	3.16228	0.0707107	3.23299	0.0218716
LOC112441642	3.16228	0.0707107	3.23299	0.0218716
LOC112441651	3.16228	0.0707107	3.23299	0.0218716
LOC112441717	3.16228	0.0707107	3.23299	0.0218716
LOC112441769	3.16228	0.0707107	3.23299	0.0218716
LOC112441773	3.16228	0.0707107	3.23299	0.0218716
LOC112441779	3.16228	0.0707107	3.23299	0.0218716
LOC112441793	3.16228	0.0707107	3.23299	0.0218716
LOC112441794	3.16228	0.0707107	3.23299	0.0218716
LOC112441797	3.16228	0.0707107	3.23299	0.0218716
LOC112441830	3.16228	0.0707107	3.23299	0.0218716
LOC112441847	3.16228	0.0707107	3.23299	0.0218716
LOC112441867	3.16228	0.0707107	3.23299	0.0218716
LOC112441881	3.16228	0.0707107	3.23299	0.0218716
LOC112442032	3.16228	0.0707107	3.23299	0.0218716
LOC112442037	3.16228	0.0707107	3.23299	0.0218716
LOC112442075	3.16228	0.0707107	3.23299	0.0218716
LOC112442297	3.16228	0.0707107	3.23299	0.0218716
LOC112442306	3.16228	0.0707107	3.23299	0.0218716
LOC112442330	3.16228	0.0707107	3.23299	0.0218716
LOC112442375	3.16228	0.0707107	3.23299	0.0218716
LOC112442402	3.16228	0.0707107	3.23299	0.0218716
LOC112442404	3.16228	0.0707107	3.23299	0.0218716
LOC112442537	3.16228	0.0707107	3.23299	0.0218716
LOC112442544	3.16228	0.0707107	3.23299	0.0218716
LOC112442553	3.16228	0.0707107	3.23299	0.0218716
LOC112442556	3.16228	0.0707107	3.23299	0.0218716
LOC112442577	3.16228	0.0707107	3.23299	0.0218716
LOC112442595	3.16228	0.0707107	3.23299	0.0218716
LOC112442596	3.16228	0.0707107	3.23299	0.0218716
LOC112442626	3.16228	0.0707107	3.23299	0.0218716
LOC112442661	3.16228	0.0707107	3.23299	0.0218716
LOC112442678	3.16228	0.0707107	3.23299	0.0218716
LOC112442681	3.16228	0.0707107	3.23299	0.0218716
LOC112442683	3.16228	0.0707107	3.23299	0.0218716
LOC112442698	3.16228	0.0707107	3.23299	0.0218716
LOC112442709	3.16228	0.0707107	3.23299	0.0218716
LOC112442720	3.16228	0.0707107	3.23299	0.0218716
LOC112442721	3.16228	0.0707107	3.23299	0.0218716
LOC112442741	3.16228	0.0707107	3.23299	0.0218716
LOC112442743	3.16228	0.0707107	3.23299	0.0218716
LOC112442750	3.16228	0.0707107	3.23299	0.0218716
LOC112442981	3.16228	0.0707107	3.23299	0.0218716
LOC112442992	3.16228	0.0707107	3.23299	0.0218716
LOC112443007	3.16228	0.0707107	3.23299	0.0218716
LOC112443015	3.16228	0.0707107	3.23299	0.0218716
LOC112443117	3.16228	0.0707107	3.23299	0.0218716
LOC112443123	3.16228	0.0707107	3.23299	0.0218716
LOC112443142	3.16228	0.0707107	3.23299	0.0218716
LOC112443147	3.16228	0.0707107	3.23299	0.0218716
LOC112443153	3.16228	0.0707107	3.23299	0.0218716
LOC112443170	3.16228	0.0707107	3.23299	0.0218716
LOC112443176	3.16228	0.0707107	3.23299	0.0218716
LOC112443178	3.16228	0.0707107	3.23299	0.0218716
LOC112443185	3.16228	0.0707107	3.23299	0.0218716
LOC112443198	3.16228	0.0707107	3.23299	0.0218716
LOC112443206	3.16228	0.0707107	3.23299	0.0218716
LOC112443208	3.16228	0.0707107	3.23299	0.0218716
LOC112443219	3.16228	0.0707107	3.23299	0.0218716
LOC112443223	3.16228	0.0707107	3.23299	0.0218716
LOC112443231	3.16228	0.0707107	3.23299	0.0218716
LOC112443325	3.16228	0.0707107	3.23299	0.0218716
LOC112443445	3.16228	0.0707107	3.23299	0.0218716
LOC112443449	3.16228	0.0707107	3.23299	0.0218716
LOC112443454	3.16228	0.0707107	3.23299	0.0218716
LOC112443460	3.16228	0.0707107	3.23299	0.0218716
LOC112443469	3.16228	0.0707107	3.23299	0.0218716
LOC112443476	3.16228	0.0707107	3.23299	0.0218716
LOC112443489	3.16228	0.0707107	3.23299	0.0218716
LOC112443493	3.16228	0.0707107	3.23299	0.0218716
LOC112443510	3.16228	0.0707107	3.23299	0.0218716
LOC112443512	3.16228	0.0707107	3.23299	0.0218716
LOC112443632	3.16228	0.0707107	3.23299	0.0218716
LOC112443704	3.16228	0.0707107	3.23299	0.0218716
LOC112443736	3.16228	0.0707107	3.23299	0.0218716
LOC112443749	3.16228	0.0707107	3.23299	0.0218716
LOC112443778	3.16228	0.0707107	3.23299	0.0218716
LOC112443820	3.16228	0.0707107	3.23299	0.0218716
LOC112443847	3.16228	0.0707107	3.23299	0.0218716
LOC112443863	3.16228	0.0707107	3.23299	0.0218716
LOC112443881	3.16228	0.0707107	3.23299	0.0218716
LOC112444147	3.16228	0.0707107	3.23299	0.0218716
LOC112444159	3.16228	0.0707107	3.23299	0.0218716
LOC112444168	3.16228	0.0707107	3.23299	0.0218716
LOC112444170	3.16228	0.0707107	3.23299	0.0218716
LOC112444181	3.16228	0.0707107	3.23299	0.0218716
LOC112444192	3.16228	0.0707107	3.23299	0.0218716
LOC112444193	3.16228	0.0707107	3.23299	0.0218716
LOC112444198	3.16228	0.0707107	3.23299	0.0218716
LOC112444281	3.16228	0.0707107	3.23299	0.0218716
LOC112444307	3.16228	0.0707107	3.23299	0.0218716
LOC112444320	3.16228	0.0707107	3.23299	0.0218716
LOC112444333	3.16228	0.0707107	3.23299	0.0218716
LOC112444342	3.16228	0.0707107	3.23299	0.0218716
LOC112444459	3.16228	0.0707107	3.23299	0.0218716
LOC112444463	3.16228	0.0707107	3.23299	0.0218716
LOC112444479	3.16228	0.0707107	3.23299	0.0218716
LOC112444481	3.16228	0.0707107	3.23299	0.0218716
LOC112444488	3.16228	0.0707107	3.23299	0.0218716
LOC112444493	3.16228	0.0707107	3.23299	0.0218716
LOC112444502	3.16228	0.0707107	3.23299	0.0218716
LOC112444503	3.16228	0.0707107	3.23299	0.0218716
LOC112444504	3.16228	0.0707107	3.23299	0.0218716
LOC112444510	3.16228	0.0707107	3.23299	0.0218716
LOC112444515	3.16228	0.0707107	3.23299	0.0218716
LOC112444585	3.16228	0.0707107	3.23299	0.0218716
LOC112444587	3.16228	0.0707107	3.23299	0.0218716
LOC112444598	3.16228	0.0707107	3.23299	0.0218716
LOC112444625	3.16228	0.0707107	3.23299	0.0218716
LOC112444631	3.16228	0.0707107	3.23299	0.0218716
LOC112444649	3.16228	0.0707107	3.23299	0.0218716
LOC112444733	3.16228	0.0707107	3.23299	0.0218716
LOC112444752	3.16228	0.0707107	3.23299	0.0218716
LOC112444757	3.16228	0.0707107	3.23299	0.0218716
LOC112444859	3.16228	0.0707107	3.23299	0.0218716
LOC112444883	3.16228	0.0707107	3.23299	0.0218716
LOC112444888	3.16228	0.0707107	3.23299	0.0218716
LOC112444892	3.16228	0.0707107	3.23299	0.0218716
LOC112444897	3.16228	0.0707107	3.23299	0.0218716
LOC112444915	3.16228	0.0707107	3.23299	0.0218716
LOC112444928	3.16228	0.0707107	3.23299	0.0218716
LOC112445003	3.16228	0.0707107	3.23299	0.0218716
LOC112445011	3.16228	0.0707107	3.23299	0.0218716
LOC112445033	3.16228	0.0707107	3.23299	0.0218716
LOC112445050	3.16228	0.0707107	3.23299	0.0218716
LOC112445089	3.16228	0.0707107	3.23299	0.0218716
LOC112445091	3.16228	0.0707107	3.23299	0.0218716
LOC112445119	3.16228	0.0707107	3.23299	0.0218716
LOC112445134	3.16228	0.0707107	3.23299	0.0218716
LOC112445143	3.16228	0.0707107	3.23299	0.0218716
LOC112445165	3.16228	0.0707107	3.23299	0.0218716
LOC112445167	3.16228	0.0707107	3.23299	0.0218716
LOC112445200	3.16228	0.0707107	3.23299	0.0218716
LOC112445864	3.16228	0.0707107	3.23299	0.0218716
LOC112445872	3.16228	0.0707107	3.23299	0.0218716
LOC112445879	3.16228	0.0707107	3.23299	0.0218716
LOC112445983	3.16228	0.0707107	3.23299	0.0218716
LOC112445994	3.16228	0.0707107	3.23299	0.0218716
LOC112446001	3.16228	0.0707107	3.23299	0.0218716
LOC112446003	3.16228	0.0707107	3.23299	0.0218716
LOC112446024	3.16228	0.0707107	3.23299	0.0218716
LOC112446030	3.16228	0.0707107	3.23299	0.0218716
LOC112446039	3.16228	0.0707107	3.23299	0.0218716
LOC112446042	3.16228	0.0707107	3.23299	0.0218716
LOC112446116	3.16228	0.0707107	3.23299	0.0218716
LOC112446322	3.16228	0.0707107	3.23299	0.0218716
LOC112446334	3.16228	0.0707107	3.23299	0.0218716
LOC112446351	3.16228	0.0707107	3.23299	0.0218716
LOC112446352	3.16228	0.0707107	3.23299	0.0218716
LOC112446364	3.16228	0.0707107	3.23299	0.0218716
LOC112446387	3.16228	0.0707107	3.23299	0.0218716
LOC112446391	3.16228	0.0707107	3.23299	0.0218716
LOC112446394	3.16228	0.0707107	3.23299	0.0218716
LOC112446416	3.16228	0.0707107	3.23299	0.0218716
LOC112446429	3.16228	0.0707107	3.23299	0.0218716
LOC112446463	3.16228	0.0707107	3.23299	0.0218716
LOC112446642	3.16228	0.0707107	3.23299	0.0218716
LOC112446645	3.16228	0.0707107	3.23299	0.0218716
LOC112446709	3.16228	0.0707107	3.23299	0.0218716
LOC112446720	3.16228	0.0707107	3.23299	0.0218716
LOC112446721	3.16228	0.0707107	3.23299	0.0218716
LOC112446762	3.16228	0.0707107	3.23299	0.0218716
LOC112446991	3.16228	0.0707107	3.23299	0.0218716
LOC112447039	3.16228	0.0707107	3.23299	0.0218716
LOC112447044	3.16228	0.0707107	3.23299	0.0218716
LOC112447071	3.16228	0.0707107	3.23299	0.0218716
LOC112447123	3.16228	0.0707107	3.23299	0.0218716
LOC112447133	3.16228	0.0707107	3.23299	0.0218716
LOC112447146	3.16228	0.0707107	3.23299	0.0218716
LOC112447150	3.16228	0.0707107	3.23299	0.0218716
LOC112447319	3.16228	0.0707107	3.23299	0.0218716
LOC112447322	3.16228	0.0707107	3.23299	0.0218716
LOC112447323	3.16228	0.0707107	3.23299	0.0218716
LOC112447327	3.16228	0.0707107	3.23299	0.0218716
LOC112447332	3.16228	0.0707107	3.23299	0.0218716
LOC112447337	3.16228	0.0707107	3.23299	0.0218716
LOC112447338	3.16228	0.0707107	3.23299	0.0218716
LOC112447349	3.16228	0.0707107	3.23299	0.0218716
LOC112447364	3.16228	0.0707107	3.23299	0.0218716
LOC112447372	3.16228	0.0707107	3.23299	0.0218716
LOC112447388	3.16228	0.0707107	3.23299	0.0218716
LOC112447446	3.16228	0.0707107	3.23299	0.0218716
LOC112447457	3.16228	0.0707107	3.23299	0.0218716
LOC112447491	3.16228	0.0707107	3.23299	0.0218716
LOC112447494	3.16228	0.0707107	3.23299	0.0218716
LOC112447506	3.16228	0.0707107	3.23299	0.0218716
LOC112447530	3.16228	0.0707107	3.23299	0.0218716
LOC112447537	3.16228	0.0707107	3.23299	0.0218716
LOC112447543	3.16228	0.0707107	3.23299	0.0218716
LOC112447565	3.16228	0.0707107	3.23299	0.0218716
LOC112447726	3.16228	0.0707107	3.23299	0.0218716
LOC112447773	3.16228	0.0707107	3.23299	0.0218716
LOC112447775	3.16228	0.0707107	3.23299	0.0218716
LOC112447779	3.16228	0.0707107	3.23299	0.0218716
LOC112447791	3.16228	0.0707107	3.23299	0.0218716
LOC112447819	3.16228	0.0707107	3.23299	0.0218716
LOC112447825	3.16228	0.0707107	3.23299	0.0218716
LOC112447829	3.16228	0.0707107	3.23299	0.0218716
LOC112447831	3.16228	0.0707107	3.23299	0.0218716
LOC112447845	3.16228	0.0707107	3.23299	0.0218716
LOC112447859	3.16228	0.0707107	3.23299	0.0218716
LOC112447887	3.16228	0.0707107	3.23299	0.0218716
LOC112447895	3.16228	0.0707107	3.23299	0.0218716
LOC112448022	3.16228	0.0707107	3.23299	0.0218716
LOC112448026	3.16228	0.0707107	3.23299	0.0218716
LOC112448059	3.16228	0.0707107	3.23299	0.0218716
LOC112448074	3.16228	0.0707107	3.23299	0.0218716
LOC112448079	3.16228	0.0707107	3.23299	0.0218716
LOC112448141	3.16228	0.0707107	3.23299	0.0218716
LOC112448265	3.16228	0.0707107	3.23299	0.0218716
LOC112448342	3.16228	0.0707107	3.23299	0.0218716
LOC112448362	3.16228	0.0707107	3.23299	0.0218716
LOC112448433	3.16228	0.0707107	3.23299	0.0218716
LOC112448510	3.16228	0.0707107	3.23299	0.0218716
LOC112448512	3.16228	0.0707107	3.23299	0.0218716
LOC112448515	3.16228	0.0707107	3.23299	0.0218716
LOC112448534	3.16228	0.0707107	3.23299	0.0218716
LOC112448556	3.16228	0.0707107	3.23299	0.0218716
LOC112448560	3.16228	0.0707107	3.23299	0.0218716
LOC112448567	3.16228	0.0707107	3.23299	0.0218716
LOC112448581	3.16228	0.0707107	3.23299	0.0218716
LOC112448735	3.16228	0.0707107	3.23299	0.0218716
LOC112448736	3.16228	0.0707107	3.23299	0.0218716
LOC112448743	3.16228	0.0707107	3.23299	0.0218716
LOC112448762	3.16228	0.0707107	3.23299	0.0218716
LOC112448778	3.16228	0.0707107	3.23299	0.0218716
LOC112448792	3.16228	0.0707107	3.23299	0.0218716
LOC112448807	3.16228	0.0707107	3.23299	0.0218716
LOC112448817	3.16228	0.0707107	3.23299	0.0218716
LOC112448825	3.16228	0.0707107	3.23299	0.0218716
LOC112448828	3.16228	0.0707107	3.23299	0.0218716
LOC112448854	3.16228	0.0707107	3.23299	0.0218716
LOC112449027	3.16228	0.0707107	3.23299	0.0218716
LOC112449033	3.16228	0.0707107	3.23299	0.0218716
LOC112449037	3.16228	0.0707107	3.23299	0.0218716
LOC112449052	3.16228	0.0707107	3.23299	0.0218716
LOC112449053	3.16228	0.0707107	3.23299	0.0218716
LOC112449070	3.16228	0.0707107	3.23299	0.0218716
LOC112449072	3.16228	0.0707107	3.23299	0.0218716
LOC112449076	3.16228	0.0707107	3.23299	0.0218716
LOC112449080	3.16228	0.0707107	3.23299	0.0218716
LOC112449101	3.16228	0.0707107	3.23299	0.0218716
LOC112449115	3.16228	0.0707107	3.23299	0.0218716
LOC112449235	3.16228	0.0707107	3.23299	0.0218716
LOC112449239	3.16228	0.0707107	3.23299	0.0218716
LOC112449248	3.16228	0.0707107	3.23299	0.0218716
LOC112449249	3.16228	0.0707107	3.23299	0.0218716
LOC112449261	3.16228	0.0707107	3.23299	0.0218716
LOC112449268	3.16228	0.0707107	3.23299	0.0218716
LOC112449276	3.16228	0.0707107	3.23299	0.0218716
LOC112449284	3.16228	0.0707107	3.23299	0.0218716
LOC112449315	3.16228	0.0707107	3.23299	0.0218716
LOC112449329	3.16228	0.0707107	3.23299	0.0218716
LOC112449332	3.16228	0.0707107	3.23299	0.0218716
LOC112449337	3.16228	0.0707107	3.23299	0.0218716
LOC112449338	3.16228	0.0707107	3.23299	0.0218716
LOC112449341	3.16228	0.0707107	3.23299	0.0218716
LOC112449345	3.16228	0.0707107	3.23299	0.0218716
LOC112449359	3.16228	0.0707107	3.23299	0.0218716
LOC112449365	3.16228	0.0707107	3.23299	0.0218716
LOC112449375	3.16228	0.0707107	3.23299	0.0218716
LOC112449380	3.16228	0.0707107	3.23299	0.0218716
LOC112449505	3.16228	0.0707107	3.23299	0.0218716
LOC112449512	3.16228	0.0707107	3.23299	0.0218716
LOC112449543	3.16228	0.0707107	3.23299	0.0218716
LOC112449615	3.16228	0.0707107	3.23299	0.0218716
LOC504858	3.16228	0.0707107	3.23299	0.0218716
LOC505972	3.16228	0.0707107	3.23299	0.0218716
LOC506202	3.16228	0.0707107	3.23299	0.0218716
LOC506707	3.16228	0.0707107	3.23299	0.0218716
LOC507247	3.16228	0.0707107	3.23299	0.0218716
LOC508646	3.16228	0.0707107	3.23299	0.0218716
LOC508820	3.16228	0.0707107	3.23299	0.0218716
LOC508834	3.16228	0.0707107	3.23299	0.0218716
LOC509761	3.16228	0.0707107	3.23299	0.0218716
LOC510100	3.16228	0.0707107	3.23299	0.0218716
LOC510185	3.16228	0.0707107	3.23299	0.0218716
LOC510257	3.16228	0.0707107	3.23299	0.0218716
LOC510901	3.16228	0.0707107	3.23299	0.0218716
LOC511400	3.16228	0.0707107	3.23299	0.0218716
LOC513659	3.16228	0.0707107	3.23299	0.0218716
LOC514662	3.16228	0.0707107	3.23299	0.0218716
LOC515000	3.16228	0.0707107	3.23299	0.0218716
LOC516849	3.16228	0.0707107	3.23299	0.0218716
LOC516870	3.16228	0.0707107	3.23299	0.0218716
LOC517016	3.16228	0.0707107	3.23299	0.0218716
LOC518422	3.16228	0.0707107	3.23299	0.0218716
LOC519161	3.16228	0.0707107	3.23299	0.0218716
LOC519309	3.16228	0.0707107	3.23299	0.0218716
LOC520336	3.16228	0.0707107	3.23299	0.0218716
LOC521656	3.16228	0.0707107	3.23299	0.0218716
LOC523458	3.16228	0.0707107	3.23299	0.0218716
LOC523631	3.16228	0.0707107	3.23299	0.0218716
LOC523963	3.16228	0.0707107	3.23299	0.0218716
LOC525033	3.16228	0.0707107	3.23299	0.0218716
LOC525415	3.16228	0.0707107	3.23299	0.0218716
LOC526226	3.16228	0.0707107	3.23299	0.0218716
LOC526769	3.16228	0.0707107	3.23299	0.0218716
LOC527068	3.16228	0.0707107	3.23299	0.0218716
LOC527384	3.16228	0.0707107	3.23299	0.0218716
LOC528262	3.16228	0.0707107	3.23299	0.0218716
LOC528767	3.16228	0.0707107	3.23299	0.0218716
LOC529488	3.16228	0.0707107	3.23299	0.0218716
LOC529657	3.16228	0.0707107	3.23299	0.0218716
LOC530077	3.16228	0.0707107	3.23299	0.0218716
LOC531038	3.16228	0.0707107	3.23299	0.0218716
LOC532207	3.16228	0.0707107	3.23299	0.0218716
LOC536739	3.16228	0.0707107	3.23299	0.0218716
LOC613699	3.16228	0.0707107	3.23299	0.0218716
LOC614376	3.16228	0.0707107	3.23299	0.0218716
LOC615040	3.16228	0.0707107	3.23299	0.0218716
LOC615663	3.16228	0.0707107	3.23299	0.0218716
LOC615989	3.16228	0.0707107	3.23299	0.0218716
LOC616538	3.16228	0.0707107	3.23299	0.0218716
LOC616911	3.16228	0.0707107	3.23299	0.0218716
LOC616948	3.16228	0.0707107	3.23299	0.0218716
LOC617648	3.16228	0.0707107	3.23299	0.0218716
LOC617833	3.16228	0.0707107	3.23299	0.0218716
LOC618112	3.16228	0.0707107	3.23299	0.0218716
LOC781146	3.16228	0.0707107	3.23299	0.0218716
LOC781192	3.16228	0.0707107	3.23299	0.0218716
LOC781304	3.16228	0.0707107	3.23299	0.0218716
LOC781663	3.16228	0.0707107	3.23299	0.0218716
LOC781948	3.16228	0.0707107	3.23299	0.0218716
LOC783380	3.16228	0.0707107	3.23299	0.0218716
LOC783533	3.16228	0.0707107	3.23299	0.0218716
LOC783616	3.16228	0.0707107	3.23299	0.0218716
LOC784052	3.16228	0.0707107	3.23299	0.0218716
LOC784187	3.16228	0.0707107	3.23299	0.0218716
LOC785981	3.16228	0.0707107	3.23299	0.0218716
LOC786065	3.16228	0.0707107	3.23299	0.0218716
LOC786139	3.16228	0.0707107	3.23299	0.0218716
LOC786386	3.16228	0.0707107	3.23299	0.0218716
LOC786489	3.16228	0.0707107	3.23299	0.0218716
LOC786928	3.16228	0.0707107	3.23299	0.0218716
LOC787891	3.16228	0.0707107	3.23299	0.0218716
LOC788150	3.16228	0.0707107	3.23299	0.0218716
LOC788425	3.16228	0.0707107	3.23299	0.0218716
LOC789018	3.16228	0.0707107	3.23299	0.0218716
LOC789144	3.16228	0.0707107	3.23299	0.0218716
LOC789358	3.16228	0.0707107	3.23299	0.0218716
LRFN4	3.16228	0.0707107	3.23299	0.0218716
LRRC14B	3.16228	0.0707107	3.23299	0.0218716
LRRC56	3.16228	0.0707107	3.23299	0.0218716
LRRC75A	3.16228	0.0707107	3.23299	0.0218716
LRRD1	3.16228	0.0707107	3.23299	0.0218716
LSAMP	3.16228	0.0707107	3.23299	0.0218716
LTB4R	3.16228	0.0707107	3.23299	0.0218716
LTB4R2	3.16228	0.0707107	3.23299	0.0218716
LYVE1	3.16228	0.0707107	3.23299	0.0218716
LYZL4	3.16228	0.0707107	3.23299	0.0218716
LYZL6	3.16228	0.0707107	3.23299	0.0218716
MAGED4B	3.16228	0.0707107	3.23299	0.0218716
MAP1LC3C	3.16228	0.0707107	3.23299	0.0218716
MBD3L3	3.16228	0.0707107	3.23299	0.0218716
MEF2B	3.16228	0.0707107	3.23299	0.0218716
METTL27	3.16228	0.0707107	3.23299	0.0218716
MGC127133	3.16228	0.0707107	3.23299	0.0218716
MGC137454	3.16228	0.0707107	3.23299	0.0218716
MGC139164	3.16228	0.0707107	3.23299	0.0218716
MGLL	3.16228	0.0707107	3.23299	0.0218716
MIC1	3.16228	0.0707107	3.23299	0.0218716
MISP	3.16228	0.0707107	3.23299	0.0218716
MKRN3	3.16228	0.0707107	3.23299	0.0218716
MLC1	3.16228	0.0707107	3.23299	0.0218716
MLXIPL	3.16228	0.0707107	3.23299	0.0218716
MMP24	3.16228	0.0707107	3.23299	0.0218716
MMP28	3.16228	0.0707107	3.23299	0.0218716
MOCOS	3.16228	0.0707107	3.23299	0.0218716
MORN3	3.16228	0.0707107	3.23299	0.0218716
MPL	3.16228	0.0707107	3.23299	0.0218716
MPP4	3.16228	0.0707107	3.23299	0.0218716
MPPED1	3.16228	0.0707107	3.23299	0.0218716
MRGPRF	3.16228	0.0707107	3.23299	0.0218716
MSLN	3.16228	0.0707107	3.23299	0.0218716
MSRA	3.16228	0.0707107	3.23299	0.0218716
MSS51	3.16228	0.0707107	3.23299	0.0218716
MUSTN1	3.16228	0.0707107	3.23299	0.0218716
MYBPC1	3.16228	0.0707107	3.23299	0.0218716
MYBPC3	3.16228	0.0707107	3.23299	0.0218716
MYBPH	3.16228	0.0707107	3.23299	0.0218716
MYL5	3.16228	0.0707107	3.23299	0.0218716
MYMX	3.16228	0.0707107	3.23299	0.0218716
MYT1L	3.16228	0.0707107	3.23299	0.0218716
NAB2	3.16228	0.0707107	3.23299	0.0218716
NAT8L	3.16228	0.0707107	3.23299	0.0218716
NCF4	3.16228	0.0707107	3.23299	0.0218716
NECTIN2	3.16228	0.0707107	3.23299	0.0218716
NHLRC1	3.16228	0.0707107	3.23299	0.0218716
NINJ2	3.16228	0.0707107	3.23299	0.0218716
NKG7	3.16228	0.0707107	3.23299	0.0218716
NKPD1	3.16228	0.0707107	3.23299	0.0218716
NKX2-4	3.16228	0.0707107	3.23299	0.0218716
NKX2-8	3.16228	0.0707107	3.23299	0.0218716
NLRC3	3.16228	0.0707107	3.23299	0.0218716
NOXO1	3.16228	0.0707107	3.23299	0.0218716
NOXRED1	3.16228	0.0707107	3.23299	0.0218716
NPBWR1	3.16228	0.0707107	3.23299	0.0218716
NPFFR2	3.16228	0.0707107	3.23299	0.0218716
NPPB	3.16228	0.0707107	3.23299	0.0218716
NR1D2	3.16228	0.0707107	3.23299	0.0218716
NR2F6	3.16228	0.0707107	3.23299	0.0218716
NRTN	3.16228	0.0707107	3.23299	0.0218716
NT5DC4	3.16228	0.0707107	3.23299	0.0218716
OFCC1	3.16228	0.0707107	3.23299	0.0218716
OLIG3	3.16228	0.0707107	3.23299	0.0218716
OMG	3.16228	0.0707107	3.23299	0.0218716
OPLAH	3.16228	0.0707107	3.23299	0.0218716
OR2A14	3.16228	0.0707107	3.23299	0.0218716
OR2D3	3.16228	0.0707107	3.23299	0.0218716
OR4D9	3.16228	0.0707107	3.23299	0.0218716
OSCAR	3.16228	0.0707107	3.23299	0.0218716
OTOA	3.16228	0.0707107	3.23299	0.0218716
P2RX2	3.16228	0.0707107	3.23299	0.0218716
P2RY8	3.16228	0.0707107	3.23299	0.0218716
PABPC1L2A	3.16228	0.0707107	3.23299	0.0218716
PAG9	3.16228	0.0707107	3.23299	0.0218716
PCDH12	3.16228	0.0707107	3.23299	0.0218716
PCDHB11	3.16228	0.0707107	3.23299	0.0218716
PCED1B	3.16228	0.0707107	3.23299	0.0218716
PCP2	3.16228	0.0707107	3.23299	0.0218716
PDCD1	3.16228	0.0707107	3.23299	0.0218716
PDZK1IP1	3.16228	0.0707107	3.23299	0.0218716
PEAR1	3.16228	0.0707107	3.23299	0.0218716
PGGHG	3.16228	0.0707107	3.23299	0.0218716
PGLYRP3	3.16228	0.0707107	3.23299	0.0218716
PGR	3.16228	0.0707107	3.23299	0.0218716
PHGR1	3.16228	0.0707107	3.23299	0.0218716
PHYHIP	3.16228	0.0707107	3.23299	0.0218716
PHYKPL	3.16228	0.0707107	3.23299	0.0218716
PI15	3.16228	0.0707107	3.23299	0.0218716
PIK3IP1	3.16228	0.0707107	3.23299	0.0218716
PLA2G1B	3.16228	0.0707107	3.23299	0.0218716
PLA2G2C	3.16228	0.0707107	3.23299	0.0218716
PLA2G2D1	3.16228	0.0707107	3.23299	0.0218716
PLA2G4E	3.16228	0.0707107	3.23299	0.0218716
PLEKHS1	3.16228	0.0707107	3.23299	0.0218716
PLIN5	3.16228	0.0707107	3.23299	0.0218716
PLOD1	3.16228	0.0707107	3.23299	0.0218716
PLSCR5	3.16228	0.0707107	3.23299	0.0218716
PMFBP1	3.16228	0.0707107	3.23299	0.0218716
PNMA6E	3.16228	0.0707107	3.23299	0.0218716
PPP1R3B	3.16228	0.0707107	3.23299	0.0218716
PQLC1	3.16228	0.0707107	3.23299	0.0218716
PRAC2	3.16228	0.0707107	3.23299	0.0218716
PRDM7	3.16228	0.0707107	3.23299	0.0218716
PRG3	3.16228	0.0707107	3.23299	0.0218716
PRKAG3	3.16228	0.0707107	3.23299	0.0218716
PRKAR1B	3.16228	0.0707107	3.23299	0.0218716
PRKCB	3.16228	0.0707107	3.23299	0.0218716
PRLR	3.16228	0.0707107	3.23299	0.0218716
PRND	3.16228	0.0707107	3.23299	0.0218716
PROC	3.16228	0.0707107	3.23299	0.0218716
PROZ	3.16228	0.0707107	3.23299	0.0218716
PRR22	3.16228	0.0707107	3.23299	0.0218716
PRRX2	3.16228	0.0707107	3.23299	0.0218716
PRSS12	3.16228	0.0707107	3.23299	0.0218716
PRSS46P	3.16228	0.0707107	3.23299	0.0218716
PRSS50	3.16228	0.0707107	3.23299	0.0218716
PSMB11	3.16228	0.0707107	3.23299	0.0218716
PTGER2	3.16228	0.0707107	3.23299	0.0218716
PTGER4	3.16228	0.0707107	3.23299	0.0218716
PTPRC	3.16228	0.0707107	3.23299	0.0218716
PTPRH	3.16228	0.0707107	3.23299	0.0218716
QPRT	3.16228	0.0707107	3.23299	0.0218716
RAB42	3.16228	0.0707107	3.23299	0.0218716
RARRES2	3.16228	0.0707107	3.23299	0.0218716
RASGEF1C	3.16228	0.0707107	3.23299	0.0218716
RASL10A	3.16228	0.0707107	3.23299	0.0218716
RASSF2	3.16228	0.0707107	3.23299	0.0218716
RBBP8NL	3.16228	0.0707107	3.23299	0.0218716
RDH5	3.16228	0.0707107	3.23299	0.0218716
REN	3.16228	0.0707107	3.23299	0.0218716
REP15	3.16228	0.0707107	3.23299	0.0218716
RFX8	3.16228	0.0707107	3.23299	0.0218716
RGS11	3.16228	0.0707107	3.23299	0.0218716
RHPN1	3.16228	0.0707107	3.23299	0.0218716
RIMBP3B	3.16228	0.0707107	3.23299	0.0218716
RIN3	3.16228	0.0707107	3.23299	0.0218716
RINL	3.16228	0.0707107	3.23299	0.0218716
RMRP	3.16228	0.0707107	3.23299	0.0218716
RNF144A	3.16228	0.0707107	3.23299	0.0218716
RNF152	3.16228	0.0707107	3.23299	0.0218716
RP1L1	3.16228	0.0707107	3.23299	0.0218716
RRH	3.16228	0.0707107	3.23299	0.0218716
RUNDC3A	3.16228	0.0707107	3.23299	0.0218716
SAMD13	3.16228	0.0707107	3.23299	0.0218716
SCN7A	3.16228	0.0707107	3.23299	0.0218716
SCNN1B	3.16228	0.0707107	3.23299	0.0218716
SCRT1	3.16228	0.0707107	3.23299	0.0218716
SCUBE1	3.16228	0.0707107	3.23299	0.0218716
SEC14L5	3.16228	0.0707107	3.23299	0.0218716
SEC14L6	3.16228	0.0707107	3.23299	0.0218716
SERPINA1	3.16228	0.0707107	3.23299	0.0218716
SERPINA3-7	3.16228	0.0707107	3.23299	0.0218716
SEZ6L2	3.16228	0.0707107	3.23299	0.0218716
SFRP4	3.16228	0.0707107	3.23299	0.0218716
SFTA2	3.16228	0.0707107	3.23299	0.0218716
SFTPC	3.16228	0.0707107	3.23299	0.0218716
SH2D1A	3.16228	0.0707107	3.23299	0.0218716
SH2D3A	3.16228	0.0707107	3.23299	0.0218716
SH3D21	3.16228	0.0707107	3.23299	0.0218716
SIAH3	3.16228	0.0707107	3.23299	0.0218716
SIGLEC15	3.16228	0.0707107	3.23299	0.0218716
SIRPB1	3.16228	0.0707107	3.23299	0.0218716
SIRPB2	3.16228	0.0707107	3.23299	0.0218716
SLAMF9	3.16228	0.0707107	3.23299	0.0218716
SLC13A5	3.16228	0.0707107	3.23299	0.0218716
SLC14A2	3.16228	0.0707107	3.23299	0.0218716
SLC15A2	3.16228	0.0707107	3.23299	0.0218716
SLC15A3	3.16228	0.0707107	3.23299	0.0218716
SLC16A6	3.16228	0.0707107	3.23299	0.0218716
SLC18A1	3.16228	0.0707107	3.23299	0.0218716
SLC22A3	3.16228	0.0707107	3.23299	0.0218716
SLC22A4	3.16228	0.0707107	3.23299	0.0218716
SLC25A34	3.16228	0.0707107	3.23299	0.0218716
SLC26A3	3.16228	0.0707107	3.23299	0.0218716
SLC26A7	3.16228	0.0707107	3.23299	0.0218716
SLC27A5	3.16228	0.0707107	3.23299	0.0218716
SLC2A10	3.16228	0.0707107	3.23299	0.0218716
SLC2A13	3.16228	0.0707107	3.23299	0.0218716
SLC30A2	3.16228	0.0707107	3.23299	0.0218716
SLC30A8	3.16228	0.0707107	3.23299	0.0218716
SLC34A3	3.16228	0.0707107	3.23299	0.0218716
SLC35D2	3.16228	0.0707107	3.23299	0.0218716
SLC37A1	3.16228	0.0707107	3.23299	0.0218716
SLC37A2	3.16228	0.0707107	3.23299	0.0218716
SLC4A5	3.16228	0.0707107	3.23299	0.0218716
SLC52A3	3.16228	0.0707107	3.23299	0.0218716
SLC5A12	3.16228	0.0707107	3.23299	0.0218716
SLC5A2	3.16228	0.0707107	3.23299	0.0218716
SLC5A5	3.16228	0.0707107	3.23299	0.0218716
SLC6A3	3.16228	0.0707107	3.23299	0.0218716
SLC9A3R2	3.16228	0.0707107	3.23299	0.0218716
SLCO4A1	3.16228	0.0707107	3.23299	0.0218716
SLCO6A1	3.16228	0.0707107	3.23299	0.0218716
SLFN14	3.16228	0.0707107	3.23299	0.0218716
SLITRK5	3.16228	0.0707107	3.23299	0.0218716
SLURP1	3.16228	0.0707107	3.23299	0.0218716
SMCO2	3.16228	0.0707107	3.23299	0.0218716
SMPD1	3.16228	0.0707107	3.23299	0.0218716
SMTNL1	3.16228	0.0707107	3.23299	0.0218716
SNAI2	3.16228	0.0707107	3.23299	0.0218716
SNCG	3.16228	0.0707107	3.23299	0.0218716
SNHG12	3.16228	0.0707107	3.23299	0.0218716
SORCS2	3.16228	0.0707107	3.23299	0.0218716
SOX10	3.16228	0.0707107	3.23299	0.0218716
SP100	3.16228	0.0707107	3.23299	0.0218716
SPACA5	3.16228	0.0707107	3.23299	0.0218716
SPATA13	3.16228	0.0707107	3.23299	0.0218716
SPATA45	3.16228	0.0707107	3.23299	0.0218716
SPEM1	3.16228	0.0707107	3.23299	0.0218716
ST6GALNAC1	3.16228	0.0707107	3.23299	0.0218716
ST6GALNAC5	3.16228	0.0707107	3.23299	0.0218716
ST8SIA1	3.16228	0.0707107	3.23299	0.0218716
STARD5	3.16228	0.0707107	3.23299	0.0218716
STPG4	3.16228	0.0707107	3.23299	0.0218716
STRA8	3.16228	0.0707107	3.23299	0.0218716
STX10	3.16228	0.0707107	3.23299	0.0218716
STX1B	3.16228	0.0707107	3.23299	0.0218716
SULT1C3	3.16228	0.0707107	3.23299	0.0218716
SULT1C4	3.16228	0.0707107	3.23299	0.0218716
SYP	3.16228	0.0707107	3.23299	0.0218716
SYT8	3.16228	0.0707107	3.23299	0.0218716
TAAR3	3.16228	0.0707107	3.23299	0.0218716
TBC1D10C	3.16228	0.0707107	3.23299	0.0218716
TEF	3.16228	0.0707107	3.23299	0.0218716
TEX13B	3.16228	0.0707107	3.23299	0.0218716
TEX49	3.16228	0.0707107	3.23299	0.0218716
TFF3	3.16228	0.0707107	3.23299	0.0218716
TGM2	3.16228	0.0707107	3.23299	0.0218716
TIGD3	3.16228	0.0707107	3.23299	0.0218716
TLR9	3.16228	0.0707107	3.23299	0.0218716
TLX2	3.16228	0.0707107	3.23299	0.0218716
TM6SF2	3.16228	0.0707107	3.23299	0.0218716
TMCO5B	3.16228	0.0707107	3.23299	0.0218716
TMEM102	3.16228	0.0707107	3.23299	0.0218716
TMEM136	3.16228	0.0707107	3.23299	0.0218716
TMEM150B	3.16228	0.0707107	3.23299	0.0218716
TMEM151A	3.16228	0.0707107	3.23299	0.0218716
TMEM184A	3.16228	0.0707107	3.23299	0.0218716
TMEM253	3.16228	0.0707107	3.23299	0.0218716
TMEM61	3.16228	0.0707107	3.23299	0.0218716
TMEM79	3.16228	0.0707107	3.23299	0.0218716
TMEM95	3.16228	0.0707107	3.23299	0.0218716
TMPPE	3.16228	0.0707107	3.23299	0.0218716
TMPRSS15	3.16228	0.0707107	3.23299	0.0218716
TMPRSS4	3.16228	0.0707107	3.23299	0.0218716
TMPRSS5	3.16228	0.0707107	3.23299	0.0218716
TNFAIP6	3.16228	0.0707107	3.23299	0.0218716
TNFSF13B	3.16228	0.0707107	3.23299	0.0218716
TNIP2	3.16228	0.0707107	3.23299	0.0218716
TNNI3	3.16228	0.0707107	3.23299	0.0218716
TNNT2	3.16228	0.0707107	3.23299	0.0218716
TPD52L3	3.16228	0.0707107	3.23299	0.0218716
TRAPPC6A	3.16228	0.0707107	3.23299	0.0218716
TREML2	3.16228	0.0707107	3.23299	0.0218716
TRIM17	3.16228	0.0707107	3.23299	0.0218716
TRIM29	3.16228	0.0707107	3.23299	0.0218716
TRIM40	3.16228	0.0707107	3.23299	0.0218716
TRIM46	3.16228	0.0707107	3.23299	0.0218716
TRIM48	3.16228	0.0707107	3.23299	0.0218716
TRIM72	3.16228	0.0707107	3.23299	0.0218716
TSHB	3.16228	0.0707107	3.23299	0.0218716
TTLL8	3.16228	0.0707107	3.23299	0.0218716
TTYH2	3.16228	0.0707107	3.23299	0.0218716
TUBAL3	3.16228	0.0707107	3.23299	0.0218716
TUBB1	3.16228	0.0707107	3.23299	0.0218716
UFSP1	3.16228	0.0707107	3.23299	0.0218716
UGT3A2	3.16228	0.0707107	3.23299	0.0218716
UMODL1	3.16228	0.0707107	3.23299	0.0218716
UNC45B	3.16228	0.0707107	3.23299	0.0218716
UNC5CL	3.16228	0.0707107	3.23299	0.0218716
UPK3BL1	3.16228	0.0707107	3.23299	0.0218716
VASN	3.16228	0.0707107	3.23299	0.0218716
VTN	3.16228	0.0707107	3.23299	0.0218716
WBP1	3.16228	0.0707107	3.23299	0.0218716
WDR88	3.16228	0.0707107	3.23299	0.0218716
WFDC2	3.16228	0.0707107	3.23299	0.0218716
WISP1	3.16228	0.0707107	3.23299	0.0218716
WNT16	3.16228	0.0707107	3.23299	0.0218716
WNT9B	3.16228	0.0707107	3.23299	0.0218716
ZACN	3.16228	0.0707107	3.23299	0.0218716
ZBTB7C	3.16228	0.0707107	3.23299	0.0218716
ZFYVE28	3.16228	0.0707107	3.23299	0.0218716
ZG16	3.16228	0.0707107	3.23299	0.0218716
ZNF114	3.16228	0.0707107	3.23299	0.0218716
ZNF185	3.16228	0.0707107	3.23299	0.0218716
ZNF296	3.16228	0.0707107	3.23299	0.0218716
ZNF316	3.16228	0.0707107	3.23299	0.0218716
ZNF48	3.16228	0.0707107	3.23299	0.0218716
ZNF554	3.16228	0.0707107	3.23299	0.0218716
ZNF580	3.16228	0.0707107	3.23299	0.0218716
ZNF784	3.16228	0.0707107	3.23299	0.0218716
RAB33A	3.16228	0.0707107	3.23299	0.0218716
ZNF389	3.16228	0.0799031	3.24218	0.0246449
LOC107131840	2.53859	0.0707107	2.6093	0.0270995
SNCB	2.53859	0.0707107	2.6093	0.0270995
ACOT12	2.24983	0.0707107	2.32054	0.0304717
CCDC17	2.24983	0.0707107	2.32054	0.0304717
CERS6	2.24983	0.0707107	2.32054	0.0304717
DCT	2.24983	0.0707107	2.32054	0.0304717
DNAJB8	2.24983	0.0707107	2.32054	0.0304717
FAM131B	2.24983	0.0707107	2.32054	0.0304717
FCRLB	2.24983	0.0707107	2.32054	0.0304717
GJA9	2.24983	0.0707107	2.32054	0.0304717
HDAC4	2.24983	0.0707107	2.32054	0.0304717
IGSF8	2.24983	0.0707107	2.32054	0.0304717
INSL5	2.24983	0.0707107	2.32054	0.0304717
IRX3	2.24983	0.0707107	2.32054	0.0304717
LOC101904355	2.24983	0.0707107	2.32054	0.0304717
LOC101904878	2.24983	0.0707107	2.32054	0.0304717
LOC101906195	2.24983	0.0707107	2.32054	0.0304717
LOC101906363	2.24983	0.0707107	2.32054	0.0304717
LOC101906850	2.24983	0.0707107	2.32054	0.0304717
LOC104974648	2.24983	0.0707107	2.32054	0.0304717
LOC104975004	2.24983	0.0707107	2.32054	0.0304717
LOC104975445	2.24983	0.0707107	2.32054	0.0304717
LOC107132916	2.24983	0.0707107	2.32054	0.0304717
LOC112444581	2.24983	0.0707107	2.32054	0.0304717
LOC112446324	2.24983	0.0707107	2.32054	0.0304717
LOC112446350	2.24983	0.0707107	2.32054	0.0304717
LOC112446676	2.24983	0.0707107	2.32054	0.0304717
LOC112447300	2.24983	0.0707107	2.32054	0.0304717
LOC112448562	2.24983	0.0707107	2.32054	0.0304717
LOC783210	2.24983	0.0707107	2.32054	0.0304717
LOC789231	2.24983	0.0707107	2.32054	0.0304717
MSMB	2.24983	0.0707107	2.32054	0.0304717
PAX2	2.24983	0.0707107	2.32054	0.0304717
PLCD4	2.24983	0.0707107	2.32054	0.0304717
RNF183	2.24983	0.0707107	2.32054	0.0304717
SH3BGR	2.24983	0.0707107	2.32054	0.0304717
TIGD5	2.24983	0.0707107	2.32054	0.0304717
TMEM173	2.24983	0.0707107	2.32054	0.0304717
TNFAIP2	2.24983	0.0707107	2.32054	0.0304717
TRIL	2.24983	0.0707107	2.32054	0.0304717
ZBTB12	2.24983	0.0707107	2.32054	0.0304717
ZNF628	2.24983	0.0707107	2.32054	0.0304717
FAR2	1.69967	0.0707107	1.77038	0.0399409
LOC100847917	3.16228	0.141421	3.3037	0.042807
ENDOU	3.16228	0.141421	3.3037	0.042807
ACER1	3.16228	0.141421	3.3037	0.042807
ACKR1	3.16228	0.141421	3.3037	0.042807
ACP7	3.16228	0.141421	3.3037	0.042807
ACSM5	3.16228	0.141421	3.3037	0.042807
ADAMTSL2	3.16228	0.141421	3.3037	0.042807
ADIPOQ	3.16228	0.141421	3.3037	0.042807
AIF1L	3.16228	0.141421	3.3037	0.042807
ANGPTL5	3.16228	0.141421	3.3037	0.042807
ANKRD33B	3.16228	0.141421	3.3037	0.042807
APOL3	3.16228	0.141421	3.3037	0.042807
ATP2A1	3.16228	0.141421	3.3037	0.042807
B3GAT1	3.16228	0.141421	3.3037	0.042807
BEND2	3.16228	0.141421	3.3037	0.042807
BEST4	3.16228	0.141421	3.3037	0.042807
BOLA	3.16228	0.141421	3.3037	0.042807
C13H20orf173	3.16228	0.141421	3.3037	0.042807
C1H21orf62	3.16228	0.141421	3.3037	0.042807
CACNA1G	3.16228	0.141421	3.3037	0.042807
CALHM4	3.16228	0.141421	3.3037	0.042807
CCDC198	3.16228	0.141421	3.3037	0.042807
CD14	3.16228	0.141421	3.3037	0.042807
CD80	3.16228	0.141421	3.3037	0.042807
CFAP299	3.16228	0.141421	3.3037	0.042807
CFAP74	3.16228	0.141421	3.3037	0.042807
CLEC14A	3.16228	0.141421	3.3037	0.042807
CNR1	3.16228	0.141421	3.3037	0.042807
COL6A2	3.16228	0.141421	3.3037	0.042807
CTXN2	3.16228	0.141421	3.3037	0.042807
CWH43	3.16228	0.141421	3.3037	0.042807
CXCR3	3.16228	0.141421	3.3037	0.042807
DCSTAMP	3.16228	0.141421	3.3037	0.042807
DEGS2	3.16228	0.141421	3.3037	0.042807
DHRS7	3.16228	0.141421	3.3037	0.042807
EDN1	3.16228	0.141421	3.3037	0.042807
ELAC1	3.16228	0.141421	3.3037	0.042807
EPHA5	3.16228	0.141421	3.3037	0.042807
FAM170B	3.16228	0.141421	3.3037	0.042807
FBXO39	3.16228	0.141421	3.3037	0.042807
FUT4	3.16228	0.141421	3.3037	0.042807
GABRA2	3.16228	0.141421	3.3037	0.042807
GAPDHS	3.16228	0.141421	3.3037	0.042807
GAS2L2	3.16228	0.141421	3.3037	0.042807
GATA6	3.16228	0.141421	3.3037	0.042807
GBP4	3.16228	0.141421	3.3037	0.042807
GH1	3.16228	0.141421	3.3037	0.042807
GIPR	3.16228	0.141421	3.3037	0.042807
GJC3	3.16228	0.141421	3.3037	0.042807
GSC2	3.16228	0.141421	3.3037	0.042807
GUCA1A	3.16228	0.141421	3.3037	0.042807
HAVCR1	3.16228	0.141421	3.3037	0.042807
HEYL	3.16228	0.141421	3.3037	0.042807
HFM1	3.16228	0.141421	3.3037	0.042807
HOXB5	3.16228	0.141421	3.3037	0.042807
HOXB8	3.16228	0.141421	3.3037	0.042807
HTR1A	3.16228	0.141421	3.3037	0.042807
HTR3A	3.16228	0.141421	3.3037	0.042807
HTRA4	3.16228	0.141421	3.3037	0.042807
IDUA	3.16228	0.141421	3.3037	0.042807
IFNG	3.16228	0.141421	3.3037	0.042807
IL17RC	3.16228	0.141421	3.3037	0.042807
IL21R	3.16228	0.141421	3.3037	0.042807
IL9R	3.16228	0.141421	3.3037	0.042807
INPP5D	3.16228	0.141421	3.3037	0.042807
ITGB1BP2	3.16228	0.141421	3.3037	0.042807
KCNIP2	3.16228	0.141421	3.3037	0.042807
KCNJ9	3.16228	0.141421	3.3037	0.042807
KLK10	3.16228	0.141421	3.3037	0.042807
KLK15	3.16228	0.141421	3.3037	0.042807
LCK	3.16228	0.141421	3.3037	0.042807
LDHD	3.16228	0.141421	3.3037	0.042807
LEP	3.16228	0.141421	3.3037	0.042807
LGI3	3.16228	0.141421	3.3037	0.042807
LIPC	3.16228	0.141421	3.3037	0.042807
LOC100138271	3.16228	0.141421	3.3037	0.042807
LOC100140403	3.16228	0.141421	3.3037	0.042807
LOC100295922	3.16228	0.141421	3.3037	0.042807
LOC100298658	3.16228	0.141421	3.3037	0.042807
LOC100849865	3.16228	0.141421	3.3037	0.042807
LOC101902751	3.16228	0.141421	3.3037	0.042807
LOC101903385	3.16228	0.141421	3.3037	0.042807
LOC101903404	3.16228	0.141421	3.3037	0.042807
LOC101903510	3.16228	0.141421	3.3037	0.042807
LOC101903620	3.16228	0.141421	3.3037	0.042807
LOC101903645	3.16228	0.141421	3.3037	0.042807
LOC101903891	3.16228	0.141421	3.3037	0.042807
LOC101904050	3.16228	0.141421	3.3037	0.042807
LOC101904128	3.16228	0.141421	3.3037	0.042807
LOC101904324	3.16228	0.141421	3.3037	0.042807
LOC101904552	3.16228	0.141421	3.3037	0.042807
LOC101904701	3.16228	0.141421	3.3037	0.042807
LOC101905583	3.16228	0.141421	3.3037	0.042807
LOC101906110	3.16228	0.141421	3.3037	0.042807
LOC101906818	3.16228	0.141421	3.3037	0.042807
LOC101907241	3.16228	0.141421	3.3037	0.042807
LOC101907242	3.16228	0.141421	3.3037	0.042807
LOC101907250	3.16228	0.141421	3.3037	0.042807
LOC101907540	3.16228	0.141421	3.3037	0.042807
LOC101907639	3.16228	0.141421	3.3037	0.042807
LOC101907894	3.16228	0.141421	3.3037	0.042807
LOC101908286	3.16228	0.141421	3.3037	0.042807
LOC104970906	3.16228	0.141421	3.3037	0.042807
LOC104971030	3.16228	0.141421	3.3037	0.042807
LOC104971070	3.16228	0.141421	3.3037	0.042807
LOC104971960	3.16228	0.141421	3.3037	0.042807
LOC104972569	3.16228	0.141421	3.3037	0.042807
LOC104974057	3.16228	0.141421	3.3037	0.042807
LOC104974562	3.16228	0.141421	3.3037	0.042807
LOC104974837	3.16228	0.141421	3.3037	0.042807
LOC104974945	3.16228	0.141421	3.3037	0.042807
LOC104975516	3.16228	0.141421	3.3037	0.042807
LOC107131272	3.16228	0.141421	3.3037	0.042807
LOC107131341	3.16228	0.141421	3.3037	0.042807
LOC107131465	3.16228	0.141421	3.3037	0.042807
LOC107131694	3.16228	0.141421	3.3037	0.042807
LOC107131971	3.16228	0.141421	3.3037	0.042807
LOC107131974	3.16228	0.141421	3.3037	0.042807
LOC107132092	3.16228	0.141421	3.3037	0.042807
LOC107132205	3.16228	0.141421	3.3037	0.042807
LOC107132371	3.16228	0.141421	3.3037	0.042807
LOC107132619	3.16228	0.141421	3.3037	0.042807
LOC107132678	3.16228	0.141421	3.3037	0.042807
LOC107132991	3.16228	0.141421	3.3037	0.042807
LOC107133463	3.16228	0.141421	3.3037	0.042807
LOC112442254	3.16228	0.141421	3.3037	0.042807
LOC112442350	3.16228	0.141421	3.3037	0.042807
LOC112442369	3.16228	0.141421	3.3037	0.042807
LOC112442401	3.16228	0.141421	3.3037	0.042807
LOC112442651	3.16228	0.141421	3.3037	0.042807
LOC112443127	3.16228	0.141421	3.3037	0.042807
LOC112443138	3.16228	0.141421	3.3037	0.042807
LOC112443141	3.16228	0.141421	3.3037	0.042807
LOC112443148	3.16228	0.141421	3.3037	0.042807
LOC112443242	3.16228	0.141421	3.3037	0.042807
LOC112443422	3.16228	0.141421	3.3037	0.042807
LOC112443438	3.16228	0.141421	3.3037	0.042807
LOC112443495	3.16228	0.141421	3.3037	0.042807
LOC112444306	3.16228	0.141421	3.3037	0.042807
LOC112444776	3.16228	0.141421	3.3037	0.042807
LOC112444865	3.16228	0.141421	3.3037	0.042807
LOC112444889	3.16228	0.141421	3.3037	0.042807
LOC112444894	3.16228	0.141421	3.3037	0.042807
LOC112445024	3.16228	0.141421	3.3037	0.042807
LOC112445026	3.16228	0.141421	3.3037	0.042807
LOC112445100	3.16228	0.141421	3.3037	0.042807
LOC112445115	3.16228	0.141421	3.3037	0.042807
LOC112445197	3.16228	0.141421	3.3037	0.042807
LOC112446363	3.16228	0.141421	3.3037	0.042807
LOC112446389	3.16228	0.141421	3.3037	0.042807
LOC112446402	3.16228	0.141421	3.3037	0.042807
LOC112446405	3.16228	0.141421	3.3037	0.042807
LOC112446644	3.16228	0.141421	3.3037	0.042807
LOC112446706	3.16228	0.141421	3.3037	0.042807
LOC112446712	3.16228	0.141421	3.3037	0.042807
LOC112446764	3.16228	0.141421	3.3037	0.042807
LOC112446783	3.16228	0.141421	3.3037	0.042807
LOC112447112	3.16228	0.141421	3.3037	0.042807
LOC112447148	3.16228	0.141421	3.3037	0.042807
LOC112447569	3.16228	0.141421	3.3037	0.042807
LOC112447810	3.16228	0.141421	3.3037	0.042807
LOC112448055	3.16228	0.141421	3.3037	0.042807
LOC112448056	3.16228	0.141421	3.3037	0.042807
LOC112448086	3.16228	0.141421	3.3037	0.042807
LOC112448531	3.16228	0.141421	3.3037	0.042807
LOC112449066	3.16228	0.141421	3.3037	0.042807
LOC112449279	3.16228	0.141421	3.3037	0.042807
LOC112449295	3.16228	0.141421	3.3037	0.042807
LOC112449385	3.16228	0.141421	3.3037	0.042807
LOC112449513	3.16228	0.141421	3.3037	0.042807
LOC112449520	3.16228	0.141421	3.3037	0.042807
LOC112449539	3.16228	0.141421	3.3037	0.042807
LOC112449547	3.16228	0.141421	3.3037	0.042807
LOC505918	3.16228	0.141421	3.3037	0.042807
LOC507767	3.16228	0.141421	3.3037	0.042807
LOC510351	3.16228	0.141421	3.3037	0.042807
LOC522609	3.16228	0.141421	3.3037	0.042807
LOC529277	3.16228	0.141421	3.3037	0.042807
LOC531097	3.16228	0.141421	3.3037	0.042807
LOC539064	3.16228	0.141421	3.3037	0.042807
LOC539383	3.16228	0.141421	3.3037	0.042807
LOC613401	3.16228	0.141421	3.3037	0.042807
LOC617783	3.16228	0.141421	3.3037	0.042807
LOC618733	3.16228	0.141421	3.3037	0.042807
LOC784148	3.16228	0.141421	3.3037	0.042807
LOC785216	3.16228	0.141421	3.3037	0.042807
LOC785500	3.16228	0.141421	3.3037	0.042807
LOC789121	3.16228	0.141421	3.3037	0.042807
LOC790201	3.16228	0.141421	3.3037	0.042807
LRP8	3.16228	0.141421	3.3037	0.042807
LRRC19	3.16228	0.141421	3.3037	0.042807
LTF	3.16228	0.141421	3.3037	0.042807
LYPD3	3.16228	0.141421	3.3037	0.042807
MEIG1	3.16228	0.141421	3.3037	0.042807
MEIOB	3.16228	0.141421	3.3037	0.042807
MID1IP1	3.16228	0.141421	3.3037	0.042807
MINDY4B	3.16228	0.141421	3.3037	0.042807
MIOX	3.16228	0.141421	3.3037	0.042807
MMP14	3.16228	0.141421	3.3037	0.042807
MOGAT2	3.16228	0.141421	3.3037	0.042807
MS4A2	3.16228	0.141421	3.3037	0.042807
MUC19	3.16228	0.141421	3.3037	0.042807
MYLK4	3.16228	0.141421	3.3037	0.042807
MYORG	3.16228	0.141421	3.3037	0.042807
NAT8	3.16228	0.141421	3.3037	0.042807
NPY5R	3.16228	0.141421	3.3037	0.042807
NR0B2	3.16228	0.141421	3.3037	0.042807
NRGN	3.16228	0.141421	3.3037	0.042807
OAZ3	3.16228	0.141421	3.3037	0.042807
OLFML3	3.16228	0.141421	3.3037	0.042807
OPRK1	3.16228	0.141421	3.3037	0.042807
OR1L3	3.16228	0.141421	3.3037	0.042807
OR2A2	3.16228	0.141421	3.3037	0.042807
OR52B2	3.16228	0.141421	3.3037	0.042807
OR5C1	3.16228	0.141421	3.3037	0.042807
P3H2	3.16228	0.141421	3.3037	0.042807
PACRG	3.16228	0.141421	3.3037	0.042807
PCSK2	3.16228	0.141421	3.3037	0.042807
PCSK4	3.16228	0.141421	3.3037	0.042807
PDC	3.16228	0.141421	3.3037	0.042807
PDGFRL	3.16228	0.141421	3.3037	0.042807
PLA2G4B	3.16228	0.141421	3.3037	0.042807
PLXNB3	3.16228	0.141421	3.3037	0.042807
PM20D2	3.16228	0.141421	3.3037	0.042807
PPDPFL	3.16228	0.141421	3.3037	0.042807
PTH1R	3.16228	0.141421	3.3037	0.042807
PTX4	3.16228	0.141421	3.3037	0.042807
R3HDML	3.16228	0.141421	3.3037	0.042807
RANBP3L	3.16228	0.141421	3.3037	0.042807
RHBDL1	3.16228	0.141421	3.3037	0.042807
RHOJ	3.16228	0.141421	3.3037	0.042807
RNF165	3.16228	0.141421	3.3037	0.042807
RPTN	3.16228	0.141421	3.3037	0.042807
RUSC2	3.16228	0.141421	3.3037	0.042807
SERPINB8	3.16228	0.141421	3.3037	0.042807
SLAMF8	3.16228	0.141421	3.3037	0.042807
SMCO1	3.16228	0.141421	3.3037	0.042807
SMPD3	3.16228	0.141421	3.3037	0.042807
SOWAHC	3.16228	0.141421	3.3037	0.042807
SP140	3.16228	0.141421	3.3037	0.042807
SPATA18	3.16228	0.141421	3.3037	0.042807
SPDEF	3.16228	0.141421	3.3037	0.042807
SPN	3.16228	0.141421	3.3037	0.042807
SRL	3.16228	0.141421	3.3037	0.042807
ST8SIA4	3.16228	0.141421	3.3037	0.042807
STX19	3.16228	0.141421	3.3037	0.042807
SULT2B1	3.16228	0.141421	3.3037	0.042807
SV2B	3.16228	0.141421	3.3037	0.042807
SYPL2	3.16228	0.141421	3.3037	0.042807
TAS1R1	3.16228	0.141421	3.3037	0.042807
TBX3	3.16228	0.141421	3.3037	0.042807
TCF24	3.16228	0.141421	3.3037	0.042807
TEX28	3.16228	0.141421	3.3037	0.042807
TICAM1	3.16228	0.141421	3.3037	0.042807
TMEM130	3.16228	0.141421	3.3037	0.042807
TMEM200A	3.16228	0.141421	3.3037	0.042807
TMEM200C	3.16228	0.141421	3.3037	0.042807
TMEM229A	3.16228	0.141421	3.3037	0.042807
TMEM246	3.16228	0.141421	3.3037	0.042807
TRIM10	3.16228	0.141421	3.3037	0.042807
TRIM54	3.16228	0.141421	3.3037	0.042807
TRPM3	3.16228	0.141421	3.3037	0.042807
TSPAN6	3.16228	0.141421	3.3037	0.042807
VXN	3.16228	0.141421	3.3037	0.042807
WC-7	3.16228	0.141421	3.3037	0.042807
WC1.3	3.16228	0.141421	3.3037	0.042807
XIST	3.16228	0.141421	3.3037	0.042807
XKR4	3.16228	0.141421	3.3037	0.042807
XKR6	3.16228	0.141421	3.3037	0.042807
ZDBF2	3.16228	0.141421	3.3037	0.042807
ZNF469	3.16228	0.141421	3.3037	0.042807
ZNF81	3.16228	0.141421	3.3037	0.042807
ZNF839	3.16228	0.141421	3.3037	0.042807
DTNA	3.16228	0.141421	3.3037	0.042807
GPR157	3.16228	0.141421	3.3037	0.042807
HSD17B3	3.16228	0.141421	3.3037	0.042807
IER5	3.16228	0.141421	3.3037	0.042807
LOC101904879	3.16228	0.141421	3.3037	0.042807
UGT1A6	3.16228	0.145664	3.30794	0.0440346
LOC101905723	2.62937	0.141421	2.77079	0.0510401
LOC786942	2.62937	0.141421	2.77079	0.0510401
C10H15orf62	2.95195	0.160513	3.11246	0.0515712
BCDIN3D	2.41523	0.141421	2.55665	0.0553151
C11H9orf50	2.41523	0.141421	2.55665	0.0553151
CTRB1	2.41523	0.141421	2.55665	0.0553151
GCNT7	2.41523	0.141421	2.55665	0.0553151
GRP	2.41523	0.141421	2.55665	0.0553151
KCNJ16	2.41523	0.141421	2.55665	0.0553151
LOC100335675	2.41523	0.141421	2.55665	0.0553151
LOC101902531	2.41523	0.141421	2.55665	0.0553151
LOC101904013	2.41523	0.141421	2.55665	0.0553151
LOC104971315	2.41523	0.141421	2.55665	0.0553151
LOC104975241	2.41523	0.141421	2.55665	0.0553151
LOC107132680	2.41523	0.141421	2.55665	0.0553151
LOC112442314	2.41523	0.141421	2.55665	0.0553151
LOC112446476	2.41523	0.141421	2.55665	0.0553151
NDRG1	2.41523	0.141421	2.55665	0.0553151
SLC4A1	2.41523	0.141421	2.55665	0.0553151
TNFRSF19	2.41523	0.141421	2.55665	0.0553151
TSPAN2	2.41523	0.141421	2.55665	0.0553151
ZBTB4	2.41523	0.141421	2.55665	0.0553151
FAM92B	2.24983	0.141421	2.39125	0.0591412
CD68	2.18899	0.141421	2.33041	0.0606852
GAL	2.10819	0.141421	2.24961	0.0628649
LOC104971235	2.10819	0.141421	2.24961	0.0628649
LOC104971845	2.10819	0.141421	2.24961	0.0628649
ACKR3	3.16228	0.212132	3.37441	0.0628649
AQP9	3.16228	0.212132	3.37441	0.0628649
C26H6orf52	3.16228	0.212132	3.37441	0.0628649
CAPNS2	3.16228	0.212132	3.37441	0.0628649
CCR6	3.16228	0.212132	3.37441	0.0628649
CDNF	3.16228	0.212132	3.37441	0.0628649
CEP295NL	3.16228	0.212132	3.37441	0.0628649
CNTN1	3.16228	0.212132	3.37441	0.0628649
COL6A3	3.16228	0.212132	3.37441	0.0628649
CPB1	3.16228	0.212132	3.37441	0.0628649
CRX	3.16228	0.212132	3.37441	0.0628649
CSF2	3.16228	0.212132	3.37441	0.0628649
CXCL14	3.16228	0.212132	3.37441	0.0628649
DDO	3.16228	0.212132	3.37441	0.0628649
FAM71F1	3.16228	0.212132	3.37441	0.0628649
FOXJ1	3.16228	0.212132	3.37441	0.0628649
GPR15	3.16228	0.212132	3.37441	0.0628649
GRIN2C	3.16228	0.212132	3.37441	0.0628649
GRM6	3.16228	0.212132	3.37441	0.0628649
GSTT1	3.16228	0.212132	3.37441	0.0628649
HOXA10	3.16228	0.212132	3.37441	0.0628649
IL19	3.16228	0.212132	3.37441	0.0628649
IL22	3.16228	0.212132	3.37441	0.0628649
IL32	3.16228	0.212132	3.37441	0.0628649
IL6	3.16228	0.212132	3.37441	0.0628649
KCNQ2	3.16228	0.212132	3.37441	0.0628649
LCN2	3.16228	0.212132	3.37441	0.0628649
LOC100139881	3.16228	0.212132	3.37441	0.0628649
LOC100140788	3.16228	0.212132	3.37441	0.0628649
LOC100301224	3.16228	0.212132	3.37441	0.0628649
LOC101905770	3.16228	0.212132	3.37441	0.0628649
LOC101906498	3.16228	0.212132	3.37441	0.0628649
LOC101906737	3.16228	0.212132	3.37441	0.0628649
LOC104971023	3.16228	0.212132	3.37441	0.0628649
LOC104972216	3.16228	0.212132	3.37441	0.0628649
LOC104972285	3.16228	0.212132	3.37441	0.0628649
LOC104973767	3.16228	0.212132	3.37441	0.0628649
LOC104974474	3.16228	0.212132	3.37441	0.0628649
LOC104975366	3.16228	0.212132	3.37441	0.0628649
LOC107132222	3.16228	0.212132	3.37441	0.0628649
LOC107132841	3.16228	0.212132	3.37441	0.0628649
LOC112441573	3.16228	0.212132	3.37441	0.0628649
LOC112443143	3.16228	0.212132	3.37441	0.0628649
LOC112444844	3.16228	0.212132	3.37441	0.0628649
LOC112446049	3.16228	0.212132	3.37441	0.0628649
LOC112446710	3.16228	0.212132	3.37441	0.0628649
LOC112447113	3.16228	0.212132	3.37441	0.0628649
LOC112449031	3.16228	0.212132	3.37441	0.0628649
LOC112449262	3.16228	0.212132	3.37441	0.0628649
LOC112449372	3.16228	0.212132	3.37441	0.0628649
LOC112449521	3.16228	0.212132	3.37441	0.0628649
LOC508459	3.16228	0.212132	3.37441	0.0628649
LOC518080	3.16228	0.212132	3.37441	0.0628649
LOC527409	3.16228	0.212132	3.37441	0.0628649
LOC536097	3.16228	0.212132	3.37441	0.0628649
LOC536660	3.16228	0.212132	3.37441	0.0628649
LOC615514	3.16228	0.212132	3.37441	0.0628649
LOC782251	3.16228	0.212132	3.37441	0.0628649
LOC782682	3.16228	0.212132	3.37441	0.0628649
LOC785997	3.16228	0.212132	3.37441	0.0628649
LOC789334	3.16228	0.212132	3.37441	0.0628649
MAMLD1	3.16228	0.212132	3.37441	0.0628649
MC2R	3.16228	0.212132	3.37441	0.0628649
MS4A3	3.16228	0.212132	3.37441	0.0628649
MYRIP	3.16228	0.212132	3.37441	0.0628649
NEXMIF	3.16228	0.212132	3.37441	0.0628649
PDE4C	3.16228	0.212132	3.37441	0.0628649
PTPN22	3.16228	0.212132	3.37441	0.0628649
RD3L	3.16228	0.212132	3.37441	0.0628649
ROBO4	3.16228	0.212132	3.37441	0.0628649
RXFP3	3.16228	0.212132	3.37441	0.0628649
SERPINA11	3.16228	0.212132	3.37441	0.0628649
SST	3.16228	0.212132	3.37441	0.0628649
TRPC4	3.16228	0.212132	3.37441	0.0628649
TTYH3	3.16228	0.212132	3.37441	0.0628649
ZNF488	3.16228	0.212132	3.37441	0.0628649
KRT80	3.16228	0.212132	3.37441	0.0628649
LOC785899	3.16228	0.212132	3.37441	0.0628649
ARMT1	3.16228	0.212132	3.37441	0.0628649
ABHD13	2.10819	0.141421	2.24961	0.0628649
ABLIM2	2.10819	0.141421	2.24961	0.0628649
ACAN	2.10819	0.141421	2.24961	0.0628649
ADGRD1	2.10819	0.141421	2.24961	0.0628649
ADORA2A	2.10819	0.141421	2.24961	0.0628649
AGRP	2.10819	0.141421	2.24961	0.0628649
AHSG	2.10819	0.141421	2.24961	0.0628649
AMN	2.10819	0.141421	2.24961	0.0628649
ANKAR	2.10819	0.141421	2.24961	0.0628649
ANKDD1B	2.10819	0.141421	2.24961	0.0628649
ANKRD50	2.10819	0.141421	2.24961	0.0628649
ANO1	2.10819	0.141421	2.24961	0.0628649
APEG3	2.10819	0.141421	2.24961	0.0628649
APOA5	2.10819	0.141421	2.24961	0.0628649
APOBEC4	2.10819	0.141421	2.24961	0.0628649
AQP7	2.10819	0.141421	2.24961	0.0628649
AQP8	2.10819	0.141421	2.24961	0.0628649
ASB13	2.10819	0.141421	2.24961	0.0628649
ASPN	2.10819	0.141421	2.24961	0.0628649
ATAD3A	2.10819	0.141421	2.24961	0.0628649
BATF2	2.10819	0.141421	2.24961	0.0628649
BCL2A1	2.10819	0.141421	2.24961	0.0628649
BEAN1	2.10819	0.141421	2.24961	0.0628649
BLVRA	2.10819	0.141421	2.24961	0.0628649
BMP1	2.10819	0.141421	2.24961	0.0628649
BPI	2.10819	0.141421	2.24961	0.0628649
BRSK1	2.10819	0.141421	2.24961	0.0628649
C10H15orf59	2.10819	0.141421	2.24961	0.0628649
C11H2orf40	2.10819	0.141421	2.24961	0.0628649
C13H20orf202	2.10819	0.141421	2.24961	0.0628649
C16H1orf167	2.10819	0.141421	2.24961	0.0628649
C17H4orf51	2.10819	0.141421	2.24961	0.0628649
C19H17orf50	2.10819	0.141421	2.24961	0.0628649
C19H17orf98	2.10819	0.141421	2.24961	0.0628649
C25H16orf58	2.10819	0.141421	2.24961	0.0628649
C28H10orf99	2.10819	0.141421	2.24961	0.0628649
C3H1orf54	2.10819	0.141421	2.24961	0.0628649
C8H9orf131	2.10819	0.141421	2.24961	0.0628649
CABP7	2.10819	0.141421	2.24961	0.0628649
CABS1	2.10819	0.141421	2.24961	0.0628649
CALHM5	2.10819	0.141421	2.24961	0.0628649
CALML6	2.10819	0.141421	2.24961	0.0628649
CARD11	2.10819	0.141421	2.24961	0.0628649
CAVIN2	2.10819	0.141421	2.24961	0.0628649
CBY3	2.10819	0.141421	2.24961	0.0628649
CCDC69	2.10819	0.141421	2.24961	0.0628649
CCT8L2	2.10819	0.141421	2.24961	0.0628649
CD4	2.10819	0.141421	2.24961	0.0628649
CDC42EP5	2.10819	0.141421	2.24961	0.0628649
CDHR2	2.10819	0.141421	2.24961	0.0628649
CEBPD	2.10819	0.141421	2.24961	0.0628649
CERS1	2.10819	0.141421	2.24961	0.0628649
CETN1	2.10819	0.141421	2.24961	0.0628649
CFP	2.10819	0.141421	2.24961	0.0628649
CHRDL2	2.10819	0.141421	2.24961	0.0628649
CISH	2.10819	0.141421	2.24961	0.0628649
CITED4	2.10819	0.141421	2.24961	0.0628649
CKMT2	2.10819	0.141421	2.24961	0.0628649
CLDN3	2.10819	0.141421	2.24961	0.0628649
CLDN7	2.10819	0.141421	2.24961	0.0628649
CLIP2	2.10819	0.141421	2.24961	0.0628649
CMKLR1	2.10819	0.141421	2.24961	0.0628649
CNGB1	2.10819	0.141421	2.24961	0.0628649
CNIH2	2.10819	0.141421	2.24961	0.0628649
COL17A1	2.10819	0.141421	2.24961	0.0628649
CPLX4	2.10819	0.141421	2.24961	0.0628649
CPO	2.10819	0.141421	2.24961	0.0628649
CREB3L3	2.10819	0.141421	2.24961	0.0628649
CRISPLD1	2.10819	0.141421	2.24961	0.0628649
CXCL16	2.10819	0.141421	2.24961	0.0628649
CYP1A1	2.10819	0.141421	2.24961	0.0628649
CYP2B6	2.10819	0.141421	2.24961	0.0628649
DES	2.10819	0.141421	2.24961	0.0628649
DLL1	2.10819	0.141421	2.24961	0.0628649
DNASE2B	2.10819	0.141421	2.24961	0.0628649
DSB	2.10819	0.141421	2.24961	0.0628649
DSC2	2.10819	0.141421	2.24961	0.0628649
ECSCR	2.10819	0.141421	2.24961	0.0628649
EFCAB1	2.10819	0.141421	2.24961	0.0628649
EFCAB3	2.10819	0.141421	2.24961	0.0628649
EFNA4	2.10819	0.141421	2.24961	0.0628649
EGR2	2.10819	0.141421	2.24961	0.0628649
ENTPD1	2.10819	0.141421	2.24961	0.0628649
ESX1	2.10819	0.141421	2.24961	0.0628649
EXD3	2.10819	0.141421	2.24961	0.0628649
FAM173A	2.10819	0.141421	2.24961	0.0628649
FAM183A	2.10819	0.141421	2.24961	0.0628649
FAM214B	2.10819	0.141421	2.24961	0.0628649
FAM222A	2.10819	0.141421	2.24961	0.0628649
FAM71E2	2.10819	0.141421	2.24961	0.0628649
FBN3	2.10819	0.141421	2.24961	0.0628649
FBP1	2.10819	0.141421	2.24961	0.0628649
FBXO2	2.10819	0.141421	2.24961	0.0628649
FGF17	2.10819	0.141421	2.24961	0.0628649
FGF22	2.10819	0.141421	2.24961	0.0628649
FHL3	2.10819	0.141421	2.24961	0.0628649
FNDC9	2.10819	0.141421	2.24961	0.0628649
FOXB1	2.10819	0.141421	2.24961	0.0628649
FOXF2	2.10819	0.141421	2.24961	0.0628649
FOXH1	2.10819	0.141421	2.24961	0.0628649
FRMD1	2.10819	0.141421	2.24961	0.0628649
FSIP2	2.10819	0.141421	2.24961	0.0628649
FUT10	2.10819	0.141421	2.24961	0.0628649
FUT2	2.10819	0.141421	2.24961	0.0628649
GAL3ST1	2.10819	0.141421	2.24961	0.0628649
GALNT18	2.10819	0.141421	2.24961	0.0628649
GGT7	2.10819	0.141421	2.24961	0.0628649
GIPC1	2.10819	0.141421	2.24961	0.0628649
GLIS2	2.10819	0.141421	2.24961	0.0628649
GNAL	2.10819	0.141421	2.24961	0.0628649
GNGT2	2.10819	0.141421	2.24961	0.0628649
GOLT1A	2.10819	0.141421	2.24961	0.0628649
HIST1H3C	2.10819	0.141421	2.24961	0.0628649
HMCN2	2.10819	0.141421	2.24961	0.0628649
HOXB1	2.10819	0.141421	2.24961	0.0628649
HSD3B7	2.10819	0.141421	2.24961	0.0628649
HSPB9	2.10819	0.141421	2.24961	0.0628649
HTR3C	2.10819	0.141421	2.24961	0.0628649
HYI	2.10819	0.141421	2.24961	0.0628649
IFNL3	2.10819	0.141421	2.24961	0.0628649
IL17F	2.10819	0.141421	2.24961	0.0628649
IRX2	2.10819	0.141421	2.24961	0.0628649
ITGA7	2.10819	0.141421	2.24961	0.0628649
KANK3	2.10819	0.141421	2.24961	0.0628649
KCND3	2.10819	0.141421	2.24961	0.0628649
KCNJ14	2.10819	0.141421	2.24961	0.0628649
KCNJ2	2.10819	0.141421	2.24961	0.0628649
KCNK10	2.10819	0.141421	2.24961	0.0628649
KCNS2	2.10819	0.141421	2.24961	0.0628649
KCTD19	2.10819	0.141421	2.24961	0.0628649
KIF12	2.10819	0.141421	2.24961	0.0628649
KIF21B	2.10819	0.141421	2.24961	0.0628649
KISS1R	2.10819	0.141421	2.24961	0.0628649
KLHDC8B	2.10819	0.141421	2.24961	0.0628649
KLK6	2.10819	0.141421	2.24961	0.0628649
KREMEN2	2.10819	0.141421	2.24961	0.0628649
KRT36	2.10819	0.141421	2.24961	0.0628649
LALBA	2.10819	0.141421	2.24961	0.0628649
LAMB2	2.10819	0.141421	2.24961	0.0628649
LDB2	2.10819	0.141421	2.24961	0.0628649
LIPI	2.10819	0.141421	2.24961	0.0628649
LOC100125913	2.10819	0.141421	2.24961	0.0628649
LOC100139549	2.10819	0.141421	2.24961	0.0628649
LOC100297056	2.10819	0.141421	2.24961	0.0628649
LOC100297263	2.10819	0.141421	2.24961	0.0628649
LOC100297358	2.10819	0.141421	2.24961	0.0628649
LOC100336013	2.10819	0.141421	2.24961	0.0628649
LOC100336669	2.10819	0.141421	2.24961	0.0628649
LOC100847122	2.10819	0.141421	2.24961	0.0628649
LOC100847745	2.10819	0.141421	2.24961	0.0628649
LOC100847831	2.10819	0.141421	2.24961	0.0628649
LOC100848122	2.10819	0.141421	2.24961	0.0628649
LOC100848357	2.10819	0.141421	2.24961	0.0628649
LOC100848478	2.10819	0.141421	2.24961	0.0628649
LOC100848536	2.10819	0.141421	2.24961	0.0628649
LOC100848853	2.10819	0.141421	2.24961	0.0628649
LOC101901897	2.10819	0.141421	2.24961	0.0628649
LOC101901937	2.10819	0.141421	2.24961	0.0628649
LOC101902407	2.10819	0.141421	2.24961	0.0628649
LOC101903165	2.10819	0.141421	2.24961	0.0628649
LOC101903182	2.10819	0.141421	2.24961	0.0628649
LOC101903509	2.10819	0.141421	2.24961	0.0628649
LOC101903749	2.10819	0.141421	2.24961	0.0628649
LOC101903945	2.10819	0.141421	2.24961	0.0628649
LOC101904174	2.10819	0.141421	2.24961	0.0628649
LOC101904227	2.10819	0.141421	2.24961	0.0628649
LOC101904646	2.10819	0.141421	2.24961	0.0628649
LOC101904680	2.10819	0.141421	2.24961	0.0628649
LOC101905136	2.10819	0.141421	2.24961	0.0628649
LOC101905651	2.10819	0.141421	2.24961	0.0628649
LOC101905833	2.10819	0.141421	2.24961	0.0628649
LOC101905857	2.10819	0.141421	2.24961	0.0628649
LOC101906171	2.10819	0.141421	2.24961	0.0628649
LOC101906330	2.10819	0.141421	2.24961	0.0628649
LOC101906411	2.10819	0.141421	2.24961	0.0628649
LOC101906484	2.10819	0.141421	2.24961	0.0628649
LOC101906725	2.10819	0.141421	2.24961	0.0628649
LOC101906823	2.10819	0.141421	2.24961	0.0628649
LOC101906903	2.10819	0.141421	2.24961	0.0628649
LOC101906914	2.10819	0.141421	2.24961	0.0628649
LOC101907342	2.10819	0.141421	2.24961	0.0628649
LOC101907539	2.10819	0.141421	2.24961	0.0628649
LOC101907661	2.10819	0.141421	2.24961	0.0628649
LOC101907744	2.10819	0.141421	2.24961	0.0628649
LOC101907959	2.10819	0.141421	2.24961	0.0628649
LOC104968479	2.10819	0.141421	2.24961	0.0628649
LOC104968671	2.10819	0.141421	2.24961	0.0628649
LOC104969525	2.10819	0.141421	2.24961	0.0628649
LOC104969531	2.10819	0.141421	2.24961	0.0628649
LOC104969653	2.10819	0.141421	2.24961	0.0628649
LOC104970383	2.10819	0.141421	2.24961	0.0628649
LOC104970594	2.10819	0.141421	2.24961	0.0628649
LOC104971291	2.10819	0.141421	2.24961	0.0628649
LOC104971464	2.10819	0.141421	2.24961	0.0628649
LOC104971636	2.10819	0.141421	2.24961	0.0628649
LOC104972402	2.10819	0.141421	2.24961	0.0628649
LOC104972595	2.10819	0.141421	2.24961	0.0628649
LOC104972617	2.10819	0.141421	2.24961	0.0628649
LOC104972888	2.10819	0.141421	2.24961	0.0628649
LOC104973252	2.10819	0.141421	2.24961	0.0628649
LOC104974455	2.10819	0.141421	2.24961	0.0628649
LOC104974498	2.10819	0.141421	2.24961	0.0628649
LOC104974905	2.10819	0.141421	2.24961	0.0628649
LOC104975219	2.10819	0.141421	2.24961	0.0628649
LOC104975373	2.10819	0.141421	2.24961	0.0628649
LOC104975781	2.10819	0.141421	2.24961	0.0628649
LOC104976229	2.10819	0.141421	2.24961	0.0628649
LOC104976236	2.10819	0.141421	2.24961	0.0628649
LOC104976279	2.10819	0.141421	2.24961	0.0628649
LOC107131395	2.10819	0.141421	2.24961	0.0628649
LOC107131534	2.10819	0.141421	2.24961	0.0628649
LOC107131611	2.10819	0.141421	2.24961	0.0628649
LOC107131637	2.10819	0.141421	2.24961	0.0628649
LOC107131929	2.10819	0.141421	2.24961	0.0628649
LOC107131946	2.10819	0.141421	2.24961	0.0628649
LOC107132070	2.10819	0.141421	2.24961	0.0628649
LOC107132469	2.10819	0.141421	2.24961	0.0628649
LOC107132486	2.10819	0.141421	2.24961	0.0628649
LOC107132490	2.10819	0.141421	2.24961	0.0628649
LOC107132655	2.10819	0.141421	2.24961	0.0628649
LOC107132714	2.10819	0.141421	2.24961	0.0628649
LOC107132945	2.10819	0.141421	2.24961	0.0628649
LOC107132979	2.10819	0.141421	2.24961	0.0628649
LOC107132986	2.10819	0.141421	2.24961	0.0628649
LOC107133323	2.10819	0.141421	2.24961	0.0628649
LOC112441567	2.10819	0.141421	2.24961	0.0628649
LOC112441639	2.10819	0.141421	2.24961	0.0628649
LOC112441838	2.10819	0.141421	2.24961	0.0628649
LOC112441839	2.10819	0.141421	2.24961	0.0628649
LOC112441883	2.10819	0.141421	2.24961	0.0628649
LOC112442080	2.10819	0.141421	2.24961	0.0628649
LOC112442190	2.10819	0.141421	2.24961	0.0628649
LOC112442222	2.10819	0.141421	2.24961	0.0628649
LOC112442224	2.10819	0.141421	2.24961	0.0628649
LOC112442231	2.10819	0.141421	2.24961	0.0628649
LOC112442347	2.10819	0.141421	2.24961	0.0628649
LOC112442371	2.10819	0.141421	2.24961	0.0628649
LOC112442386	2.10819	0.141421	2.24961	0.0628649
LOC112442543	2.10819	0.141421	2.24961	0.0628649
LOC112442613	2.10819	0.141421	2.24961	0.0628649
LOC112442616	2.10819	0.141421	2.24961	0.0628649
LOC112442634	2.10819	0.141421	2.24961	0.0628649
LOC112442997	2.10819	0.141421	2.24961	0.0628649
LOC112443204	2.10819	0.141421	2.24961	0.0628649
LOC112443423	2.10819	0.141421	2.24961	0.0628649
LOC112443459	2.10819	0.141421	2.24961	0.0628649
LOC112443477	2.10819	0.141421	2.24961	0.0628649
LOC112443721	2.10819	0.141421	2.24961	0.0628649
LOC112443839	2.10819	0.141421	2.24961	0.0628649
LOC112444305	2.10819	0.141421	2.24961	0.0628649
LOC112444335	2.10819	0.141421	2.24961	0.0628649
LOC112444632	2.10819	0.141421	2.24961	0.0628649
LOC112445063	2.10819	0.141421	2.24961	0.0628649
LOC112445931	2.10819	0.141421	2.24961	0.0628649
LOC112445953	2.10819	0.141421	2.24961	0.0628649
LOC112445991	2.10819	0.141421	2.24961	0.0628649
LOC112446339	2.10819	0.141421	2.24961	0.0628649
LOC112446385	2.10819	0.141421	2.24961	0.0628649
LOC112446415	2.10819	0.141421	2.24961	0.0628649
LOC112446681	2.10819	0.141421	2.24961	0.0628649
LOC112446771	2.10819	0.141421	2.24961	0.0628649
LOC112446882	2.10819	0.141421	2.24961	0.0628649
LOC112447367	2.10819	0.141421	2.24961	0.0628649
LOC112447377	2.10819	0.141421	2.24961	0.0628649
LOC112447539	2.10819	0.141421	2.24961	0.0628649
LOC112447544	2.10819	0.141421	2.24961	0.0628649
LOC112447558	2.10819	0.141421	2.24961	0.0628649
LOC112447769	2.10819	0.141421	2.24961	0.0628649
LOC112447806	2.10819	0.141421	2.24961	0.0628649
LOC112448021	2.10819	0.141421	2.24961	0.0628649
LOC112448105	2.10819	0.141421	2.24961	0.0628649
LOC112448466	2.10819	0.141421	2.24961	0.0628649
LOC112448507	2.10819	0.141421	2.24961	0.0628649
LOC112448516	2.10819	0.141421	2.24961	0.0628649
LOC112448786	2.10819	0.141421	2.24961	0.0628649
LOC112448830	2.10819	0.141421	2.24961	0.0628649
LOC112449041	2.10819	0.141421	2.24961	0.0628649
LOC112449106	2.10819	0.141421	2.24961	0.0628649
LOC112449352	2.10819	0.141421	2.24961	0.0628649
LOC112449508	2.10819	0.141421	2.24961	0.0628649
LOC112449522	2.10819	0.141421	2.24961	0.0628649
LOC112449527	2.10819	0.141421	2.24961	0.0628649
[truncated: 15,770 more rows]

## Sheet: 4cell
label	SSwe	SSbe	SS	SSwe/SS
CDH17	0.0258114	2.23607	2.26188	0.0114115
MYH14	0.0571425	2.23607	2.29321	0.0249181
SLC8A3	0.0593815	2.23607	2.29545	0.0258692
LOC112443405	0.0799994	2.23607	2.31607	0.034541
THBS2	0.0942806	2.23607	2.33035	0.0404577
LOC112442570	0.100449	2.23607	2.33652	0.0429911
IL20RB	0.103279	2.23607	2.33935	0.0441487
KRT25	0.103279	2.23607	2.33935	0.0441487
IGSF21	0.108866	2.23607	2.34493	0.046426
LOC540128	0.0712932	1.38858	1.45988	0.0488351
LOC104972622	0.133332	2.23607	2.3694	0.0562723
LOC112441639	0.133332	2.23607	2.3694	0.0562723
LOC101901897	0.133332	2.23607	2.3694	0.0562723
LOC508820	0.133332	2.23607	2.3694	0.0562723
LOC112443808	0.133332	2.23607	2.3694	0.0562723
SLC22A20P	0.133332	2.23607	2.3694	0.0562723
LOC100848921	0.0851043	1.3924	1.4775	0.0576
ULBP21	0.141421	2.23607	2.37749	0.0594832
PGGHG	0.143806	2.23607	2.37987	0.0604257
C17H4orf46	0.153187	2.23607	2.38926	0.064115
LOC100336921	0.153187	2.23607	2.38926	0.064115
LOC510901	0.0951239	1.37361	1.46873	0.064766
BLOC1S3	0.163298	2.23607	2.39937	0.0680587
HOXC10	0.163298	2.23607	2.39937	0.0680587
PAX4	0.163298	2.23607	2.39937	0.0680587
DUS2	0.163298	2.23607	2.39937	0.0680587
LOC101905340	0.163298	2.23607	2.39937	0.0680587
LOC112443847	0.163298	2.23607	2.39937	0.0680587
LBP	0.163299	2.23607	2.39937	0.068059
NTN4	0.168583	2.23607	2.40465	0.070107
LOC100848006	0.177664	2.23607	2.41373	0.0736055
USP26	0.183249	2.23607	2.41932	0.075744
DMP1	0.201327	2.23607	2.4374	0.0825994
FZD7	0.201327	2.23607	2.4374	0.0825994
LOC505072	0.201327	2.23607	2.4374	0.0825994
LOC107131477	0.210818	2.23607	2.44689	0.0861576
LOC112442572	0.136082	1.41421	1.5503	0.0877782
LOC101906240	0.230935	2.23607	2.467	0.0936097
LOC112443478	0.230935	2.23607	2.467	0.0936097
LOC112444181	0.230935	2.23607	2.467	0.0936097
LOC100296624	0.230935	2.23607	2.467	0.0936097
LOC112444502	0.230935	2.23607	2.467	0.0936097
LOC112449361	0.230935	2.23607	2.467	0.0936097
LOC112448466	0.230935	2.23607	2.467	0.0936097
FGF8	0.230935	2.23607	2.467	0.0936097
LGALS12	0.230935	2.23607	2.467	0.0936097
LOC107132452	0.230935	2.23607	2.467	0.0936097
LOC112446764	0.230935	2.23607	2.467	0.0936097
ANGPTL2	0.230935	2.23607	2.467	0.0936097
LOC104971374	0.230935	2.23607	2.467	0.0936097
LOC104974303	0.230935	2.23607	2.467	0.0936097
LOC107131525	0.230935	2.23607	2.467	0.0936097
LOC790098	0.230935	2.23607	2.467	0.0936097
LRRC75A	0.230935	2.23607	2.467	0.0936097
ONECUT1	0.230935	2.23607	2.467	0.0936097
LIMK1	0.230935	2.23607	2.467	0.0936097
LOC101903896	0.230935	2.23607	2.467	0.0936097
LOC107131556	0.230935	2.23607	2.467	0.0936097
LOC112444324	0.230935	2.23607	2.467	0.0936097
LOC112448807	0.230935	2.23607	2.467	0.0936097
ARSH	0.230935	2.23607	2.467	0.0936097
LOC107131663	0.230935	2.23607	2.467	0.0936097
MFSD6L	0.230935	2.23607	2.467	0.0936097
ADPRHL2	0.230935	2.23607	2.467	0.0936097
AQP8	0.230935	2.23607	2.467	0.0936097
C1H21orf58	0.230935	2.23607	2.467	0.0936097
COL9A1	0.230935	2.23607	2.467	0.0936097
COX7B2	0.230935	2.23607	2.467	0.0936097
EDAR	0.230935	2.23607	2.467	0.0936097
FAM71E2	0.230935	2.23607	2.467	0.0936097
GAPDHS	0.230935	2.23607	2.467	0.0936097
GNMT	0.230935	2.23607	2.467	0.0936097
IFI27	0.230935	2.23607	2.467	0.0936097
IFNB1	0.230935	2.23607	2.467	0.0936097
KRT71	0.230935	2.23607	2.467	0.0936097
LMTK3	0.230935	2.23607	2.467	0.0936097
LOC100851323	0.230935	2.23607	2.467	0.0936097
LOC101902174	0.230935	2.23607	2.467	0.0936097
LOC101902712	0.230935	2.23607	2.467	0.0936097
LOC101904130	0.230935	2.23607	2.467	0.0936097
LOC104968446	0.230935	2.23607	2.467	0.0936097
LOC104973489	0.230935	2.23607	2.467	0.0936097
LOC104975489	0.230935	2.23607	2.467	0.0936097
LOC104976976	0.230935	2.23607	2.467	0.0936097
LOC107131335	0.230935	2.23607	2.467	0.0936097
LOC107131601	0.230935	2.23607	2.467	0.0936097
LOC107132781	0.230935	2.23607	2.467	0.0936097
LOC112442037	0.230935	2.23607	2.467	0.0936097
LOC112443445	0.230935	2.23607	2.467	0.0936097
LOC112443820	0.230935	2.23607	2.467	0.0936097
LOC112444307	0.230935	2.23607	2.467	0.0936097
LOC112446642	0.230935	2.23607	2.467	0.0936097
LOC112446715	0.230935	2.23607	2.467	0.0936097
LOC112447034	0.230935	2.23607	2.467	0.0936097
LOC112448035	0.230935	2.23607	2.467	0.0936097
LOC112448872	0.230935	2.23607	2.467	0.0936097
LOC534181	0.230935	2.23607	2.467	0.0936097
LOC782977	0.230935	2.23607	2.467	0.0936097
LSAMP	0.230935	2.23607	2.467	0.0936097
MTA2	0.230935	2.23607	2.467	0.0936097
PDE11A	0.230935	2.23607	2.467	0.0936097
PEPD	0.230935	2.23607	2.467	0.0936097
PM20D2	0.230935	2.23607	2.467	0.0936097
POU2AF1	0.230935	2.23607	2.467	0.0936097
POU2F2	0.230935	2.23607	2.467	0.0936097
RASA3	0.230935	2.23607	2.467	0.0936097
RING1	0.230935	2.23607	2.467	0.0936097
SCHIP1	0.230935	2.23607	2.467	0.0936097
STAC	0.230935	2.23607	2.467	0.0936097
TMEM204	0.230935	2.23607	2.467	0.0936097
TNFRSF4	0.230935	2.23607	2.467	0.0936097
TUBA8	0.230935	2.23607	2.467	0.0936097
ADAM8	0.230938	2.23607	2.46701	0.0936106
C1QA	0.230938	2.23607	2.46701	0.0936106
FEZF2	0.230938	2.23607	2.46701	0.0936106
LOC100139916	0.230938	2.23607	2.46701	0.0936106
LOC100335467	0.230938	2.23607	2.46701	0.0936106
LOC112443447	0.230938	2.23607	2.46701	0.0936106
LOC112445065	0.230938	2.23607	2.46701	0.0936106
OCIAD2	0.230938	2.23607	2.46701	0.0936106
PPP1R3B	0.230938	2.23607	2.46701	0.0936106
LOC101905802	0.230939	2.23607	2.46701	0.0936108
CD14	0.230939	2.23607	2.46701	0.0936111
ADNCR	0.230942	2.23607	2.46701	0.0936119
LOC112448747	0.239998	2.23607	2.47607	0.0969272
PRDM10	0.239998	2.23607	2.47607	0.0969272
LOX	0.239998	2.23607	2.47607	0.0969272
ADTRP	0.239998	2.23607	2.47607	0.0969272
LOC112446661	0.239998	2.23607	2.47607	0.0969272
TEP1	0.239998	2.23607	2.47607	0.0969272
CCL22	0.239999	2.23607	2.47607	0.0969275
LOC112445957	0.244948	2.23607	2.48102	0.0987288
TSPAN2	0.253411	2.23607	2.48948	0.101793
LOC112445157	0.25531	2.23607	2.49138	0.102478
THRB	0.25531	2.23607	2.49138	0.102478
ZNF8	0.25531	2.23607	2.49138	0.102478
ACTN3	0.25531	2.23607	2.49138	0.102478
KCNMB4	0.25531	2.23607	2.49138	0.102478
LOC101905743	0.25531	2.23607	2.49138	0.102478
CTSH	0.25531	2.23607	2.49138	0.102478
LOC101908577	0.25531	2.23607	2.49138	0.102478
LOC112442709	0.25531	2.23607	2.49138	0.102478
CASP8	0.25531	2.23607	2.49138	0.102478
LOC112445077	0.25531	2.23607	2.49138	0.102478
RUNX3	0.25531	2.23607	2.49138	0.102478
C5H12orf56	0.25531	2.23607	2.49138	0.102478
LOC107132944	0.25531	2.23607	2.49138	0.102478
LOC528629	0.25531	2.23607	2.49138	0.102478
PROSER2	0.25531	2.23607	2.49138	0.102478
SKIL	0.25531	2.23607	2.49138	0.102478
DMRTB1	0.25531	2.23607	2.49138	0.102478
GABRQ	0.25531	2.23607	2.49138	0.102478
GEM	0.25531	2.23607	2.49138	0.102478
GSTO2	0.25531	2.23607	2.49138	0.102478
HSD3B7	0.25531	2.23607	2.49138	0.102478
IL12RB1	0.25531	2.23607	2.49138	0.102478
KLHL34	0.25531	2.23607	2.49138	0.102478
KLHL4	0.25531	2.23607	2.49138	0.102478
LOC100141070	0.25531	2.23607	2.49138	0.102478
LOC100848447	0.25531	2.23607	2.49138	0.102478
LOC101905795	0.25531	2.23607	2.49138	0.102478
LOC104969496	0.25531	2.23607	2.49138	0.102478
LOC104971407	0.25531	2.23607	2.49138	0.102478
LOC107132490	0.25531	2.23607	2.49138	0.102478
LOC112441825	0.25531	2.23607	2.49138	0.102478
LOC112445039	0.25531	2.23607	2.49138	0.102478
LOC112446357	0.25531	2.23607	2.49138	0.102478
LOC112446690	0.25531	2.23607	2.49138	0.102478
LOC112446800	0.25531	2.23607	2.49138	0.102478
LOC112447313	0.25531	2.23607	2.49138	0.102478
LOC112448830	0.25531	2.23607	2.49138	0.102478
LOC112449356	0.25531	2.23607	2.49138	0.102478
LOC777692	0.25531	2.23607	2.49138	0.102478
MSMB	0.25531	2.23607	2.49138	0.102478
NDRG1	0.25531	2.23607	2.49138	0.102478
NYAP1	0.25531	2.23607	2.49138	0.102478
SLC5A2	0.25531	2.23607	2.49138	0.102478
SMTNL1	0.25531	2.23607	2.49138	0.102478
TMEM88	0.25531	2.23607	2.49138	0.102478
TSSK1B	0.25531	2.23607	2.49138	0.102478
WDR6	0.25531	2.23607	2.49138	0.102478
PPP1R3A	0.255312	2.23607	2.49138	0.102478
PIWIL4	0.255312	2.23607	2.49138	0.102478
ZNF10	0.262892	2.23607	2.49896	0.1052
LOC112442993	0.270045	2.23607	2.50611	0.107755
LOC112449306	0.2708	2.23607	2.50687	0.108023
GLI1	0.28284	2.23607	2.51891	0.112287
HCN1	0.28284	2.23607	2.51891	0.112287
LOC508879	0.28284	2.23607	2.51891	0.112287
LOC528040	0.28284	2.23607	2.51891	0.112287
MS4A2	0.28284	2.23607	2.51891	0.112287
LOC112449052	0.28284	2.23607	2.51891	0.112287
ZSWIM2	0.28284	2.23607	2.51891	0.112287
KCNK17	0.28284	2.23607	2.51891	0.112287
CCDC188	0.28284	2.23607	2.51891	0.112287
DUSP4	0.28284	2.23607	2.51891	0.112287
FJX1	0.28284	2.23607	2.51891	0.112287
GNRH2	0.28284	2.23607	2.51891	0.112287
LOC100125913	0.28284	2.23607	2.51891	0.112287
LOC100139585	0.28284	2.23607	2.51891	0.112287
LOC100140207	0.28284	2.23607	2.51891	0.112287
LOC100298890	0.28284	2.23607	2.51891	0.112287
LOC104969641	0.28284	2.23607	2.51891	0.112287
LOC112445107	0.28284	2.23607	2.51891	0.112287
LOC112449031	0.28284	2.23607	2.51891	0.112287
LRP1B	0.28284	2.23607	2.51891	0.112287
MMD2	0.28284	2.23607	2.51891	0.112287
MYBPC1	0.28284	2.23607	2.51891	0.112287
NGF	0.28284	2.23607	2.51891	0.112287
OTC	0.28284	2.23607	2.51891	0.112287
PARVB	0.28284	2.23607	2.51891	0.112287
PTPRC	0.28284	2.23607	2.51891	0.112287
LOC107133139	0.282841	2.23607	2.51891	0.112287
THEG	0.185776	1.39526	1.58103	0.117503
BRSK2	0.302873	2.23607	2.53894	0.119291
LOC104971814	0.302873	2.23607	2.53894	0.119291
LOC506989	0.302873	2.23607	2.53894	0.119291
PRRG3	0.302873	2.23607	2.53894	0.119291
FAM196B	0.317395	2.23607	2.55346	0.1243
FOLH1B	0.317395	2.23607	2.55346	0.1243
LOC101904646	0.317395	2.23607	2.55346	0.1243
IL20RA	0.328259	2.23607	2.56433	0.12801
DGKK	0.328259	2.23607	2.56433	0.12801
SLITRK2	0.336648	2.23607	2.57272	0.130853
LOC787234	0.228786	1.41421	1.643	0.139249
LOC615808	0.32242	1.80662	2.12904	0.151439
LOC530556	0.340355	1.90599	2.24635	0.151515
C10H15orf62	0.399981	2.23607	2.63605	0.151735
ABCD1	0.399984	2.23607	2.63605	0.151736
ANKRD65	0.399984	2.23607	2.63605	0.151736
APOBEC4	0.399984	2.23607	2.63605	0.151736
BEST1	0.399984	2.23607	2.63605	0.151736
CALCA	0.399984	2.23607	2.63605	0.151736
CD1B5	0.399984	2.23607	2.63605	0.151736
CRABP1	0.399984	2.23607	2.63605	0.151736
CXCR3	0.399984	2.23607	2.63605	0.151736
DMC1	0.399984	2.23607	2.63605	0.151736
DMRTA2	0.399984	2.23607	2.63605	0.151736
DNAJB3	0.399984	2.23607	2.63605	0.151736
DPP7	0.399984	2.23607	2.63605	0.151736
DUSP21	0.399984	2.23607	2.63605	0.151736
EGFLAM	0.399984	2.23607	2.63605	0.151736
ENTPD1	0.399984	2.23607	2.63605	0.151736
FAM78A	0.399984	2.23607	2.63605	0.151736
FTCD	0.399984	2.23607	2.63605	0.151736
GALNT16	0.399984	2.23607	2.63605	0.151736
GHSR	0.399984	2.23607	2.63605	0.151736
GNAL	0.399984	2.23607	2.63605	0.151736
GPR87	0.399984	2.23607	2.63605	0.151736
HMX2	0.399984	2.23607	2.63605	0.151736
IL24	0.399984	2.23607	2.63605	0.151736
IQCE	0.399984	2.23607	2.63605	0.151736
KLF9	0.399984	2.23607	2.63605	0.151736
LOC100847122	0.399984	2.23607	2.63605	0.151736
LOC100848463	0.399984	2.23607	2.63605	0.151736
LOC101903773	0.399984	2.23607	2.63605	0.151736
LOC101904513	0.399984	2.23607	2.63605	0.151736
LOC101906222	0.399984	2.23607	2.63605	0.151736
LOC101906676	0.399984	2.23607	2.63605	0.151736
LOC101907539	0.399984	2.23607	2.63605	0.151736
LOC101907940	0.399984	2.23607	2.63605	0.151736
LOC104968479	0.399984	2.23607	2.63605	0.151736
LOC104969050	0.399984	2.23607	2.63605	0.151736
LOC104969640	0.399984	2.23607	2.63605	0.151736
LOC104970598	0.399984	2.23607	2.63605	0.151736
LOC104971585	0.399984	2.23607	2.63605	0.151736
LOC104975507	0.399984	2.23607	2.63605	0.151736
LOC107131968	0.399984	2.23607	2.63605	0.151736
LOC107132968	0.399984	2.23607	2.63605	0.151736
LOC107133268	0.399984	2.23607	2.63605	0.151736
LOC112441855	0.399984	2.23607	2.63605	0.151736
LOC112442251	0.399984	2.23607	2.63605	0.151736
LOC112442315	0.399984	2.23607	2.63605	0.151736
LOC112442401	0.399984	2.23607	2.63605	0.151736
LOC112442402	0.399984	2.23607	2.63605	0.151736
LOC112443824	0.399984	2.23607	2.63605	0.151736
LOC112444279	0.399984	2.23607	2.63605	0.151736
LOC112444281	0.399984	2.23607	2.63605	0.151736
LOC112444871	0.399984	2.23607	2.63605	0.151736
LOC112445877	0.399984	2.23607	2.63605	0.151736
LOC112447033	0.399984	2.23607	2.63605	0.151736
LOC112447110	0.399984	2.23607	2.63605	0.151736
LOC112447441	0.399984	2.23607	2.63605	0.151736
LOC112447506	0.399984	2.23607	2.63605	0.151736
LOC112447744	0.399984	2.23607	2.63605	0.151736
LOC112447841	0.399984	2.23607	2.63605	0.151736
LOC112447887	0.399984	2.23607	2.63605	0.151736
LOC112448392	0.399984	2.23607	2.63605	0.151736
LOC112448881	0.399984	2.23607	2.63605	0.151736
LOC112449105	0.399984	2.23607	2.63605	0.151736
LOC112449341	0.399984	2.23607	2.63605	0.151736
LOC112449599	0.399984	2.23607	2.63605	0.151736
LOC539818	0.399984	2.23607	2.63605	0.151736
LOC615014	0.399984	2.23607	2.63605	0.151736
LOC616911	0.399984	2.23607	2.63605	0.151736
LOC618075	0.399984	2.23607	2.63605	0.151736
LOC783649	0.399984	2.23607	2.63605	0.151736
LOC786256	0.399984	2.23607	2.63605	0.151736
LRP3	0.399984	2.23607	2.63605	0.151736
LYZL6	0.399984	2.23607	2.63605	0.151736
NAPRT	0.399984	2.23607	2.63605	0.151736
NRBP2	0.399984	2.23607	2.63605	0.151736
OASL	0.399984	2.23607	2.63605	0.151736
OR5A1	0.399984	2.23607	2.63605	0.151736
PHGR1	0.399984	2.23607	2.63605	0.151736
PIK3IP1	0.399984	2.23607	2.63605	0.151736
RCSD1	0.399984	2.23607	2.63605	0.151736
SH3BP2	0.399984	2.23607	2.63605	0.151736
SH3RF3	0.399984	2.23607	2.63605	0.151736
SMIM33	0.399984	2.23607	2.63605	0.151736
TEKT4	0.399984	2.23607	2.63605	0.151736
TEX49	0.399984	2.23607	2.63605	0.151736
THEMIS2	0.399984	2.23607	2.63605	0.151736
TJP3	0.399984	2.23607	2.63605	0.151736
TMEM173	0.399984	2.23607	2.63605	0.151736
TMEM52B	0.399984	2.23607	2.63605	0.151736
TREX2	0.399984	2.23607	2.63605	0.151736
USH1G	0.399984	2.23607	2.63605	0.151736
XKR6	0.399984	2.23607	2.63605	0.151736
ZIC3	0.399984	2.23607	2.63605	0.151736
ZNF74	0.399984	2.23607	2.63605	0.151736
ACPP	0.399984	2.23607	2.63605	0.151736
ACTC1	0.399984	2.23607	2.63605	0.151736
AGPAT2	0.399984	2.23607	2.63605	0.151736
AMY2B	0.399984	2.23607	2.63605	0.151736
APEG3	0.399984	2.23607	2.63605	0.151736
ARHGAP15	0.399984	2.23607	2.63605	0.151736
ART1	0.399984	2.23607	2.63605	0.151736
BCAS1	0.399984	2.23607	2.63605	0.151736
BSND	0.399984	2.23607	2.63605	0.151736
C11H2orf71	0.399984	2.23607	2.63605	0.151736
C1QTNF3	0.399984	2.23607	2.63605	0.151736
C25H16orf45	0.399984	2.23607	2.63605	0.151736
C3H1orf141	0.399984	2.23607	2.63605	0.151736
CA14	0.399984	2.23607	2.63605	0.151736
CCDC129	0.399984	2.23607	2.63605	0.151736
CCDC194	0.399984	2.23607	2.63605	0.151736
CCDC54	0.399984	2.23607	2.63605	0.151736
CILP2	0.399984	2.23607	2.63605	0.151736
CRIP1	0.399984	2.23607	2.63605	0.151736
CTRB1	0.399984	2.23607	2.63605	0.151736
CYP11A1	0.399984	2.23607	2.63605	0.151736
DALRD3	0.399984	2.23607	2.63605	0.151736
DLX2	0.399984	2.23607	2.63605	0.151736
FOXF1	0.399984	2.23607	2.63605	0.151736
FST	0.399984	2.23607	2.63605	0.151736
GDF6	0.399984	2.23607	2.63605	0.151736
HCN4	0.399984	2.23607	2.63605	0.151736
IER5L	0.399984	2.23607	2.63605	0.151736
KCNAB3	0.399984	2.23607	2.63605	0.151736
KCNK12	0.399984	2.23607	2.63605	0.151736
KLF13	0.399984	2.23607	2.63605	0.151736
LDHAL6B	0.399984	2.23607	2.63605	0.151736
LOC100138998	0.399984	2.23607	2.63605	0.151736
LOC100297056	0.399984	2.23607	2.63605	0.151736
LOC100298868	0.399984	2.23607	2.63605	0.151736
LOC100335514	0.399984	2.23607	2.63605	0.151736
LOC100335751	0.399984	2.23607	2.63605	0.151736
LOC100336013	0.399984	2.23607	2.63605	0.151736
LOC100848439	0.399984	2.23607	2.63605	0.151736
LOC100848959	0.399984	2.23607	2.63605	0.151736
LOC101901937	0.399984	2.23607	2.63605	0.151736
LOC101902084	0.399984	2.23607	2.63605	0.151736
LOC101903757	0.399984	2.23607	2.63605	0.151736
LOC101904084	0.399984	2.23607	2.63605	0.151736
LOC101904579	0.399984	2.23607	2.63605	0.151736
LOC101904622	0.399984	2.23607	2.63605	0.151736
LOC101905833	0.399984	2.23607	2.63605	0.151736
LOC101905912	0.399984	2.23607	2.63605	0.151736
LOC101905992	0.399984	2.23607	2.63605	0.151736
LOC101906042	0.399984	2.23607	2.63605	0.151736
LOC101907944	0.399984	2.23607	2.63605	0.151736
LOC104968502	0.399984	2.23607	2.63605	0.151736
LOC104969408	0.399984	2.23607	2.63605	0.151736
LOC104970821	0.399984	2.23607	2.63605	0.151736
LOC104972797	0.399984	2.23607	2.63605	0.151736
LOC104973073	0.399984	2.23607	2.63605	0.151736
LOC104974850	0.399984	2.23607	2.63605	0.151736
LOC104975192	0.399984	2.23607	2.63605	0.151736
LOC104975965	0.399984	2.23607	2.63605	0.151736
LOC107132170	0.399984	2.23607	2.63605	0.151736
LOC107132431	0.399984	2.23607	2.63605	0.151736
LOC107132821	0.399984	2.23607	2.63605	0.151736
LOC107132991	0.399984	2.23607	2.63605	0.151736
LOC107133242	0.399984	2.23607	2.63605	0.151736
LOC112441798	0.399984	2.23607	2.63605	0.151736
LOC112442209	0.399984	2.23607	2.63605	0.151736
LOC112442668	0.399984	2.23607	2.63605	0.151736
LOC112442679	0.399984	2.23607	2.63605	0.151736
LOC112442740	0.399984	2.23607	2.63605	0.151736
LOC112442980	0.399984	2.23607	2.63605	0.151736
LOC112443495	0.399984	2.23607	2.63605	0.151736
LOC112443849	0.399984	2.23607	2.63605	0.151736
LOC112444461	0.399984	2.23607	2.63605	0.151736
LOC112444482	0.399984	2.23607	2.63605	0.151736
LOC112445993	0.399984	2.23607	2.63605	0.151736
LOC112446025	0.399984	2.23607	2.63605	0.151736
LOC112446033	0.399984	2.23607	2.63605	0.151736
LOC112446676	0.399984	2.23607	2.63605	0.151736
LOC112447074	0.399984	2.23607	2.63605	0.151736
LOC112447444	0.399984	2.23607	2.63605	0.151736
LOC112447726	0.399984	2.23607	2.63605	0.151736
LOC112447769	0.399984	2.23607	2.63605	0.151736
LOC112448006	0.399984	2.23607	2.63605	0.151736
LOC112448050	0.399984	2.23607	2.63605	0.151736
LOC112448094	0.399984	2.23607	2.63605	0.151736
LOC112448454	0.399984	2.23607	2.63605	0.151736
LOC112448540	0.399984	2.23607	2.63605	0.151736
LOC112448832	0.399984	2.23607	2.63605	0.151736
LOC112449316	0.399984	2.23607	2.63605	0.151736
LOC112449547	0.399984	2.23607	2.63605	0.151736
LOC513384	0.399984	2.23607	2.63605	0.151736
LOC516494	0.399984	2.23607	2.63605	0.151736
LOC528282	0.399984	2.23607	2.63605	0.151736
LOC529969	0.399984	2.23607	2.63605	0.151736
LOC530668	0.399984	2.23607	2.63605	0.151736
LOC534578	0.399984	2.23607	2.63605	0.151736
LOC613515	0.399984	2.23607	2.63605	0.151736
LOC616942	0.399984	2.23607	2.63605	0.151736
LOC617592	0.399984	2.23607	2.63605	0.151736
LOC618801	0.399984	2.23607	2.63605	0.151736
LOC781261	0.399984	2.23607	2.63605	0.151736
LOC781663	0.399984	2.23607	2.63605	0.151736
LOC783616	0.399984	2.23607	2.63605	0.151736
LOC784052	0.399984	2.23607	2.63605	0.151736
LOR	0.399984	2.23607	2.63605	0.151736
LRFN4	0.399984	2.23607	2.63605	0.151736
2024-03-04	0.399984	2.23607	2.63605	0.151736
MLYCD	0.399984	2.23607	2.63605	0.151736
MRGPRF	0.399984	2.23607	2.63605	0.151736
MT1A	0.399984	2.23607	2.63605	0.151736
NHLRC1	0.399984	2.23607	2.63605	0.151736
OR2A2	0.399984	2.23607	2.63605	0.151736
PEAR1	0.399984	2.23607	2.63605	0.151736
PHKG1	0.399984	2.23607	2.63605	0.151736
PRKAR1B	0.399984	2.23607	2.63605	0.151736
PROK1	0.399984	2.23607	2.63605	0.151736
RDH5	0.399984	2.23607	2.63605	0.151736
SERPINB2	0.399984	2.23607	2.63605	0.151736
SH3BGR	0.399984	2.23607	2.63605	0.151736
SH3TC1	0.399984	2.23607	2.63605	0.151736
SLC13A2	0.399984	2.23607	2.63605	0.151736
SLC22A4	0.399984	2.23607	2.63605	0.151736
SLC34A3	0.399984	2.23607	2.63605	0.151736
SP140L	0.399984	2.23607	2.63605	0.151736
SPTA1	0.399984	2.23607	2.63605	0.151736
SSLP1	0.399984	2.23607	2.63605	0.151736
TEX28	0.399984	2.23607	2.63605	0.151736
TMCO2	0.399984	2.23607	2.63605	0.151736
TNNC1	0.399984	2.23607	2.63605	0.151736
TTYH2	0.399984	2.23607	2.63605	0.151736
UBAP1L	0.399984	2.23607	2.63605	0.151736
WNT11	0.399984	2.23607	2.63605	0.151736
WNT8B	0.399984	2.23607	2.63605	0.151736
ZCCHC13	0.399984	2.23607	2.63605	0.151736
ZKSCAN4	0.399984	2.23607	2.63605	0.151736
ZNF787	0.399984	2.23607	2.63605	0.151736
ZSCAN5B	0.399984	2.23607	2.63605	0.151736
ANKMY1	0.399984	2.23607	2.63605	0.151736
ANKRD61	0.399984	2.23607	2.63605	0.151736
APCDD1	0.399984	2.23607	2.63605	0.151736
ASCL2	0.399984	2.23607	2.63605	0.151736
ATP2B3	0.399984	2.23607	2.63605	0.151736
C22H3orf18	0.399984	2.23607	2.63605	0.151736
C25H16orf82	0.399984	2.23607	2.63605	0.151736
C3	0.399984	2.23607	2.63605	0.151736
CALHM6	0.399984	2.23607	2.63605	0.151736
CCDC182	0.399984	2.23607	2.63605	0.151736
CDR2L	0.399984	2.23607	2.63605	0.151736
CERS1	0.399984	2.23607	2.63605	0.151736
COL8A2	0.399984	2.23607	2.63605	0.151736
DPYS	0.399984	2.23607	2.63605	0.151736
FGFRL1	0.399984	2.23607	2.63605	0.151736
FZD2	0.399984	2.23607	2.63605	0.151736
GALNT17	0.399984	2.23607	2.63605	0.151736
GPR171	0.399984	2.23607	2.63605	0.151736
GRIN2C	0.399984	2.23607	2.63605	0.151736
HAO2	0.399984	2.23607	2.63605	0.151736
HES3	0.399984	2.23607	2.63605	0.151736
HIST1H2BD	0.399984	2.23607	2.63605	0.151736
IL17B	0.399984	2.23607	2.63605	0.151736
IL25	0.399984	2.23607	2.63605	0.151736
IL9	0.399984	2.23607	2.63605	0.151736
IQCF6	0.399984	2.23607	2.63605	0.151736
IRX2	0.399984	2.23607	2.63605	0.151736
ISLR	0.399984	2.23607	2.63605	0.151736
ITPKB	0.399984	2.23607	2.63605	0.151736
KRT76	0.399984	2.23607	2.63605	0.151736
LAG3	0.399984	2.23607	2.63605	0.151736
LAIR1	0.399984	2.23607	2.63605	0.151736
LIPG	0.399984	2.23607	2.63605	0.151736
LOC101902937	0.399984	2.23607	2.63605	0.151736
LOC101904680	0.399984	2.23607	2.63605	0.151736
LOC101904784	0.399984	2.23607	2.63605	0.151736
LOC101905136	0.399984	2.23607	2.63605	0.151736
LOC104971985	0.399984	2.23607	2.63605	0.151736
LOC104974223	0.399984	2.23607	2.63605	0.151736
LOC104976004	0.399984	2.23607	2.63605	0.151736
LOC107131368	0.399984	2.23607	2.63605	0.151736
LOC107131570	0.399984	2.23607	2.63605	0.151736
LOC107132799	0.399984	2.23607	2.63605	0.151736
LOC107133075	0.399984	2.23607	2.63605	0.151736
LOC107133190	0.399984	2.23607	2.63605	0.151736
LOC112441540	0.399984	2.23607	2.63605	0.151736
LOC112441618	0.399984	2.23607	2.63605	0.151736
LOC112441769	0.399984	2.23607	2.63605	0.151736
LOC112442021	0.399984	2.23607	2.63605	0.151736
LOC112442392	0.399984	2.23607	2.63605	0.151736
LOC112443231	0.399984	2.23607	2.63605	0.151736
LOC112445119	0.399984	2.23607	2.63605	0.151736
LOC112446696	0.399984	2.23607	2.63605	0.151736
LOC112447469	0.399984	2.23607	2.63605	0.151736
LOC112447494	0.399984	2.23607	2.63605	0.151736
LOC112447776	0.399984	2.23607	2.63605	0.151736
LOC112448510	0.399984	2.23607	2.63605	0.151736
LOC112448525	0.399984	2.23607	2.63605	0.151736
LOC112448546	0.399984	2.23607	2.63605	0.151736
LOC112448894	0.399984	2.23607	2.63605	0.151736
LOC112449037	0.399984	2.23607	2.63605	0.151736
LOC112449087	0.399984	2.23607	2.63605	0.151736
LOC112449338	0.399984	2.23607	2.63605	0.151736
LOC112449514	0.399984	2.23607	2.63605	0.151736
LOC508834	0.399984	2.23607	2.63605	0.151736
LOC532100	0.399984	2.23607	2.63605	0.151736
LOC614416	0.399984	2.23607	2.63605	0.151736
LOC784458	0.399984	2.23607	2.63605	0.151736
LOXL2	0.399984	2.23607	2.63605	0.151736
LY6L	0.399984	2.23607	2.63605	0.151736
MGC137098	0.399984	2.23607	2.63605	0.151736
MGLL	0.399984	2.23607	2.63605	0.151736
MMEL1	0.399984	2.23607	2.63605	0.151736
MNX1	0.399984	2.23607	2.63605	0.151736
MUC5AC	0.399984	2.23607	2.63605	0.151736
MYO1G	0.399984	2.23607	2.63605	0.151736
MYOZ2	0.399984	2.23607	2.63605	0.151736
NELL2	0.399984	2.23607	2.63605	0.151736
OLFM3	0.399984	2.23607	2.63605	0.151736
OPN1SW	0.399984	2.23607	2.63605	0.151736
PNCK	0.399984	2.23607	2.63605	0.151736
POSTN	0.399984	2.23607	2.63605	0.151736
PRDM16	0.399984	2.23607	2.63605	0.151736
RHPN1	0.399984	2.23607	2.63605	0.151736
RINL	0.399984	2.23607	2.63605	0.151736
RMRP	0.399984	2.23607	2.63605	0.151736
S1PR1	0.399984	2.23607	2.63605	0.151736
SDCBP2	0.399984	2.23607	2.63605	0.151736
SIGLEC15	0.399984	2.23607	2.63605	0.151736
SIX6	0.399984	2.23607	2.63605	0.151736
SLC22A1	0.399984	2.23607	2.63605	0.151736
SLC6A9	0.399984	2.23607	2.63605	0.151736
TAAR3	0.399984	2.23607	2.63605	0.151736
TEX22	0.399984	2.23607	2.63605	0.151736
TGFB1	0.399984	2.23607	2.63605	0.151736
TNNT1	0.399984	2.23607	2.63605	0.151736
ZBTB47	0.399984	2.23607	2.63605	0.151736
ADSSL1	0.399984	2.23607	2.63605	0.151736
AICDA	0.399984	2.23607	2.63605	0.151736
ALPK2	0.399984	2.23607	2.63605	0.151736
AQP7	0.399984	2.23607	2.63605	0.151736
ARHGDIB	0.399984	2.23607	2.63605	0.151736
ARMH2	0.399984	2.23607	2.63605	0.151736
B4GALNT4	0.399984	2.23607	2.63605	0.151736
BATF2	0.399984	2.23607	2.63605	0.151736
BHMT2	0.399984	2.23607	2.63605	0.151736
BOLA-DMB	0.399984	2.23607	2.63605	0.151736
CHRNB4	0.399984	2.23607	2.63605	0.151736
CNIH2	0.399984	2.23607	2.63605	0.151736
DNAJB8	0.399984	2.23607	2.63605	0.151736
DPPA2	0.399984	2.23607	2.63605	0.151736
DPYSL4	0.399984	2.23607	2.63605	0.151736
DUSP27	0.399984	2.23607	2.63605	0.151736
EPPK1	0.399984	2.23607	2.63605	0.151736
F11	0.399984	2.23607	2.63605	0.151736
FAM183A	0.399984	2.23607	2.63605	0.151736
FAM198A	0.399984	2.23607	2.63605	0.151736
FAM214B	0.399984	2.23607	2.63605	0.151736
FAM216B	0.399984	2.23607	2.63605	0.151736
FMO2	0.399984	2.23607	2.63605	0.151736
GJC3	0.399984	2.23607	2.63605	0.151736
GNG7	0.399984	2.23607	2.63605	0.151736
GVQW3	0.399984	2.23607	2.63605	0.151736
GZMA	0.399984	2.23607	2.63605	0.151736
H1FX	0.399984	2.23607	2.63605	0.151736
HIST1H3C	0.399984	2.23607	2.63605	0.151736
KCNB1	0.399984	2.23607	2.63605	0.151736
KCNQ5	0.399984	2.23607	2.63605	0.151736
KLHL10	0.399984	2.23607	2.63605	0.151736
KLK7	0.399984	2.23607	2.63605	0.151736
KRT75	0.399984	2.23607	2.63605	0.151736
LOC100847861	0.399984	2.23607	2.63605	0.151736
LOC100848715	0.399984	2.23607	2.63605	0.151736
LOC101902920	0.399984	2.23607	2.63605	0.151736
LOC101904378	0.399984	2.23607	2.63605	0.151736
LOC101904757	0.399984	2.23607	2.63605	0.151736
LOC101905351	0.399984	2.23607	2.63605	0.151736
LOC101905453	0.399984	2.23607	2.63605	0.151736
LOC101906110	0.399984	2.23607	2.63605	0.151736
LOC101906447	0.399984	2.23607	2.63605	0.151736
LOC101907137	0.399984	2.23607	2.63605	0.151736
LOC101907250	0.399984	2.23607	2.63605	0.151736
LOC104970594	0.399984	2.23607	2.63605	0.151736
LOC104970940	0.399984	2.23607	2.63605	0.151736
LOC104971497	0.399984	2.23607	2.63605	0.151736
LOC104971845	0.399984	2.23607	2.63605	0.151736
LOC104973683	0.399984	2.23607	2.63605	0.151736
LOC104974455	0.399984	2.23607	2.63605	0.151736
LOC104974812	0.399984	2.23607	2.63605	0.151736
LOC107131782	0.399984	2.23607	2.63605	0.151736
LOC107131919	0.399984	2.23607	2.63605	0.151736
LOC107132680	0.399984	2.23607	2.63605	0.151736
LOC107132963	0.399984	2.23607	2.63605	0.151736
LOC107132986	0.399984	2.23607	2.63605	0.151736
LOC107133219	0.399984	2.23607	2.63605	0.151736
LOC112441774	0.399984	2.23607	2.63605	0.151736
LOC112441830	0.399984	2.23607	2.63605	0.151736
LOC112442667	0.399984	2.23607	2.63605	0.151736
LOC112443422	0.399984	2.23607	2.63605	0.151736
LOC112444151	0.399984	2.23607	2.63605	0.151736
LOC112444923	0.399984	2.23607	2.63605	0.151736
LOC112446015	0.399984	2.23607	2.63605	0.151736
LOC112447058	0.399984	2.23607	2.63605	0.151736
LOC112447322	0.399984	2.23607	2.63605	0.151736
LOC112447379	0.399984	2.23607	2.63605	0.151736
LOC112448537	0.399984	2.23607	2.63605	0.151736
LOC112449080	0.399984	2.23607	2.63605	0.151736
LOC112449605	0.399984	2.23607	2.63605	0.151736
LOC513508	0.399984	2.23607	2.63605	0.151736
LOC615901	0.399984	2.23607	2.63605	0.151736
LOC783533	0.399984	2.23607	2.63605	0.151736
LOXL3	0.399984	2.23607	2.63605	0.151736
MEF2B	0.399984	2.23607	2.63605	0.151736
MMP16	0.399984	2.23607	2.63605	0.151736
MYH4	0.399984	2.23607	2.63605	0.151736
NCF4	0.399984	2.23607	2.63605	0.151736
NHLH1	0.399984	2.23607	2.63605	0.151736
NTF4	0.399984	2.23607	2.63605	0.151736
OLFML2B	0.399984	2.23607	2.63605	0.151736
OR2A14	0.399984	2.23607	2.63605	0.151736
PCSK1N	0.399984	2.23607	2.63605	0.151736
PFN3	0.399984	2.23607	2.63605	0.151736
PI16	0.399984	2.23607	2.63605	0.151736
PLA2G5	0.399984	2.23607	2.63605	0.151736
RAD51AP2	0.399984	2.23607	2.63605	0.151736
RASL10A	0.399984	2.23607	2.63605	0.151736
SNTN	0.399984	2.23607	2.63605	0.151736
SNX33	0.399984	2.23607	2.63605	0.151736
SPARCL1	0.399984	2.23607	2.63605	0.151736
STX19	0.399984	2.23607	2.63605	0.151736
TACR3	0.399984	2.23607	2.63605	0.151736
TMEM151A	0.399984	2.23607	2.63605	0.151736
TMEM158	0.399984	2.23607	2.63605	0.151736
TRIM17	0.399984	2.23607	2.63605	0.151736
ZSCAN10	0.399984	2.23607	2.63605	0.151736
AADACL3	0.399984	2.23607	2.63605	0.151736
ABI3	0.399984	2.23607	2.63605	0.151736
ACKR3	0.399984	2.23607	2.63605	0.151736
ACSM2B	0.399984	2.23607	2.63605	0.151736
ADAMTSL2	0.399984	2.23607	2.63605	0.151736
ADAP2	0.399984	2.23607	2.63605	0.151736
ADGRB1	0.399984	2.23607	2.63605	0.151736
ADGRD2	0.399984	2.23607	2.63605	0.151736
ADORA2A	0.399984	2.23607	2.63605	0.151736
ADORA3	0.399984	2.23607	2.63605	0.151736
AHNAK2	0.399984	2.23607	2.63605	0.151736
ALX4	0.399984	2.23607	2.63605	0.151736
AMBN	0.399984	2.23607	2.63605	0.151736
ANGPTL7	0.399984	2.23607	2.63605	0.151736
ANXA10	0.399984	2.23607	2.63605	0.151736
APOA5	0.399984	2.23607	2.63605	0.151736
ARHGAP9	0.399984	2.23607	2.63605	0.151736
ASB10	0.399984	2.23607	2.63605	0.151736
ATP1B4	0.399984	2.23607	2.63605	0.151736
ATP8A2	0.399984	2.23607	2.63605	0.151736
B3GAT1	0.399984	2.23607	2.63605	0.151736
BERV-K1	0.399984	2.23607	2.63605	0.151736
BFSP1	0.399984	2.23607	2.63605	0.151736
BGLAP	0.399984	2.23607	2.63605	0.151736
BMP1	0.399984	2.23607	2.63605	0.151736
BPI	0.399984	2.23607	2.63605	0.151736
C11H2orf73	0.399984	2.23607	2.63605	0.151736
C11H9orf50	0.399984	2.23607	2.63605	0.151736
C1H21orf140	0.399984	2.23607	2.63605	0.151736
C20H5orf49	0.399984	2.23607	2.63605	0.151736
C26H10orf82	0.399984	2.23607	2.63605	0.151736
C28H10orf99	0.399984	2.23607	2.63605	0.151736
C3AR1	0.399984	2.23607	2.63605	0.151736
C4A	0.399984	2.23607	2.63605	0.151736
C7H5orf46	0.399984	2.23607	2.63605	0.151736
CA7	0.399984	2.23607	2.63605	0.151736
CABP2	0.399984	2.23607	2.63605	0.151736
CABP7	0.399984	2.23607	2.63605	0.151736
CAGE1	0.399984	2.23607	2.63605	0.151736
CAMK1D	0.399984	2.23607	2.63605	0.151736
CAMK2A	0.399984	2.23607	2.63605	0.151736
CBY3	0.399984	2.23607	2.63605	0.151736
CCDC178	0.399984	2.23607	2.63605	0.151736
CCER2	0.399984	2.23607	2.63605	0.151736
CCL5	0.399984	2.23607	2.63605	0.151736
CD163	0.399984	2.23607	2.63605	0.151736
CD24	0.399984	2.23607	2.63605	0.151736
CD5	0.399984	2.23607	2.63605	0.151736
CD86	0.399984	2.23607	2.63605	0.151736
CDHR4	0.399984	2.23607	2.63605	0.151736
CEBPA	0.399984	2.23607	2.63605	0.151736
CELA1	0.399984	2.23607	2.63605	0.151736
CEND1	0.399984	2.23607	2.63605	0.151736
CERK	0.399984	2.23607	2.63605	0.151736
CES1	0.399984	2.23607	2.63605	0.151736
CHRDL1	0.399984	2.23607	2.63605	0.151736
CHRNA2	0.399984	2.23607	2.63605	0.151736
CIAO1	0.399984	2.23607	2.63605	0.151736
CKM	0.399984	2.23607	2.63605	0.151736
CLDN3	0.399984	2.23607	2.63605	0.151736
CNTN1	0.399984	2.23607	2.63605	0.151736
CPLX4	0.399984	2.23607	2.63605	0.151736
CPVL	0.399984	2.23607	2.63605	0.151736
CREG2	0.399984	2.23607	2.63605	0.151736
CRYBA2	0.399984	2.23607	2.63605	0.151736
CRYBB3	0.399984	2.23607	2.63605	0.151736
CRYGS	0.399984	2.23607	2.63605	0.151736
CWH43	0.399984	2.23607	2.63605	0.151736
CYSLTR2	0.399984	2.23607	2.63605	0.151736
DCT	0.399984	2.23607	2.63605	0.151736
DHH	0.399984	2.23607	2.63605	0.151736
DLL1	0.399984	2.23607	2.63605	0.151736
DNAJC22	0.399984	2.23607	2.63605	0.151736
DOK3	0.399984	2.23607	2.63605	0.151736
DOK6	0.399984	2.23607	2.63605	0.151736
DYRK4	0.399984	2.23607	2.63605	0.151736
EDA2R	0.399984	2.23607	2.63605	0.151736
EN1	0.399984	2.23607	2.63605	0.151736
EPHB3	0.399984	2.23607	2.63605	0.151736
EPO	0.399984	2.23607	2.63605	0.151736
ESPNL	0.399984	2.23607	2.63605	0.151736
EVA1A	0.399984	2.23607	2.63605	0.151736
F10	0.399984	2.23607	2.63605	0.151736
FABP7	0.399984	2.23607	2.63605	0.151736
FAM131B	0.399984	2.23607	2.63605	0.151736
FAM173A	0.399984	2.23607	2.63605	0.151736
FAM69B	0.399984	2.23607	2.63605	0.151736
FAM69C	0.399984	2.23607	2.63605	0.151736
FAR2	0.399984	2.23607	2.63605	0.151736
FLT3LG	0.399984	2.23607	2.63605	0.151736
FOXA1	0.399984	2.23607	2.63605	0.151736
FOXA3	0.399984	2.23607	2.63605	0.151736
FOXD3	0.399984	2.23607	2.63605	0.151736
FOXL2	0.399984	2.23607	2.63605	0.151736
FUT6	0.399984	2.23607	2.63605	0.151736
FUT9	0.399984	2.23607	2.63605	0.151736
FXYD2	0.399984	2.23607	2.63605	0.151736
GALNT6	0.399984	2.23607	2.63605	0.151736
GALNT9	0.399984	2.23607	2.63605	0.151736
GCNA	0.399984	2.23607	2.63605	0.151736
GDF1	0.399984	2.23607	2.63605	0.151736
GFRAL	0.399984	2.23607	2.63605	0.151736
GIMD1	0.399984	2.23607	2.63605	0.151736
GIPR	0.399984	2.23607	2.63605	0.151736
GLIPR1	0.399984	2.23607	2.63605	0.151736
GLIPR1L2	0.399984	2.23607	2.63605	0.151736
GP6	0.399984	2.23607	2.63605	0.151736
GPR152	0.399984	2.23607	2.63605	0.151736
GPR82	0.399984	2.23607	2.63605	0.151736
GRIK4	0.399984	2.23607	2.63605	0.151736
GRM6	0.399984	2.23607	2.63605	0.151736
GSG1	0.399984	2.23607	2.63605	0.151736
GSG1L2	0.399984	2.23607	2.63605	0.151736
GUCA1A	0.399984	2.23607	2.63605	0.151736
HAPLN2	0.399984	2.23607	2.63605	0.151736
HCK	0.399984	2.23607	2.63605	0.151736
HDAC4	0.399984	2.23607	2.63605	0.151736
HFE	0.399984	2.23607	2.63605	0.151736
HIGD1B	0.399984	2.23607	2.63605	0.151736
HMGA2	0.399984	2.23607	2.63605	0.151736
HOXB4	0.399984	2.23607	2.63605	0.151736
HRH3	0.399984	2.23607	2.63605	0.151736
HS3ST1	0.399984	2.23607	2.63605	0.151736
HSBP1L1	0.399984	2.23607	2.63605	0.151736
HSPB8	0.399984	2.23607	2.63605	0.151736
HSPB9	0.399984	2.23607	2.63605	0.151736
HTR2A	0.399984	2.23607	2.63605	0.151736
IER5	0.399984	2.23607	2.63605	0.151736
IFN-TAU	0.399984	2.23607	2.63605	0.151736
IGF2	0.399984	2.23607	2.63605	0.151736
IGIP	0.399984	2.23607	2.63605	0.151736
IGSF6	0.399984	2.23607	2.63605	0.151736
IGSF8	0.399984	2.23607	2.63605	0.151736
IL17RE	0.399984	2.23607	2.63605	0.151736
IQANK1	0.399984	2.23607	2.63605	0.151736
IRS2	0.399984	2.23607	2.63605	0.151736
ITGAD	0.399984	2.23607	2.63605	0.151736
ITIH2	0.399984	2.23607	2.63605	0.151736
IZUMO2	0.399984	2.23607	2.63605	0.151736
IZUMO4	0.399984	2.23607	2.63605	0.151736
JAM2	0.399984	2.23607	2.63605	0.151736
JSRP1	0.399984	2.23607	2.63605	0.151736
JUP	0.399984	2.23607	2.63605	0.151736
KCNAB1	0.399984	2.23607	2.63605	0.151736
KCNB2	0.399984	2.23607	2.63605	0.151736
KCNC1	0.399984	2.23607	2.63605	0.151736
KCNH2	0.399984	2.23607	2.63605	0.151736
KCNJ14	0.399984	2.23607	2.63605	0.151736
KCNMB3	0.399984	2.23607	2.63605	0.151736
KCNT1	0.399984	2.23607	2.63605	0.151736
KLF14	0.399984	2.23607	2.63605	0.151736
KLK1	0.399984	2.23607	2.63605	0.151736
KLKB1	0.399984	2.23607	2.63605	0.151736
KRBA1	0.399984	2.23607	2.63605	0.151736
KRT31	0.399984	2.23607	2.63605	0.151736
LCN6	0.399984	2.23607	2.63605	0.151736
LGALS9	0.399984	2.23607	2.63605	0.151736
LGI4	0.399984	2.23607	2.63605	0.151736
LGR5	0.399984	2.23607	2.63605	0.151736
LIPC	0.399984	2.23607	2.63605	0.151736
LMAN1L	0.399984	2.23607	2.63605	0.151736
LOC100138009	0.399984	2.23607	2.63605	0.151736
LOC100138633	0.399984	2.23607	2.63605	0.151736
LOC100138660	0.399984	2.23607	2.63605	0.151736
LOC100139881	0.399984	2.23607	2.63605	0.151736
LOC100295922	0.399984	2.23607	2.63605	0.151736
LOC100296900	0.399984	2.23607	2.63605	0.151736
LOC100297358	0.399984	2.23607	2.63605	0.151736
LOC100299247	0.399984	2.23607	2.63605	0.151736
LOC100299995	0.399984	2.23607	2.63605	0.151736
LOC100301024	0.399984	2.23607	2.63605	0.151736
LOC100337032	0.399984	2.23607	2.63605	0.151736
LOC100337108	0.399984	2.23607	2.63605	0.151736
LOC100847104	0.399984	2.23607	2.63605	0.151736
LOC100847319	0.399984	2.23607	2.63605	0.151736
LOC100847554	0.399984	2.23607	2.63605	0.151736
LOC100847644	0.399984	2.23607	2.63605	0.151736
LOC100847661	0.399984	2.23607	2.63605	0.151736
LOC100847686	0.399984	2.23607	2.63605	0.151736
LOC100847819	0.399984	2.23607	2.63605	0.151736
LOC100848076	0.399984	2.23607	2.63605	0.151736
LOC100848105	0.399984	2.23607	2.63605	0.151736
LOC100848469	0.399984	2.23607	2.63605	0.151736
LOC100848536	0.399984	2.23607	2.63605	0.151736
LOC100848665	0.399984	2.23607	2.63605	0.151736
LOC100848685	0.399984	2.23607	2.63605	0.151736
LOC100848939	0.399984	2.23607	2.63605	0.151736
LOC101902048	0.399984	2.23607	2.63605	0.151736
LOC101902128	0.399984	2.23607	2.63605	0.151736
LOC101902234	0.399984	2.23607	2.63605	0.151736
LOC101902283	0.399984	2.23607	2.63605	0.151736
LOC101902700	0.399984	2.23607	2.63605	0.151736
LOC101902705	0.399984	2.23607	2.63605	0.151736
LOC101902793	0.399984	2.23607	2.63605	0.151736
LOC101903068	0.399984	2.23607	2.63605	0.151736
LOC101903086	0.399984	2.23607	2.63605	0.151736
LOC101903087	0.399984	2.23607	2.63605	0.151736
LOC101903138	0.399984	2.23607	2.63605	0.151736
LOC101903248	0.399984	2.23607	2.63605	0.151736
LOC101903454	0.399984	2.23607	2.63605	0.151736
LOC101903506	0.399984	2.23607	2.63605	0.151736
LOC101903574	0.399984	2.23607	2.63605	0.151736
LOC101903604	0.399984	2.23607	2.63605	0.151736
LOC101903749	0.399984	2.23607	2.63605	0.151736
LOC101903752	0.399984	2.23607	2.63605	0.151736
LOC101904013	0.399984	2.23607	2.63605	0.151736
LOC101904174	0.399984	2.23607	2.63605	0.151736
LOC101904266	0.399984	2.23607	2.63605	0.151736
LOC101904303	0.399984	2.23607	2.63605	0.151736
LOC101904350	0.399984	2.23607	2.63605	0.151736
LOC101904498	0.399984	2.23607	2.63605	0.151736
LOC101904591	0.399984	2.23607	2.63605	0.151736
LOC101904614	0.399984	2.23607	2.63605	0.151736
LOC101904647	0.399984	2.23607	2.63605	0.151736
LOC101905099	0.399984	2.23607	2.63605	0.151736
LOC101905162	0.399984	2.23607	2.63605	0.151736
LOC101905238	0.399984	2.23607	2.63605	0.151736
LOC101905267	0.399984	2.23607	2.63605	0.151736
LOC101905427	0.399984	2.23607	2.63605	0.151736
LOC101905651	0.399984	2.23607	2.63605	0.151736
LOC101905925	0.399984	2.23607	2.63605	0.151736
LOC101906171	0.399984	2.23607	2.63605	0.151736
LOC101906286	0.399984	2.23607	2.63605	0.151736
LOC101906363	0.399984	2.23607	2.63605	0.151736
LOC101906484	0.399984	2.23607	2.63605	0.151736
LOC101906512	0.399984	2.23607	2.63605	0.151736
LOC101906531	0.399984	2.23607	2.63605	0.151736
LOC101906632	0.399984	2.23607	2.63605	0.151736
LOC101906850	0.399984	2.23607	2.63605	0.151736
LOC101906863	0.399984	2.23607	2.63605	0.151736
LOC101906901	0.399984	2.23607	2.63605	0.151736
LOC101906914	0.399984	2.23607	2.63605	0.151736
LOC101906985	0.399984	2.23607	2.63605	0.151736
LOC101907006	0.399984	2.23607	2.63605	0.151736
LOC101907142	0.399984	2.23607	2.63605	0.151736
LOC101907189	0.399984	2.23607	2.63605	0.151736
LOC101907330	0.399984	2.23607	2.63605	0.151736
LOC101907342	0.399984	2.23607	2.63605	0.151736
LOC101907394	0.399984	2.23607	2.63605	0.151736
LOC101907515	0.399984	2.23607	2.63605	0.151736
LOC101907615	0.399984	2.23607	2.63605	0.151736
LOC101907658	0.399984	2.23607	2.63605	0.151736
LOC101907729	0.399984	2.23607	2.63605	0.151736
LOC101907913	0.399984	2.23607	2.63605	0.151736
LOC101907959	0.399984	2.23607	2.63605	0.151736
LOC101908046	0.399984	2.23607	2.63605	0.151736
LOC101908149	0.399984	2.23607	2.63605	0.151736
LOC101908286	0.399984	2.23607	2.63605	0.151736
LOC101908350	0.399984	2.23607	2.63605	0.151736
LOC104968518	0.399984	2.23607	2.63605	0.151736
LOC104968526	0.399984	2.23607	2.63605	0.151736
LOC104968891	0.399984	2.23607	2.63605	0.151736
LOC104968898	0.399984	2.23607	2.63605	0.151736
LOC104969022	0.399984	2.23607	2.63605	0.151736
LOC104969036	0.399984	2.23607	2.63605	0.151736
LOC104969302	0.399984	2.23607	2.63605	0.151736
LOC104970103	0.399984	2.23607	2.63605	0.151736
LOC104970249	0.399984	2.23607	2.63605	0.151736
LOC104970268	0.399984	2.23607	2.63605	0.151736
LOC104970752	0.399984	2.23607	2.63605	0.151736
LOC104970815	0.399984	2.23607	2.63605	0.151736
LOC104970976	0.399984	2.23607	2.63605	0.151736
LOC104971177	0.399984	2.23607	2.63605	0.151736
LOC104971180	0.399984	2.23607	2.63605	0.151736
LOC104971390	0.399984	2.23607	2.63605	0.151736
LOC104971676	0.399984	2.23607	2.63605	0.151736
LOC104972252	0.399984	2.23607	2.63605	0.151736
LOC104972322	0.399984	2.23607	2.63605	0.151736
LOC104972390	0.399984	2.23607	2.63605	0.151736
LOC104972401	0.399984	2.23607	2.63605	0.151736
LOC104972477	0.399984	2.23607	2.63605	0.151736
LOC104972592	0.399984	2.23607	2.63605	0.151736
LOC104972787	0.399984	2.23607	2.63605	0.151736
LOC104972888	0.399984	2.23607	2.63605	0.151736
LOC104973118	0.399984	2.23607	2.63605	0.151736
LOC104973122	0.399984	2.23607	2.63605	0.151736
LOC104973209	0.399984	2.23607	2.63605	0.151736
LOC104973233	0.399984	2.23607	2.63605	0.151736
LOC104973252	0.399984	2.23607	2.63605	0.151736
LOC104973650	0.399984	2.23607	2.63605	0.151736
LOC104973746	0.399984	2.23607	2.63605	0.151736
LOC104974297	0.399984	2.23607	2.63605	0.151736
LOC104974340	0.399984	2.23607	2.63605	0.151736
LOC104974905	0.399984	2.23607	2.63605	0.151736
LOC104974975	0.399984	2.23607	2.63605	0.151736
LOC104975198	0.399984	2.23607	2.63605	0.151736
LOC104975756	0.399984	2.23607	2.63605	0.151736
LOC104975811	0.399984	2.23607	2.63605	0.151736
LOC104975814	0.399984	2.23607	2.63605	0.151736
LOC104975906	0.399984	2.23607	2.63605	0.151736
LOC104976077	0.399984	2.23607	2.63605	0.151736
LOC104976078	0.399984	2.23607	2.63605	0.151736
LOC104976281	0.399984	2.23607	2.63605	0.151736
LOC104976302	0.399984	2.23607	2.63605	0.151736
LOC104976783	0.399984	2.23607	2.63605	0.151736
LOC107131416	0.399984	2.23607	2.63605	0.151736
LOC107131516	0.399984	2.23607	2.63605	0.151736
LOC107131642	0.399984	2.23607	2.63605	0.151736
LOC107131648	0.399984	2.23607	2.63605	0.151736
LOC107131659	0.399984	2.23607	2.63605	0.151736
LOC107131715	0.399984	2.23607	2.63605	0.151736
LOC107131840	0.399984	2.23607	2.63605	0.151736
LOC107131885	0.399984	2.23607	2.63605	0.151736
LOC107131992	0.399984	2.23607	2.63605	0.151736
LOC107132070	0.399984	2.23607	2.63605	0.151736
LOC107132328	0.399984	2.23607	2.63605	0.151736
LOC107132358	0.399984	2.23607	2.63605	0.151736
LOC107132378	0.399984	2.23607	2.63605	0.151736
LOC107132465	0.399984	2.23607	2.63605	0.151736
LOC107132523	0.399984	2.23607	2.63605	0.151736
LOC107132714	0.399984	2.23607	2.63605	0.151736
LOC107132852	0.399984	2.23607	2.63605	0.151736
LOC107132854	0.399984	2.23607	2.63605	0.151736
LOC107132919	0.399984	2.23607	2.63605	0.151736
LOC107132928	0.399984	2.23607	2.63605	0.151736
LOC107132945	0.399984	2.23607	2.63605	0.151736
LOC107132961	0.399984	2.23607	2.63605	0.151736
LOC107133049	0.399984	2.23607	2.63605	0.151736
LOC107133264	0.399984	2.23607	2.63605	0.151736
LOC112441469	0.399984	2.23607	2.63605	0.151736
LOC112441483	0.399984	2.23607	2.63605	0.151736
LOC112441505	0.399984	2.23607	2.63605	0.151736
LOC112441538	0.399984	2.23607	2.63605	0.151736
LOC112441628	0.399984	2.23607	2.63605	0.151736
LOC112441638	0.399984	2.23607	2.63605	0.151736
LOC112441829	0.399984	2.23607	2.63605	0.151736
LOC112441843	0.399984	2.23607	2.63605	0.151736
LOC112441857	0.399984	2.23607	2.63605	0.151736
LOC112441868	0.399984	2.23607	2.63605	0.151736
LOC112442016	0.399984	2.23607	2.63605	0.151736
LOC112442017	0.399984	2.23607	2.63605	0.151736
LOC112442079	0.399984	2.23607	2.63605	0.151736
LOC112442202	0.399984	2.23607	2.63605	0.151736
LOC112442273	0.399984	2.23607	2.63605	0.151736
LOC112442312	0.399984	2.23607	2.63605	0.151736
LOC112442313	0.399984	2.23607	2.63605	0.151736
LOC112442314	0.399984	2.23607	2.63605	0.151736
LOC112442336	0.399984	2.23607	2.63605	0.151736
LOC112442350	0.399984	2.23607	2.63605	0.151736
LOC112442387	0.399984	2.23607	2.63605	0.151736
LOC112442543	0.399984	2.23607	2.63605	0.151736
LOC112442613	0.399984	2.23607	2.63605	0.151736
LOC112442634	0.399984	2.23607	2.63605	0.151736
LOC112442636	0.399984	2.23607	2.63605	0.151736
LOC112442662	0.399984	2.23607	2.63605	0.151736
LOC112442678	0.399984	2.23607	2.63605	0.151736
LOC112442689	0.399984	2.23607	2.63605	0.151736
LOC112442714	0.399984	2.23607	2.63605	0.151736
LOC112442721	0.399984	2.23607	2.63605	0.151736
LOC112443117	0.399984	2.23607	2.63605	0.151736
LOC112443152	0.399984	2.23607	2.63605	0.151736
LOC112443206	0.399984	2.23607	2.63605	0.151736
LOC112443412	0.399984	2.23607	2.63605	0.151736
LOC112443433	0.399984	2.23607	2.63605	0.151736
LOC112443438	0.399984	2.23607	2.63605	0.151736
LOC112443459	0.399984	2.23607	2.63605	0.151736
LOC112443460	0.399984	2.23607	2.63605	0.151736
LOC112443469	0.399984	2.23607	2.63605	0.151736
LOC112443489	0.399984	2.23607	2.63605	0.151736
LOC112443503	0.399984	2.23607	2.63605	0.151736
LOC112443722	0.399984	2.23607	2.63605	0.151736
LOC112443768	0.399984	2.23607	2.63605	0.151736
LOC112443801	0.399984	2.23607	2.63605	0.151736
LOC112443839	0.399984	2.23607	2.63605	0.151736
LOC112443840	0.399984	2.23607	2.63605	0.151736
LOC112443843	0.399984	2.23607	2.63605	0.151736
LOC112444170	0.399984	2.23607	2.63605	0.151736
LOC112444285	0.399984	2.23607	2.63605	0.151736
LOC112444295	0.399984	2.23607	2.63605	0.151736
LOC112444308	0.399984	2.23607	2.63605	0.151736
LOC112444493	0.399984	2.23607	2.63605	0.151736
LOC112444523	0.399984	2.23607	2.63605	0.151736
LOC112444587	0.399984	2.23607	2.63605	0.151736
LOC112444598	0.399984	2.23607	2.63605	0.151736
LOC112444610	0.399984	2.23607	2.63605	0.151736
LOC112444737	0.399984	2.23607	2.63605	0.151736
LOC112444753	0.399984	2.23607	2.63605	0.151736
LOC112444859	0.399984	2.23607	2.63605	0.151736
LOC112444868	0.399984	2.23607	2.63605	0.151736
LOC112445003	0.399984	2.23607	2.63605	0.151736
LOC112445011	0.399984	2.23607	2.63605	0.151736
LOC112445012	0.399984	2.23607	2.63605	0.151736
LOC112445096	0.399984	2.23607	2.63605	0.151736
LOC112445104	0.399984	2.23607	2.63605	0.151736
LOC112445113	0.399984	2.23607	2.63605	0.151736
LOC112445162	0.399984	2.23607	2.63605	0.151736
LOC112445167	0.399984	2.23607	2.63605	0.151736
LOC112445859	0.399984	2.23607	2.63605	0.151736
LOC112445872	0.399984	2.23607	2.63605	0.151736
LOC112445941	0.399984	2.23607	2.63605	0.151736
LOC112445962	0.399984	2.23607	2.63605	0.151736
LOC112446010	0.399984	2.23607	2.63605	0.151736
LOC112446054	0.399984	2.23607	2.63605	0.151736
LOC112446116	0.399984	2.23607	2.63605	0.151736
LOC112446323	0.399984	2.23607	2.63605	0.151736
LOC112446385	0.399984	2.23607	2.63605	0.151736
LOC112446418	0.399984	2.23607	2.63605	0.151736
LOC112446429	0.399984	2.23607	2.63605	0.151736
LOC112446466	0.399984	2.23607	2.63605	0.151736
LOC112446480	0.399984	2.23607	2.63605	0.151736
LOC112446482	0.399984	2.23607	2.63605	0.151736
LOC112446627	0.399984	2.23607	2.63605	0.151736
LOC112446663	0.399984	2.23607	2.63605	0.151736
LOC112446678	0.399984	2.23607	2.63605	0.151736
LOC112446710	0.399984	2.23607	2.63605	0.151736
LOC112446723	0.399984	2.23607	2.63605	0.151736
LOC112446758	0.399984	2.23607	2.63605	0.151736
LOC112446761	0.399984	2.23607	2.63605	0.151736
LOC112446773	0.399984	2.23607	2.63605	0.151736
LOC112446780	0.399984	2.23607	2.63605	0.151736
LOC112446882	0.399984	2.23607	2.63605	0.151736
LOC112446995	0.399984	2.23607	2.63605	0.151736
LOC112447029	0.399984	2.23607	2.63605	0.151736
LOC112447043	0.399984	2.23607	2.63605	0.151736
LOC112447056	0.399984	2.23607	2.63605	0.151736
LOC112447112	0.399984	2.23607	2.63605	0.151736
LOC112447148	0.399984	2.23607	2.63605	0.151736
LOC112447150	0.399984	2.23607	2.63605	0.151736
LOC112447338	0.399984	2.23607	2.63605	0.151736
LOC112447349	0.399984	2.23607	2.63605	0.151736
LOC112447367	0.399984	2.23607	2.63605	0.151736
LOC112447405	0.399984	2.23607	2.63605	0.151736
LOC112447452	0.399984	2.23607	2.63605	0.151736
LOC112447467	0.399984	2.23607	2.63605	0.151736
LOC112447539	0.399984	2.23607	2.63605	0.151736
LOC112447543	0.399984	2.23607	2.63605	0.151736
LOC112447558	0.399984	2.23607	2.63605	0.151736
LOC112447564	0.399984	2.23607	2.63605	0.151736
LOC112447740	0.399984	2.23607	2.63605	0.151736
LOC112447789	0.399984	2.23607	2.63605	0.151736
LOC112447791	0.399984	2.23607	2.63605	0.151736
LOC112447808	0.399984	2.23607	2.63605	0.151736
LOC112447826	0.399984	2.23607	2.63605	0.151736
LOC112447828	0.399984	2.23607	2.63605	0.151736
LOC112447836	0.399984	2.23607	2.63605	0.151736
LOC112447891	0.399984	2.23607	2.63605	0.151736
LOC112448043	0.399984	2.23607	2.63605	0.151736
LOC112448052	0.399984	2.23607	2.63605	0.151736
LOC112448068	0.399984	2.23607	2.63605	0.151736
LOC112448084	0.399984	2.23607	2.63605	0.151736
LOC112448368	0.399984	2.23607	2.63605	0.151736
LOC112448493	0.399984	2.23607	2.63605	0.151736
LOC112448534	0.399984	2.23607	2.63605	0.151736
LOC112448548	0.399984	2.23607	2.63605	0.151736
LOC112448568	0.399984	2.23607	2.63605	0.151736
LOC112448735	0.399984	2.23607	2.63605	0.151736
LOC112448762	0.399984	2.23607	2.63605	0.151736
LOC112448778	0.399984	2.23607	2.63605	0.151736
LOC112448837	0.399984	2.23607	2.63605	0.151736
LOC112448854	0.399984	2.23607	2.63605	0.151736
LOC112449045	0.399984	2.23607	2.63605	0.151736
LOC112449072	0.399984	2.23607	2.63605	0.151736
LOC112449083	0.399984	2.23607	2.63605	0.151736
LOC112449106	0.399984	2.23607	2.63605	0.151736
LOC112449110	0.399984	2.23607	2.63605	0.151736
LOC112449261	0.399984	2.23607	2.63605	0.151736
LOC112449263	0.399984	2.23607	2.63605	0.151736
LOC112449295	0.399984	2.23607	2.63605	0.151736
LOC112449325	0.399984	2.23607	2.63605	0.151736
LOC112449332	0.399984	2.23607	2.63605	0.151736
LOC112449337	0.399984	2.23607	2.63605	0.151736
LOC112449512	0.399984	2.23607	2.63605	0.151736
LOC504858	0.399984	2.23607	2.63605	0.151736
LOC507184	0.399984	2.23607	2.63605	0.151736
LOC508646	0.399984	2.23607	2.63605	0.151736
LOC509356	0.399984	2.23607	2.63605	0.151736
LOC509911	0.399984	2.23607	2.63605	0.151736
LOC511401	0.399984	2.23607	2.63605	0.151736
LOC515000	0.399984	2.23607	2.63605	0.151736
LOC516421	0.399984	2.23607	2.63605	0.151736
LOC516442	0.399984	2.23607	2.63605	0.151736
LOC516870	0.399984	2.23607	2.63605	0.151736
LOC518027	0.399984	2.23607	2.63605	0.151736
LOC518464	0.399984	2.23607	2.63605	0.151736
LOC519132	0.399984	2.23607	2.63605	0.151736
LOC519492	0.399984	2.23607	2.63605	0.151736
LOC521092	0.399984	2.23607	2.63605	0.151736
LOC523139	0.399984	2.23607	2.63605	0.151736
LOC526769	0.399984	2.23607	2.63605	0.151736
LOC529488	0.399984	2.23607	2.63605	0.151736
LOC530689	0.399984	2.23607	2.63605	0.151736
LOC530929	0.399984	2.23607	2.63605	0.151736
LOC532436	0.399984	2.23607	2.63605	0.151736
LOC536097	0.399984	2.23607	2.63605	0.151736
LOC536739	0.399984	2.23607	2.63605	0.151736
LOC539064	0.399984	2.23607	2.63605	0.151736
LOC613441	0.399984	2.23607	2.63605	0.151736
LOC615768	0.399984	2.23607	2.63605	0.151736
LOC616519	0.399984	2.23607	2.63605	0.151736
LOC617043	0.399984	2.23607	2.63605	0.151736
LOC617112	0.399984	2.23607	2.63605	0.151736
LOC618112	0.399984	2.23607	2.63605	0.151736
LOC618220	0.399984	2.23607	2.63605	0.151736
LOC781324	0.399984	2.23607	2.63605	0.151736
LOC781423	0.399984	2.23607	2.63605	0.151736
LOC781635	0.399984	2.23607	2.63605	0.151736
LOC782261	0.399984	2.23607	2.63605	0.151736
LOC782348	0.399984	2.23607	2.63605	0.151736
LOC782781	0.399984	2.23607	2.63605	0.151736
LOC783151	0.399984	2.23607	2.63605	0.151736
LOC783202	0.399984	2.23607	2.63605	0.151736
LOC783224	0.399984	2.23607	2.63605	0.151736
LOC783535	0.399984	2.23607	2.63605	0.151736
LOC783730	0.399984	2.23607	2.63605	0.151736
LOC784185	0.399984	2.23607	2.63605	0.151736
LOC785370	0.399984	2.23607	2.63605	0.151736
LOC785981	0.399984	2.23607	2.63605	0.151736
LOC786386	0.399984	2.23607	2.63605	0.151736
LOC787343	0.399984	2.23607	2.63605	0.151736
LOC787465	0.399984	2.23607	2.63605	0.151736
LOC787476	0.399984	2.23607	2.63605	0.151736
LOC789018	0.399984	2.23607	2.63605	0.151736
LRRC55	0.399984	2.23607	2.63605	0.151736
LRRIQ3	0.399984	2.23607	2.63605	0.151736
LTB4R2	0.399984	2.23607	2.63605	0.151736
LYPD2	0.399984	2.23607	2.63605	0.151736
LYPD8	0.399984	2.23607	2.63605	0.151736
LZTS1	0.399984	2.23607	2.63605	0.151736
MAGED1	0.399984	2.23607	2.63605	0.151736
MAP1LC3C	0.399984	2.23607	2.63605	0.151736
MAP3K19	0.399984	2.23607	2.63605	0.151736
MDH1B	0.399984	2.23607	2.63605	0.151736
METRN	0.399984	2.23607	2.63605	0.151736
MFAP4	0.399984	2.23607	2.63605	0.151736
MGAM	0.399984	2.23607	2.63605	0.151736
MGC126945	0.399984	2.23607	2.63605	0.151736
MGC148318	0.399984	2.23607	2.63605	0.151736
MGP	0.399984	2.23607	2.63605	0.151736
MISP	0.399984	2.23607	2.63605	0.151736
MKRN2OS	0.399984	2.23607	2.63605	0.151736
MPPED2	0.399984	2.23607	2.63605	0.151736
MSGN1	0.399984	2.23607	2.63605	0.151736
MT1E	0.399984	2.23607	2.63605	0.151736
MUSTN1	0.399984	2.23607	2.63605	0.151736
MYC	0.399984	2.23607	2.63605	0.151736
NCR3	0.399984	2.23607	2.63605	0.151736
NKX2-1	0.399984	2.23607	2.63605	0.151736
NPAS1	0.399984	2.23607	2.63605	0.151736
NRL	0.399984	2.23607	2.63605	0.151736
NTN5	0.399984	2.23607	2.63605	0.151736
NUP210	0.399984	2.23607	2.63605	0.151736
NXPH3	0.399984	2.23607	2.63605	0.151736
OPLAH	0.399984	2.23607	2.63605	0.151736
OPRK1	0.399984	2.23607	2.63605	0.151736
OR4C3	0.399984	2.23607	2.63605	0.151736
OSR1	0.399984	2.23607	2.63605	0.151736
OTOP3	0.399984	2.23607	2.63605	0.151736
OVOL3	0.399984	2.23607	2.63605	0.151736
P2RY13	0.399984	2.23607	2.63605	0.151736
PAX5	0.399984	2.23607	2.63605	0.151736
PCP2	0.399984	2.23607	2.63605	0.151736
PCSK2	0.399984	2.23607	2.63605	0.151736
PDE4C	0.399984	2.23607	2.63605	0.151736
PDZK1IP1	0.399984	2.23607	2.63605	0.151736
PHGDH	0.399984	2.23607	2.63605	0.151736
PIK3CG	0.399984	2.23607	2.63605	0.151736
PIRT	0.399984	2.23607	2.63605	0.151736
PKHD1	0.399984	2.23607	2.63605	0.151736
PLAU	0.399984	2.23607	2.63605	0.151736
PLIN1	0.399984	2.23607	2.63605	0.151736
POM121L2	0.399984	2.23607	2.63605	0.151736
POU6F2	0.399984	2.23607	2.63605	0.151736
PRAC2	0.399984	2.23607	2.63605	0.151736
PRG3	0.399984	2.23607	2.63605	0.151736
PRP2	0.399984	2.23607	2.63605	0.151736
PRPH	0.399984	2.23607	2.63605	0.151736
PRSS12	0.399984	2.23607	2.63605	0.151736
PRSS48	0.399984	2.23607	2.63605	0.151736
PRSS58	0.399984	2.23607	2.63605	0.151736
PRTN3	0.399984	2.23607	2.63605	0.151736
PTCHD1	0.399984	2.23607	2.63605	0.151736
PTH1R	0.399984	2.23607	2.63605	0.151736
PTH2R	0.399984	2.23607	2.63605	0.151736
QRFP	0.399984	2.23607	2.63605	0.151736
R3HCC1	0.399984	2.23607	2.63605	0.151736
RAB11FIP1	0.399984	2.23607	2.63605	0.151736
RBKS	0.399984	2.23607	2.63605	0.151736
REC8	0.399984	2.23607	2.63605	0.151736
REG3A	0.399984	2.23607	2.63605	0.151736
RFX4	0.399984	2.23607	2.63605	0.151736
RGR	0.399984	2.23607	2.63605	0.151736
RGS21	0.399984	2.23607	2.63605	0.151736
RHBDL1	0.399984	2.23607	2.63605	0.151736
RIMBP3B	0.399984	2.23607	2.63605	0.151736
RNF175	0.399984	2.23607	2.63605	0.151736
RNF225	0.399984	2.23607	2.63605	0.151736
ROPN1	0.399984	2.23607	2.63605	0.151736
RPRM	0.399984	2.23607	2.63605	0.151736
RPS6KA4	0.399984	2.23607	2.63605	0.151736
RTL5	0.399984	2.23607	2.63605	0.151736
SAP25	0.399984	2.23607	2.63605	0.151736
SCGB1A1	0.399984	2.23607	2.63605	0.151736
SCNN1D	0.399984	2.23607	2.63605	0.151736
SEC14L6	0.399984	2.23607	2.63605	0.151736
SEMA4C	0.399984	2.23607	2.63605	0.151736
SEMA6B	0.399984	2.23607	2.63605	0.151736
SERPINB12	0.399984	2.23607	2.63605	0.151736
SGK2	0.399984	2.23607	2.63605	0.151736
SIGLEC10	0.399984	2.23607	2.63605	0.151736
SLC15A2	0.399984	2.23607	2.63605	0.151736
SLC25A45	0.399984	2.23607	2.63605	0.151736
SLC39A5	0.399984	2.23607	2.63605	0.151736
SLC4A5	0.399984	2.23607	2.63605	0.151736
SLC5A12	0.399984	2.23607	2.63605	0.151736
SLC6A13	0.399984	2.23607	2.63605	0.151736
SLC6A6	0.399984	2.23607	2.63605	0.151736
SLCO5A1	0.399984	2.23607	2.63605	0.151736
SMIM37	0.399984	2.23607	2.63605	0.151736
SMLR1	0.399984	2.23607	2.63605	0.151736
SNCG	0.399984	2.23607	2.63605	0.151736
SNED1	0.399984	2.23607	2.63605	0.151736
SNTG1	0.399984	2.23607	2.63605	0.151736
SPACA3	0.399984	2.23607	2.63605	0.151736
SPATA1	0.399984	2.23607	2.63605	0.151736
SPATA25	0.399984	2.23607	2.63605	0.151736
SPEM1	0.399984	2.23607	2.63605	0.151736
SPO11	0.399984	2.23607	2.63605	0.151736
SPRN	0.399984	2.23607	2.63605	0.151736
SSPO	0.399984	2.23607	2.63605	0.151736
SYNDIG1	0.399984	2.23607	2.63605	0.151736
TAGLN3	0.399984	2.23607	2.63605	0.151736
TARP	0.399984	2.23607	2.63605	0.151736
TBC1D21	0.399984	2.23607	2.63605	0.151736
TEAD4	0.399984	2.23607	2.63605	0.151736
TEF	0.399984	2.23607	2.63605	0.151736
TEX29	0.399984	2.23607	2.63605	0.151736
TFAP2C	0.399984	2.23607	2.63605	0.151736
TFPI2	0.399984	2.23607	2.63605	0.151736
THSD4	0.399984	2.23607	2.63605	0.151736
TLX2	0.399984	2.23607	2.63605	0.151736
TMC6	0.399984	2.23607	2.63605	0.151736
TMCO5A	0.399984	2.23607	2.63605	0.151736
TMEM17	0.399984	2.23607	2.63605	0.151736
TMEM174	0.399984	2.23607	2.63605	0.151736
TMEM184A	0.399984	2.23607	2.63605	0.151736
TMEM215	0.399984	2.23607	2.63605	0.151736
TMEM255A	0.399984	2.23607	2.63605	0.151736
TMPRSS2	0.399984	2.23607	2.63605	0.151736
TMPRSS5	0.399984	2.23607	2.63605	0.151736
TNFSF4	0.399984	2.23607	2.63605	0.151736
TNR	0.399984	2.23607	2.63605	0.151736
TNXB	0.399984	2.23607	2.63605	0.151736
TRAPPC6A	0.399984	2.23607	2.63605	0.151736
TRIML1	0.399984	2.23607	2.63605	0.151736
TSGA10IP	0.399984	2.23607	2.63605	0.151736
TSPOAP1	0.399984	2.23607	2.63605	0.151736
TTBK1	0.399984	2.23607	2.63605	0.151736
TTR	0.399984	2.23607	2.63605	0.151736
TUBGCP6	0.399984	2.23607	2.63605	0.151736
UPK3BL1	0.399984	2.23607	2.63605	0.151736
USHBP1	0.399984	2.23607	2.63605	0.151736
VAMP5	0.399984	2.23607	2.63605	0.151736
VGF	0.399984	2.23607	2.63605	0.151736
VIP	0.399984	2.23607	2.63605	0.151736
VSTM4	0.399984	2.23607	2.63605	0.151736
VWA1	0.399984	2.23607	2.63605	0.151736
VWC2	0.399984	2.23607	2.63605	0.151736
WBP1	0.399984	2.23607	2.63605	0.151736
WNT2	0.399984	2.23607	2.63605	0.151736
XYLT1	0.399984	2.23607	2.63605	0.151736
YIPF7	0.399984	2.23607	2.63605	0.151736
ZBTB12	0.399984	2.23607	2.63605	0.151736
ZC3H12D	0.399984	2.23607	2.63605	0.151736
ZDHHC14	0.399984	2.23607	2.63605	0.151736
PCDHGB4	0.39999	2.23607	2.63606	0.151738
ATP6V1G2	0.399992	2.23607	2.63606	0.151739
B3GAT2	0.399992	2.23607	2.63606	0.151739
C3H1orf216	0.399992	2.23607	2.63606	0.151739
DOC2G	0.399992	2.23607	2.63606	0.151739
FOXP3	0.399992	2.23607	2.63606	0.151739
LOC100140403	0.399992	2.23607	2.63606	0.151739
LOC101904366	0.399992	2.23607	2.63606	0.151739
LOC101909028	0.399992	2.23607	2.63606	0.151739
LOC104971926	0.399992	2.23607	2.63606	0.151739
LOC104973318	0.399992	2.23607	2.63606	0.151739
LOC112448492	0.399992	2.23607	2.63606	0.151739
LPL	0.399992	2.23607	2.63606	0.151739
MME	0.399992	2.23607	2.63606	0.151739
MYT1L	0.399992	2.23607	2.63606	0.151739
TRHR	0.399992	2.23607	2.63606	0.151739
C7	0.399992	2.23607	2.63606	0.151739
CGRRF1	0.399992	2.23607	2.63606	0.151739
CHD5	0.399992	2.23607	2.63606	0.151739
DACT3	0.399992	2.23607	2.63606	0.151739
DLK1	0.399992	2.23607	2.63606	0.151739
DUOXA2	0.399992	2.23607	2.63606	0.151739
ELSPBP1	0.399992	2.23607	2.63606	0.151739
FREM2	0.399992	2.23607	2.63606	0.151739
GAL	0.399992	2.23607	2.63606	0.151739
HOXC8	0.399992	2.23607	2.63606	0.151739
IGDCC4	0.399992	2.23607	2.63606	0.151739
LOC100299783	0.399992	2.23607	2.63606	0.151739
LOC100336222	0.399992	2.23607	2.63606	0.151739
LOC100847677	0.399992	2.23607	2.63606	0.151739
LOC100849762	0.399992	2.23607	2.63606	0.151739
LOC101903265	0.399992	2.23607	2.63606	0.151739
LOC101907275	0.399992	2.23607	2.63606	0.151739
LOC104973215	0.399992	2.23607	2.63606	0.151739
LOC107131363	0.399992	2.23607	2.63606	0.151739
LOC112444582	0.399992	2.23607	2.63606	0.151739
LOC112446019	0.399992	2.23607	2.63606	0.151739
LOC112446351	0.399992	2.23607	2.63606	0.151739
LOC112447486	0.399992	2.23607	2.63606	0.151739
LOC112449075	0.399992	2.23607	2.63606	0.151739
LOC519145	0.399992	2.23607	2.63606	0.151739
LOC615697	0.399992	2.23607	2.63606	0.151739
LURAP1L	0.399992	2.23607	2.63606	0.151739
METTL17	0.399992	2.23607	2.63606	0.151739
MS4A7	0.399992	2.23607	2.63606	0.151739
NLRP3	0.399992	2.23607	2.63606	0.151739
PGR	0.399992	2.23607	2.63606	0.151739
ROBO4	0.399992	2.23607	2.63606	0.151739
SEMA5B	0.399992	2.23607	2.63606	0.151739
SH2D6	0.399992	2.23607	2.63606	0.151739
SLC52A3	0.399992	2.23607	2.63606	0.151739
TIGD3	0.399992	2.23607	2.63606	0.151739
UGT1A1	0.399992	2.23607	2.63606	0.151739
ACP5	0.399992	2.23607	2.63606	0.151739
ADH1C	0.399992	2.23607	2.63606	0.151739
AKNA	0.399992	2.23607	2.63606	0.151739
ANKAR	0.399992	2.23607	2.63606	0.151739
ANKRD23	0.399992	2.23607	2.63606	0.151739
C11H2orf81	0.399992	2.23607	2.63606	0.151739
CCM2L	0.399992	2.23607	2.63606	0.151739
CYP1A1	0.399992	2.23607	2.63606	0.151739
EXD3	0.399992	2.23607	2.63606	0.151739
IRX6	0.399992	2.23607	2.63606	0.151739
KCNIP4	0.399992	2.23607	2.63606	0.151739
LOC100336907	0.399992	2.23607	2.63606	0.151739
LOC100848319	0.399992	2.23607	2.63606	0.151739
LOC100848851	0.399992	2.23607	2.63606	0.151739
LOC101901900	0.399992	2.23607	2.63606	0.151739
LOC101904396	0.399992	2.23607	2.63606	0.151739
LOC101907404	0.399992	2.23607	2.63606	0.151739
LOC107131496	0.399992	2.23607	2.63606	0.151739
LOC112443492	0.399992	2.23607	2.63606	0.151739
LOC112444922	0.399992	2.23607	2.63606	0.151739
LOC112445197	0.399992	2.23607	2.63606	0.151739
LOC112446332	0.399992	2.23607	2.63606	0.151739
LOC112447501	0.399992	2.23607	2.63606	0.151739
LOC112447730	0.399992	2.23607	2.63606	0.151739
LOC112449370	0.399992	2.23607	2.63606	0.151739
LOC523458	0.399992	2.23607	2.63606	0.151739
LOC783461	0.399992	2.23607	2.63606	0.151739
MARVELD1	0.399992	2.23607	2.63606	0.151739
NKX2-3	0.399992	2.23607	2.63606	0.151739
PPP2R5A	0.399992	2.23607	2.63606	0.151739
RNASE13	0.399992	2.23607	2.63606	0.151739
RXFP3	0.399992	2.23607	2.63606	0.151739
SYNE3	0.399992	2.23607	2.63606	0.151739
ZNF285	0.399992	2.23607	2.63606	0.151739
CCKAR	0.399992	2.23607	2.63606	0.151739
CSF2RA	0.399992	2.23607	2.63606	0.151739
CTF1	0.399992	2.23607	2.63606	0.151739
ELAC1	0.399992	2.23607	2.63606	0.151739
LOC100139363	0.399992	2.23607	2.63606	0.151739
LOC100336941	0.399992	2.23607	2.63606	0.151739
LOC101904500	0.399992	2.23607	2.63606	0.151739
LOC101906903	0.399992	2.23607	2.63606	0.151739
LOC112445126	0.399992	2.23607	2.63606	0.151739
LOC112446393	0.399992	2.23607	2.63606	0.151739
LOC112448859	0.399992	2.23607	2.63606	0.151739
LOC787694	0.399992	2.23607	2.63606	0.151739
PNMT	0.399992	2.23607	2.63606	0.151739
PPM1F	0.399992	2.23607	2.63606	0.151739
PQLC1	0.399992	2.23607	2.63606	0.151739
SLC5A7	0.399992	2.23607	2.63606	0.151739
SMCP	0.399992	2.23607	2.63606	0.151739
STMN3	0.399992	2.23607	2.63606	0.151739
TMEM114	0.399992	2.23607	2.63606	0.151739
ABCA9	0.399992	2.23607	2.63606	0.151739
ADAMDEC1	0.399992	2.23607	2.63606	0.151739
ADAMTS8	0.399992	2.23607	2.63606	0.151739
ADCY10	0.399992	2.23607	2.63606	0.151739
AIFM2	0.399992	2.23607	2.63606	0.151739
ALB	0.399992	2.23607	2.63606	0.151739
AREG	0.399992	2.23607	2.63606	0.151739
ARGFX	0.399992	2.23607	2.63606	0.151739
ATP2A1	0.399992	2.23607	2.63606	0.151739
BDKRB1	0.399992	2.23607	2.63606	0.151739
BLVRB	0.399992	2.23607	2.63606	0.151739
C22H3orf84	0.399992	2.23607	2.63606	0.151739
C23H6orf132	0.399992	2.23607	2.63606	0.151739
C2H2orf72	0.399992	2.23607	2.63606	0.151739
CACNA1G	0.399992	2.23607	2.63606	0.151739
CACNG1	0.399992	2.23607	2.63606	0.151739
CAMK2N2	0.399992	2.23607	2.63606	0.151739
CCDC110	0.399992	2.23607	2.63606	0.151739
CDH20	0.399992	2.23607	2.63606	0.151739
CEBPB	0.399992	2.23607	2.63606	0.151739
CHRNA10	0.399992	2.23607	2.63606	0.151739
CLDN7	0.399992	2.23607	2.63606	0.151739
COL13A1	0.399992	2.23607	2.63606	0.151739
CST7	0.399992	2.23607	2.63606	0.151739
CTIF	0.399992	2.23607	2.63606	0.151739
CYS1	0.399992	2.23607	2.63606	0.151739
DNAJB9	0.399992	2.23607	2.63606	0.151739
DNAJC12	0.399992	2.23607	2.63606	0.151739
DSC1	0.399992	2.23607	2.63606	0.151739
ESRRB	0.399992	2.23607	2.63606	0.151739
ETS2	0.399992	2.23607	2.63606	0.151739
F12	0.399992	2.23607	2.63606	0.151739
FAM25A	0.399992	2.23607	2.63606	0.151739
FGF18	0.399992	2.23607	2.63606	0.151739
FOLR1	0.399992	2.23607	2.63606	0.151739
FUT4	0.399992	2.23607	2.63606	0.151739
GCM1	0.399992	2.23607	2.63606	0.151739
GNG8	0.399992	2.23607	2.63606	0.151739
GPR119	0.399992	2.23607	2.63606	0.151739
GPR33	0.399992	2.23607	2.63606	0.151739
GPR88	0.399992	2.23607	2.63606	0.151739
GSC2	0.399992	2.23607	2.63606	0.151739
HIST1H1B	0.399992	2.23607	2.63606	0.151739
HIST3H2BB	0.399992	2.23607	2.63606	0.151739
HMX3	0.399992	2.23607	2.63606	0.151739
HS6ST3	0.399992	2.23607	2.63606	0.151739
HTRA4	0.399992	2.23607	2.63606	0.151739
IL16	0.399992	2.23607	2.63606	0.151739
IMPG1	0.399992	2.23607	2.63606	0.151739
INHA	0.399992	2.23607	2.63606	0.151739
IQSEC3	0.399992	2.23607	2.63606	0.151739
ITGB1BP2	0.399992	2.23607	2.63606	0.151739
ITIH4	0.399992	2.23607	2.63606	0.151739
JHY	0.399992	2.23607	2.63606	0.151739
KIF21A	0.399992	2.23607	2.63606	0.151739
KRT12	0.399992	2.23607	2.63606	0.151739
LAMB2	0.399992	2.23607	2.63606	0.151739
LIF	0.399992	2.23607	2.63606	0.151739
LOC100295797	0.399992	2.23607	2.63606	0.151739
LOC100847159	0.399992	2.23607	2.63606	0.151739
LOC100848478	0.399992	2.23607	2.63606	0.151739
LOC100848995	0.399992	2.23607	2.63606	0.151739
LOC100851938	0.399992	2.23607	2.63606	0.151739
LOC101901919	0.399992	2.23607	2.63606	0.151739
LOC101901976	0.399992	2.23607	2.63606	0.151739
LOC101902622	0.399992	2.23607	2.63606	0.151739
LOC101902851	0.399992	2.23607	2.63606	0.151739
LOC101903036	0.399992	2.23607	2.63606	0.151739
LOC101903945	0.399992	2.23607	2.63606	0.151739
LOC101904855	0.399992	2.23607	2.63606	0.151739
LOC101905390	0.399992	2.23607	2.63606	0.151739
LOC101905683	0.399992	2.23607	2.63606	0.151739
LOC101905966	0.399992	2.23607	2.63606	0.151739
LOC101906101	0.399992	2.23607	2.63606	0.151739
LOC101907315	0.399992	2.23607	2.63606	0.151739
LOC101907363	0.399992	2.23607	2.63606	0.151739
LOC101907545	0.399992	2.23607	2.63606	0.151739
LOC101907681	0.399992	2.23607	2.63606	0.151739
LOC101908098	0.399992	2.23607	2.63606	0.151739
LOC101908204	0.399992	2.23607	2.63606	0.151739
LOC104968852	0.399992	2.23607	2.63606	0.151739
LOC104968873	0.399992	2.23607	2.63606	0.151739
LOC104969525	0.399992	2.23607	2.63606	0.151739
LOC104974890	0.399992	2.23607	2.63606	0.151739
LOC104975004	0.399992	2.23607	2.63606	0.151739
LOC107131705	0.399992	2.23607	2.63606	0.151739
LOC107132284	0.399992	2.23607	2.63606	0.151739
LOC107132849	0.399992	2.23607	2.63606	0.151739
LOC107132867	0.399992	2.23607	2.63606	0.151739
LOC107133323	0.399992	2.23607	2.63606	0.151739
LOC112441470	0.399992	2.23607	2.63606	0.151739
LOC112441567	0.399992	2.23607	2.63606	0.151739
LOC112441599	0.399992	2.23607	2.63606	0.151739
LOC112441627	0.399992	2.23607	2.63606	0.151739
LOC112441882	0.399992	2.23607	2.63606	0.151739
LOC112442567	0.399992	2.23607	2.63606	0.151739
LOC112442618	0.399992	2.23607	2.63606	0.151739
LOC112442661	0.399992	2.23607	2.63606	0.151739
LOC112442751	0.399992	2.23607	2.63606	0.151739
LOC112443826	0.399992	2.23607	2.63606	0.151739
LOC112444211	0.399992	2.23607	2.63606	0.151739
LOC112444459	0.399992	2.23607	2.63606	0.151739
LOC112444841	0.399992	2.23607	2.63606	0.151739
LOC112444876	0.399992	2.23607	2.63606	0.151739
LOC112444895	0.399992	2.23607	2.63606	0.151739
LOC112446363	0.399992	2.23607	2.63606	0.151739
LOC112446415	0.399992	2.23607	2.63606	0.151739
LOC112446446	0.399992	2.23607	2.63606	0.151739
LOC112446704	0.399992	2.23607	2.63606	0.151739
LOC112446792	0.399992	2.23607	2.63606	0.151739
LOC112447105	0.399992	2.23607	2.63606	0.151739
LOC112447123	0.399992	2.23607	2.63606	0.151739
LOC112447347	0.399992	2.23607	2.63606	0.151739
LOC112447779	0.399992	2.23607	2.63606	0.151739
LOC112448079	0.399992	2.23607	2.63606	0.151739
LOC112448265	0.399992	2.23607	2.63606	0.151739
LOC112448436	0.399992	2.23607	2.63606	0.151739
LOC112448567	0.399992	2.23607	2.63606	0.151739
LOC112448738	0.399992	2.23607	2.63606	0.151739
LOC112448767	0.399992	2.23607	2.63606	0.151739
LOC112449513	0.399992	2.23607	2.63606	0.151739
LOC508666	0.399992	2.23607	2.63606	0.151739
LOC518422	0.399992	2.23607	2.63606	0.151739
LOC521656	0.399992	2.23607	2.63606	0.151739
LOC529284	0.399992	2.23607	2.63606	0.151739
LOC532174	0.399992	2.23607	2.63606	0.151739
LOC616410	0.399992	2.23607	2.63606	0.151739
LOC618733	0.399992	2.23607	2.63606	0.151739
LOC751811	0.399992	2.23607	2.63606	0.151739
LOC768255	0.399992	2.23607	2.63606	0.151739
LOC784525	0.399992	2.23607	2.63606	0.151739
LOC785149	0.399992	2.23607	2.63606	0.151739
LYZ	0.399992	2.23607	2.63606	0.151739
LYZL4	0.399992	2.23607	2.63606	0.151739
MEOX2	0.399992	2.23607	2.63606	0.151739
MINDY4B	0.399992	2.23607	2.63606	0.151739
MMP9	0.399992	2.23607	2.63606	0.151739
MYBPH	0.399992	2.23607	2.63606	0.151739
NCEH1	0.399992	2.23607	2.63606	0.151739
NEPN	0.399992	2.23607	2.63606	0.151739
NLRP12	0.399992	2.23607	2.63606	0.151739
NOTCH3	0.399992	2.23607	2.63606	0.151739
NOXO1	0.399992	2.23607	2.63606	0.151739
NUDT14	0.399992	2.23607	2.63606	0.151739
OC90	0.399992	2.23607	2.63606	0.151739
OR51E1	0.399992	2.23607	2.63606	0.151739
PABPC1L2A	0.399992	2.23607	2.63606	0.151739
PASD1	0.399992	2.23607	2.63606	0.151739
PCDH12	0.399992	2.23607	2.63606	0.151739
PDGFC	0.399992	2.23607	2.63606	0.151739
PENK	0.399992	2.23607	2.63606	0.151739
PLAC8	0.399992	2.23607	2.63606	0.151739
PLEKHA4	0.399992	2.23607	2.63606	0.151739
PLSCR5	0.399992	2.23607	2.63606	0.151739
PRELP	0.399992	2.23607	2.63606	0.151739
PTGR1	0.399992	2.23607	2.63606	0.151739
RASAL3	0.399992	2.23607	2.63606	0.151739
RCVRN	0.399992	2.23607	2.63606	0.151739
RGMA	0.399992	2.23607	2.63606	0.151739
RNF150	0.399992	2.23607	2.63606	0.151739
RNF183	0.399992	2.23607	2.63606	0.151739
SCARF2	0.399992	2.23607	2.63606	0.151739
SCG2	0.399992	2.23607	2.63606	0.151739
SECTM1A	0.399992	2.23607	2.63606	0.151739
SEL1L3	0.399992	2.23607	2.63606	0.151739
SGIP1	0.399992	2.23607	2.63606	0.151739
SH3RF2	0.399992	2.23607	2.63606	0.151739
SIRPB2	0.399992	2.23607	2.63606	0.151739
SIT1	0.399992	2.23607	2.63606	0.151739
SLC10A5	0.399992	2.23607	2.63606	0.151739
SLC25A34	0.399992	2.23607	2.63606	0.151739
SLC30A2	0.399992	2.23607	2.63606	0.151739
SLC38A5	0.399992	2.23607	2.63606	0.151739
SLC6A12	0.399992	2.23607	2.63606	0.151739
SLCO4A1	0.399992	2.23607	2.63606	0.151739
SULT1C3	0.399992	2.23607	2.63606	0.151739
SYNDIG1L	0.399992	2.23607	2.63606	0.151739
TMEM121B	0.399992	2.23607	2.63606	0.151739
TMEM200A	0.399992	2.23607	2.63606	0.151739
TMEM212	0.399992	2.23607	2.63606	0.151739
TNFRSF11B	0.399992	2.23607	2.63606	0.151739
TNMD	0.399992	2.23607	2.63606	0.151739
TRPM1	0.399992	2.23607	2.63606	0.151739
TSPAN1	0.399992	2.23607	2.63606	0.151739
UOX	0.399992	2.23607	2.63606	0.151739
ZNF233	0.399992	2.23607	2.63606	0.151739
ZNF385D	0.399992	2.23607	2.63606	0.151739
LOC101903545	0.399995	2.23607	2.63606	0.151739
LOC616190	0.399995	2.23607	2.63606	0.151739
MYH1	0.399995	2.23607	2.63606	0.151739
PANX3	0.399995	2.23607	2.63606	0.151739
SHISA9	0.399995	2.23607	2.63606	0.151739
ACTG2	0.399995	2.23607	2.63606	0.151739
CERS6	0.399995	2.23607	2.63606	0.151739
CXHXorf65	0.399995	2.23607	2.63606	0.151739
GNG11	0.399995	2.23607	2.63606	0.151739
HHIPL2	0.399995	2.23607	2.63606	0.151739
KANK4	0.399995	2.23607	2.63606	0.151739
LOC101904057	0.399995	2.23607	2.63606	0.151739
LOC101904946	0.399995	2.23607	2.63606	0.151739
LOC104973297	0.399995	2.23607	2.63606	0.151739
LOC104975830	0.399995	2.23607	2.63606	0.151739
LOC107132478	0.399995	2.23607	2.63606	0.151739
LOC112445953	0.399995	2.23607	2.63606	0.151739
LOC112448004	0.399995	2.23607	2.63606	0.151739
LOC539271	0.399995	2.23607	2.63606	0.151739
LOC786489	0.399995	2.23607	2.63606	0.151739
PTGER1	0.399995	2.23607	2.63606	0.151739
RTL4	0.399995	2.23607	2.63606	0.151739
SPTSSB	0.399995	2.23607	2.63606	0.151739
SYCE1	0.399995	2.23607	2.63606	0.151739
TMEM246	0.399995	2.23607	2.63606	0.151739
XKR5	0.399995	2.23607	2.63606	0.151739
ID4	0.399995	2.23607	2.63606	0.151739
LIMD1	0.399995	2.23607	2.63606	0.151739
LOC100849587	0.399995	2.23607	2.63606	0.151739
LOC101908221	0.399995	2.23607	2.63606	0.151739
LOC107131592	0.399995	2.23607	2.63606	0.151739
LOC112442325	0.399995	2.23607	2.63606	0.151739
LOC112449549	0.399995	2.23607	2.63606	0.151739
LVRN	0.399995	2.23607	2.63606	0.151739
NAIP	0.399995	2.23607	2.63606	0.151739
OAS1X	0.399995	2.23607	2.63606	0.151739
PLA2G2C	0.399995	2.23607	2.63606	0.151739
TYW3	0.399995	2.23607	2.63606	0.151739
CYP4F2	0.399995	2.23607	2.63606	0.151739
G6PC	0.399995	2.23607	2.63606	0.151739
KIRREL2	0.399995	2.23607	2.63606	0.151739
LOC104973568	0.399995	2.23607	2.63606	0.151739
NKX2-5	0.399995	2.23607	2.63606	0.151739
PCDH8	0.399995	2.23607	2.63606	0.151739
RSPH14	0.399995	2.23607	2.63606	0.151739
ABLIM2	0.399995	2.23607	2.63606	0.151739
ANKRD33B	0.399995	2.23607	2.63606	0.151739
AQP9	0.399995	2.23607	2.63606	0.151739
CEACAM20	0.399995	2.23607	2.63606	0.151739
CGREF1	0.399995	2.23607	2.63606	0.151739
CLEC19A	0.399995	2.23607	2.63606	0.151739
DIO1	0.399995	2.23607	2.63606	0.151739
DSB	0.399995	2.23607	2.63606	0.151739
FBXO2	0.399995	2.23607	2.63606	0.151739
FCRL3	0.399995	2.23607	2.63606	0.151739
FLT3	0.399995	2.23607	2.63606	0.151739
GPRASP1	0.399995	2.23607	2.63606	0.151739
GRID2	0.399995	2.23607	2.63606	0.151739
IGF1	0.399995	2.23607	2.63606	0.151739
KCND3	0.399995	2.23607	2.63606	0.151739
LOC100848324	0.399995	2.23607	2.63606	0.151739
LOC101904044	0.399995	2.23607	2.63606	0.151739
LOC101906756	0.399995	2.23607	2.63606	0.151739
LOC101907386	0.399995	2.23607	2.63606	0.151739
LOC104969197	0.399995	2.23607	2.63606	0.151739
LOC104969950	0.399995	2.23607	2.63606	0.151739
LOC104971464	0.399995	2.23607	2.63606	0.151739
LOC104975290	0.399995	2.23607	2.63606	0.151739
LOC107132917	0.399995	2.23607	2.63606	0.151739
LOC107133111	0.399995	2.23607	2.63606	0.151739
LOC112441866	0.399995	2.23607	2.63606	0.151739
LOC112442306	0.399995	2.23607	2.63606	0.151739
LOC112442598	0.399995	2.23607	2.63606	0.151739
LOC112443864	0.399995	2.23607	2.63606	0.151739
LOC112446048	0.399995	2.23607	2.63606	0.151739
LOC112446671	0.399995	2.23607	2.63606	0.151739
LOC112447569	0.399995	2.23607	2.63606	0.151739
LOC112449111	0.399995	2.23607	2.63606	0.151739
LOC112449364	0.399995	2.23607	2.63606	0.151739
LOC516108	0.399995	2.23607	2.63606	0.151739
LOC526230	0.399995	2.23607	2.63606	0.151739
LOC527409	0.399995	2.23607	2.63606	0.151739
LOC531038	0.399995	2.23607	2.63606	0.151739
LOC538688	0.399995	2.23607	2.63606	0.151739
LOC616860	0.399995	2.23607	2.63606	0.151739
LOC781948	0.399995	2.23607	2.63606	0.151739
MLC1	0.399995	2.23607	2.63606	0.151739
MUC19	0.399995	2.23607	2.63606	0.151739
MYOM2	0.399995	2.23607	2.63606	0.151739
NR1D2	0.399995	2.23607	2.63606	0.151739
OR52B6	0.399995	2.23607	2.63606	0.151739
PCDH18	0.399995	2.23607	2.63606	0.151739
PIGG	0.399995	2.23607	2.63606	0.151739
POU6F1	0.399995	2.23607	2.63606	0.151739
PRKCB	0.399995	2.23607	2.63606	0.151739
PTF1A	0.399995	2.23607	2.63606	0.151739
RAB38	0.399995	2.23607	2.63606	0.151739
RASSF2	0.399995	2.23607	2.63606	0.151739
RIPPLY3	0.399995	2.23607	2.63606	0.151739
SAMD9	0.399995	2.23607	2.63606	0.151739
SLC22A3	0.399995	2.23607	2.63606	0.151739
SLC5A11	0.399995	2.23607	2.63606	0.151739
SPHKAP	0.399995	2.23607	2.63606	0.151739
SPIB	0.399995	2.23607	2.63606	0.151739
TNS4	0.399995	2.23607	2.63606	0.151739
ZNF704	0.399995	2.23607	2.63606	0.151739
LOC100849037	0.399996	2.23607	2.63606	0.15174
LOC520023	0.399996	2.23607	2.63606	0.15174
ACP7	0.399996	2.23607	2.63606	0.15174
PRR32	0.399996	2.23607	2.63606	0.15174
SBSPON	0.399996	2.23607	2.63606	0.15174
BLK	0.399996	2.23607	2.63606	0.15174
BPIFC	0.399996	2.23607	2.63606	0.15174
CCDC170	0.399996	2.23607	2.63606	0.15174
CCDC8	0.399996	2.23607	2.63606	0.15174
CDC42EP5	0.399996	2.23607	2.63606	0.15174
CLDN6	0.399996	2.23607	2.63606	0.15174
CLIC5	0.399996	2.23607	2.63606	0.15174
CSF2	0.399996	2.23607	2.63606	0.15174
EOMES	0.399996	2.23607	2.63606	0.15174
FNDC4	0.399996	2.23607	2.63606	0.15174
GFAP	0.399996	2.23607	2.63606	0.15174
HEPHL1	0.399996	2.23607	2.63606	0.15174
HYAL4	0.399996	2.23607	2.63606	0.15174
IL33	0.399996	2.23607	2.63606	0.15174
LOC101906451	0.399996	2.23607	2.63606	0.15174
LOC101907931	0.399996	2.23607	2.63606	0.15174
LOC104976163	0.399996	2.23607	2.63606	0.15174
LOC112441850	0.399996	2.23607	2.63606	0.15174
LOC112442602	0.399996	2.23607	2.63606	0.15174
LOC112442719	0.399996	2.23607	2.63606	0.15174
LOC112443147	0.399996	2.23607	2.63606	0.15174
LOC112444875	0.399996	2.23607	2.63606	0.15174
LOC112449555	0.399996	2.23607	2.63606	0.15174
LOC511400	0.399996	2.23607	2.63606	0.15174
LOC518911	0.399996	2.23607	2.63606	0.15174
LOC520104	0.399996	2.23607	2.63606	0.15174
LOC615514	0.399996	2.23607	2.63606	0.15174
LOXL4	0.399996	2.23607	2.63606	0.15174
LTB4R	0.399996	2.23607	2.63606	0.15174
MATN2	0.399996	2.23607	2.63606	0.15174
MLANA	0.399996	2.23607	2.63606	0.15174
MSS51	0.399996	2.23607	2.63606	0.15174
PRSS50	0.399996	2.23607	2.63606	0.15174
SFTPA1	0.399996	2.23607	2.63606	0.15174
SLCO6A1	0.399996	2.23607	2.63606	0.15174
STPG4	0.399996	2.23607	2.63606	0.15174
TMEM130	0.399996	2.23607	2.63606	0.15174
LOC107131660	0.399996	2.23607	2.63606	0.15174
ARHGEF6	0.399997	2.23607	2.63606	0.15174
CTSK	0.399997	2.23607	2.63606	0.15174
ZDBF2	0.399997	2.23607	2.63606	0.15174
LOC104971508	0.399997	2.23607	2.63606	0.15174
ACSF2	0.399997	2.23607	2.63606	0.15174
ARNTL2	0.399997	2.23607	2.63606	0.15174
DLX1	0.399997	2.23607	2.63606	0.15174
LEPR	0.399997	2.23607	2.63606	0.15174
LOC100335642	0.399997	2.23607	2.63606	0.15174
LOC107133289	0.399997	2.23607	2.63606	0.15174
SCN7A	0.399997	2.23607	2.63606	0.15174
SLC13A4	0.399997	2.23607	2.63606	0.15174
SLC2A2	0.399997	2.23607	2.63606	0.15174
KLK10	0.399997	2.23607	2.63607	0.15174
LEP	0.399997	2.23607	2.63607	0.15174
CPA3	0.399997	2.23607	2.63607	0.15174
ENPP3	0.399998	2.23607	2.63607	0.15174
GRIK3	0.399998	2.23607	2.63607	0.15174
XIST	0.399998	2.23607	2.63607	0.151741
SIDT1	0.399998	2.23607	2.63607	0.151741
ARHGAP28	0.399998	2.23607	2.63607	0.151741
LOC112448059	0.399998	2.23607	2.63607	0.151741
ZNF831	0.399999	2.23607	2.63607	0.151741
LOC100336369	0.248407	1.37604	1.62445	0.152918
MEIOB	0.249354	1.36963	1.61899	0.154018
HES6	0.266663	1.36931	1.63597	0.163
GIMAP4	0.409539	2.09424	2.50378	0.163568
LOC104971162	0.305463	1.49071	1.79617	0.170063
CIZ1	0.199188	0.958026	1.15721	0.172127
LOC101902325	0.324795	1.50102	1.82582	0.17789
KRT72	0.297673	1.36931	1.66698	0.17857
LOC527385	0.310405	1.41421	1.72462	0.179985
WHRN	0.397468	1.80662	2.20409	0.180332
KIF2B	0.348016	1.57746	1.92548	0.180743
STT3A	0.12614	0.561413	0.687552	0.183462
LOC104973158	0.412753	1.83651	2.24927	0.183506
GADL1	0.430761	1.88562	2.31638	0.185963
SLC5A8	0.315937	1.37604	1.69198	0.186726
STK32B	0.39298	1.70159	2.09457	0.187619
LRFN1	0.33531	1.43886	1.77417	0.188996
GPSM2	0.147306	0.630049	0.777355	0.189496
PROS1	0.361652	1.5411	1.90276	0.190068
LOC101907165	0.431742	1.83086	2.2626	0.190816
LRSAM1	0.168705	0.676803	0.845509	0.199531
LOC101907562	0.526475	2.10549	2.63197	0.200031
LOC112444838	0.290229	1.1593	1.44953	0.200223
LOC112445102	0.522458	2.07556	2.59802	0.201099
TKTL2	0.503263	1.99172	2.49498	0.20171
LOC112448538	0.421843	1.66765	2.0895	0.201888
LOC112448474	0.359819	1.41421	1.77403	0.202826
CFAP206	0.469623	1.83651	2.30614	0.203641
LOC100336208	0.233194	0.911592	1.14479	0.203701
SLC18A2	0.236901	0.922428	1.15933	0.204343
LOC100336475	0.523583	2.03535	2.55894	0.20461
SPOCD1	0.364267	1.41421	1.77848	0.204819
ZDHHC19	0.399116	1.5411	1.94022	0.205707
DNER	0.456214	1.75287	2.20909	0.206517
CASQ2	0.452192	1.73205	2.18424	0.207025
MAPK15	0.394233	1.49071	1.88495	0.209148
KIF6	0.394233	1.49071	1.88495	0.209148
LOC101906567	0.394233	1.49071	1.88495	0.209148
CDH8	0.394236	1.49071	1.88495	0.20915
MROH2B	0.479983	1.80662	2.28661	0.209911
TNS1	0.479992	1.80662	2.28662	0.209914
LOC618696	0.524716	1.94047	2.46519	0.21285
IKBKE	0.533317	1.9685	2.50182	0.213172
CCDC68	0.406531	1.49071	1.89724	0.214274
CAND1	0.172232	0.628064	0.800296	0.21521
CCT6A	0.413511	1.49071	1.90422	0.217155
GTSE1	0.16969	0.610844	0.780534	0.217402
LOC515570	0.240307	0.853706	1.09401	0.219656
LOC100847410	0.388642	1.36931	1.75795	0.221077
MSH5	0.140534	0.494972	0.635505	0.221137
ELF3	0.287549	1.00779	1.29534	0.221988
CCDC137	0.192256	0.671404	0.86366	0.222606
EPHB6	0.427442	1.49071	1.91815	0.22284
MTMR14	0.176435	0.607005	0.78344	0.225206
LOC100196900	0.403296	1.38332	1.78662	0.225731
GALNTL5	0.403296	1.38332	1.78662	0.225731
SHCBP1L	0.544008	1.86263	2.40664	0.226045
SEMA3C	0.477292	1.61448	2.09177	0.228176
ENO1	0.181015	0.612173	0.793188	0.228212
AP2B1	0.175962	0.593462	0.769425	0.228693
UBC	0.172399	0.575349	0.747748	0.230558
GBX1	0.418608	1.3924	1.81101	0.231147
CYB561	0.418608	1.3924	1.81101	0.231147
SEC16B	0.187549	0.621337	0.808886	0.231861
ANXA9	0.597081	1.9685	2.56558	0.232727
POLR3C	0.150004	0.493959	0.643963	0.232939
GADD45B	0.287449	0.946524	1.23397	0.232946
LOC112448507	0.553171	1.80662	2.35979	0.234415
LOC112443767	0.553171	1.80662	2.35979	0.234415
PON1	0.553171	1.80662	2.35979	0.234415
LOC511494	0.479991	1.56492	2.04491	0.234725
LOC107131481	0.572115	1.86263	2.43474	0.23498
GALNT7	0.350054	1.13706	1.48712	0.235391
COBLL1	0.195794	0.63384	0.829634	0.236001
PCDH19	0.253802	0.82125	1.07505	0.236083
PTGER3	0.461873	1.49071	1.95259	0.236544
HSPA6	0.252555	0.810809	1.06336	0.237505
TDRD9	0.251344	0.80377	1.05511	0.238215
BRMS1	0.193745	0.618856	0.812601	0.238426
CNBP	0.203396	0.646666	0.850063	0.239272
CIST1	0.500258	1.58766	2.08792	0.239597
MFSD4B	0.186632	0.592008	0.77864	0.23969
USP28	0.163747	0.518147	0.681894	0.240136
TBX15	0.303884	0.959494	1.26338	0.240533
OXT	0.456638	1.43886	1.8955	0.240907
AMDHD1	0.210721	0.663926	0.874647	0.240921
KIAA1551	0.203919	0.640469	0.844388	0.241499
THOP1	0.215508	0.674983	0.890491	0.242011
NTS	0.454971	1.41421	1.86918	0.243406
LHFPL1	0.633757	1.9685	2.60226	0.243541
LOC509870	0.295211	0.916049	1.21126	0.243722
CASR	0.168418	0.519659	0.688077	0.244767
FSTL5	0.305975	0.942721	1.2487	0.245036
LEMD2	0.563282	1.73205	2.29533	0.245403
LOC112443025	0.563282	1.73205	2.29533	0.245403
ITGA1	0.563282	1.73205	2.29533	0.245403
LOC511106	0.563282	1.73205	2.29533	0.245403
LOC112445952	0.563282	1.73205	2.29533	0.245403
LOC101906559	0.563282	1.73205	2.29533	0.245403
LOC107132697	0.563282	1.73205	2.29533	0.245403
LOC107131296	0.563282	1.73205	2.29533	0.245403
SHISAL2A	0.563282	1.73205	2.29533	0.245403
BEX4	0.289205	0.888517	1.17772	0.245563
KIF3C	0.21627	0.664414	0.880685	0.245571
ZFAT	0.327285	1.00418	1.33147	0.245808
LOC112441509	0.252065	0.771486	1.02355	0.246265
AGT	0.533316	1.6298	2.16312	0.24655
LOC615559	0.533316	1.6298	2.16312	0.24655
CARNS1	0.533316	1.6298	2.16312	0.24655
LOC101902407	0.533316	1.6298	2.16312	0.24655
NUPR2	0.533316	1.6298	2.16312	0.24655
C15H11orf96	0.533316	1.6298	2.16312	0.24655
LOC107131810	0.533316	1.6298	2.16312	0.24655
LSP1	0.533316	1.6298	2.16312	0.24655
LDHA	0.211411	0.642798	0.854209	0.247493
SMARCAL1	0.236916	0.719812	0.956727	0.247631
TAGAP	0.621159	1.88562	2.50678	0.247792
ZSCAN16	0.621159	1.88562	2.50678	0.247792
MRPL37	0.198808	0.60326	0.802069	0.247869
BTNL2	0.608244	1.8456	2.45385	0.247874
LOC104975286	0.672149	2.02791	2.70006	0.248938
KAT7	0.11436	0.344958	0.459318	0.248978
CSF1R	0.169553	0.510966	0.680519	0.249153
ACCSL	0.141554	0.426452	0.568006	0.249212
LOC505600	0.232727	0.700816	0.933544	0.249294
CNOT6	0.152105	0.457888	0.609994	0.249356
RRAGA	0.176765	0.531378	0.708144	0.249618
EPGN	0.601311	1.80662	2.40793	0.249721
TRANK1	0.601311	1.80662	2.40793	0.249721
NPHP4	0.601311	1.80662	2.40793	0.249721
LOC512869	0.655297	1.9685	2.6238	0.249751
LOC112443216	0.227231	0.682511	0.909742	0.249775
BIRC3	0.166777	0.500626	0.667403	0.24989
POLDIP2	0.201537	0.604748	0.806285	0.249958
PRPSAP1	0.151165	0.453467	0.604631	0.250011
KCNJ15	0.474103	1.42221	1.89631	0.250013
MOG	0.635589	1.90599	2.54158	0.250076
LOC107132469	0.635589	1.90599	2.54158	0.250076
LOC528132	0.579021	1.73413	2.31315	0.250317
CFHR5	0.665313	1.99172	2.65703	0.250397
COQ6	0.240094	0.715704	0.955798	0.251197
C1H3orf58	0.54833	1.6298	2.17813	0.251743
UACA	0.223109	0.66268	0.885789	0.251876
NFE2L1	0.156517	0.464545	0.621062	0.252016
LOC101907152	0.46617	1.38332	1.84949	0.252053
HGFAC	0.461871	1.36931	1.83118	0.252226
LOC104975848	0.461871	1.36931	1.83118	0.252226
EXOC3L4	0.461871	1.36931	1.83118	0.252226
LOC104975073	0.461871	1.36931	1.83118	0.252226
APOA2	0.461871	1.36931	1.83118	0.252226
TK2	0.252953	0.74846	1.00141	0.252596
LOC101908531	0.630923	1.86263	2.49355	0.253022
LOC104975445	0.630923	1.86263	2.49355	0.253022
SMTN	0.57142	1.68508	2.2565	0.253232
NHLRC3	0.57142	1.68508	2.2565	0.253232
CCDC86	0.210135	0.619643	0.829777	0.253242
EFCAB14	0.120002	0.353622	0.473623	0.253369
SLC38A2	0.495311	1.45949	1.9548	0.253382
YWHAQ	0.182785	0.536725	0.71951	0.254041
LOC112444155	0.541415	1.58766	2.12907	0.254296
FANCI	0.176366	0.517113	0.693479	0.254321
LOC101906490	0.533808	1.56492	2.09873	0.254348
BMP2	0.533808	1.56492	2.09873	0.254348
IL2RG	0.533808	1.56492	2.09873	0.254348
LOC782061	0.533808	1.56492	2.09873	0.254348
OR2A12	0.470582	1.3787	1.84929	0.254467
BRD8	0.222401	0.650099	0.872499	0.254901
TNPO1	0.171002	0.499192	0.670194	0.255153
ZNF397	0.184199	0.536691	0.72089	0.255516
CDK6	0.486246	1.41421	1.90046	0.255857
PPP1R27	0.486246	1.41421	1.90046	0.255857
CIB4	0.486246	1.41421	1.90046	0.255857
LOC112441846	0.486246	1.41421	1.90046	0.255857
LOC509155	0.486246	1.41421	1.90046	0.255857
UNC5CL	0.486246	1.41421	1.90046	0.255857
IL18	0.486246	1.41421	1.90046	0.255857
LOC104972001	0.486246	1.41421	1.90046	0.255857
LOC112445889	0.486246	1.41421	1.90046	0.255857
TGFBR3	0.128457	0.373423	0.50188	0.255952
MROH5	0.495309	1.43886	1.93417	0.256084
LOC101903397	0.495309	1.43886	1.93417	0.256084
ZNF622	0.215275	0.624696	0.839971	0.256289
PPP1R3E	0.513775	1.49071	2.00449	0.256313
SULT2B1	0.513775	1.49071	2.00449	0.256313
TBC1D16	0.513775	1.49071	2.00449	0.256313
PHTF2	0.142678	0.413276	0.555955	0.256637
CCNI2	0.137999	0.397998	0.535998	0.257463
NELFE	0.190852	0.550403	0.741255	0.257472
AKAP4	0.585076	1.68055	2.26563	0.25824
C29H11orf86	0.486248	1.3924	1.87865	0.258829
RANBP3	0.218902	0.626565	0.845467	0.258913
DNPEP	0.230229	0.658422	0.888651	0.259077
LOC112441635	0.275937	0.787284	1.06322	0.259529
FAM124B	0.205277	0.585147	0.790425	0.259705
ARHGAP4	0.572123	1.6298	2.20192	0.259829
ZBED2	0.670029	1.90599	2.57602	0.260102
LOC524642	0.670029	1.90599	2.57602	0.260102
BLVRA	0.670029	1.90599	2.57602	0.260102
LOC790201	0.682825	1.94047	2.6233	0.260293
SDC4	0.693675	1.9685	2.66218	0.260567
DOLK	0.240157	0.680871	0.921028	0.260749
LOC784148	0.702858	1.99172	2.69458	0.260842
LOC789374	0.702858	1.99172	2.69458	0.260842
BCOR	0.164797	0.466542	0.631339	0.261027
NKX1-2	0.639982	1.80662	2.44661	0.26158
GLB1	0.639982	1.80662	2.44661	0.26158
ITGBL1	0.59264	1.67103	2.26367	0.261804
SPOUT1	0.196244	0.552058	0.748302	0.262253
NUP50	0.197095	0.553326	0.750421	0.262645
CS	0.161101	0.451995	0.613096	0.262766
CLTC	0.169942	0.476235	0.646177	0.262997
LOC509761	0.489526	1.36931	1.85883	0.263351
TBC1D15	0.276865	0.774429	1.05129	0.263356
PPM1G	0.178456	0.499166	0.677622	0.263356
CD200	0.177746	0.49716	0.674905	0.263364
WDR91	0.215189	0.600523	0.815712	0.263805
SQSTM1	0.218472	0.609112	0.827584	0.263988
[truncated: 15,356 more rows]

## Sheet: 8cell
label	Sswe	Ssbe	SS	SSwe/SS
FAM133A	0.120056	2.23607	2.35612	0.050955
CD1B5	0.188559	2.23607	2.42463	0.0777684
SEBOX	0.202666	2.23607	2.43873	0.0831031
KRT74	0.203964	2.23607	2.44003	0.0835906
MYL5	0.213805	2.23607	2.44987	0.0872718
LOC527385	0.166234	1.73604	1.90227	0.0873873
RETREG1	0.230534	2.23607	2.4666	0.093462
LOC112443149	0.236372	2.23607	2.47244	0.0956026
ATP6V1E2	0.236374	2.23607	2.47244	0.0956033
LOC101904157	0.238084	2.23607	2.47415	0.0962285
CALR3	0.259151	2.23607	2.49522	0.103859
BTNL2	0.266059	2.23607	2.50213	0.106333
DEFB4A	0.276019	2.23607	2.51209	0.109876
LOC101905990	0.276019	2.23607	2.51209	0.109876
LOC101906363	0.276019	2.23607	2.51209	0.109876
LOC104975676	0.276019	2.23607	2.51209	0.109876
LOC107131556	0.276019	2.23607	2.51209	0.109876
LOC112443423	0.276019	2.23607	2.51209	0.109876
LOC112445130	0.276019	2.23607	2.51209	0.109876
LOC783461	0.276019	2.23607	2.51209	0.109876
LOC112449355	0.28284	2.23607	2.51891	0.112287
TMPRSS11BNL	0.284623	2.23607	2.52069	0.112915
LOC112446704	0.285077	2.23607	2.52114	0.113074
TMEM156	0.291923	2.23607	2.52799	0.115476
TMEM273	0.293155	2.23607	2.52922	0.115907
LOC101907140	0.297608	2.23607	2.53368	0.117461
ECSCR	0.302366	2.23607	2.53843	0.119115
LOC104975709	0.302366	2.23607	2.53843	0.119115
LOC112443325	0.302366	2.23607	2.53843	0.119115
LOC781423	0.302366	2.23607	2.53843	0.119115
LOC112441539	0.302369	2.23607	2.53844	0.119116
TSPAN18	0.307	2.23607	2.54307	0.12072
MS4A2	0.307058	2.23607	2.54313	0.12074
DPEP2	0.309986	2.23607	2.54605	0.121751
LOC101909003	0.310653	2.23607	2.54672	0.121982
PGLYRP4	0.32071	2.23607	2.55678	0.125435
LOC101901923	0.328457	2.23607	2.56452	0.128077
P2RX7	0.33491	2.23607	2.57098	0.130266
GPR15	0.335124	2.23607	2.57119	0.130338
TSNAXIP1	0.335124	2.23607	2.57119	0.130338
JAKMIP3	0.336705	2.23607	2.57277	0.130873
GCNT7	0.339406	2.23607	2.57547	0.131784
LOC104972566	0.339406	2.23607	2.57547	0.131784
TUBB4A	0.350018	2.23607	2.58609	0.135346
AGBL1	0.352621	2.23607	2.58869	0.136216
LOC104974057	0.354248	2.23607	2.59032	0.136759
ABCG1	0.370313	2.23607	2.60638	0.142079
AGRP	0.370313	2.23607	2.60638	0.142079
APOA4	0.370313	2.23607	2.60638	0.142079
ARHGAP45	0.370313	2.23607	2.60638	0.142079
B3GNT6	0.370313	2.23607	2.60638	0.142079
CIB3	0.370313	2.23607	2.60638	0.142079
CMTM2	0.370313	2.23607	2.60638	0.142079
CYP46A1	0.370313	2.23607	2.60638	0.142079
GRK1	0.370313	2.23607	2.60638	0.142079
HES2	0.370313	2.23607	2.60638	0.142079
HIST3H2BB	0.370313	2.23607	2.60638	0.142079
HTR3B	0.370313	2.23607	2.60638	0.142079
IL36G	0.370313	2.23607	2.60638	0.142079
KL	0.370313	2.23607	2.60638	0.142079
LOC100295797	0.370313	2.23607	2.60638	0.142079
LOC101905711	0.370313	2.23607	2.60638	0.142079
LOC101906484	0.370313	2.23607	2.60638	0.142079
LOC101907006	0.370313	2.23607	2.60638	0.142079
LOC101908149	0.370313	2.23607	2.60638	0.142079
LOC104973101	0.370313	2.23607	2.60638	0.142079
LOC104975883	0.370313	2.23607	2.60638	0.142079
LOC107132046	0.370313	2.23607	2.60638	0.142079
LOC107132961	0.370313	2.23607	2.60638	0.142079
LOC112442352	0.370313	2.23607	2.60638	0.142079
LOC112442599	0.370313	2.23607	2.60638	0.142079
LOC112443469	0.370313	2.23607	2.60638	0.142079
LOC112444156	0.370313	2.23607	2.60638	0.142079
LOC112444503	0.370313	2.23607	2.60638	0.142079
LOC112445091	0.370313	2.23607	2.60638	0.142079
LOC112446662	0.370313	2.23607	2.60638	0.142079
LOC112449262	0.370313	2.23607	2.60638	0.142079
LOC112449358	0.370313	2.23607	2.60638	0.142079
LOC112449402	0.370313	2.23607	2.60638	0.142079
LOC112449565	0.370313	2.23607	2.60638	0.142079
LOC789231	0.370313	2.23607	2.60638	0.142079
PLVAP	0.370313	2.23607	2.60638	0.142079
ST8SIA4	0.370313	2.23607	2.60638	0.142079
TMEM61	0.370313	2.23607	2.60638	0.142079
ZNF648	0.370313	2.23607	2.60638	0.142079
CPLX3	0.370321	2.23607	2.60639	0.142082
FAM183A	0.370321	2.23607	2.60639	0.142082
GPR35	0.370321	2.23607	2.60639	0.142082
LOC104976279	0.370321	2.23607	2.60639	0.142082
LOC112442019	0.370321	2.23607	2.60639	0.142082
LOC112442385	0.370321	2.23607	2.60639	0.142082
LOC112446003	0.370321	2.23607	2.60639	0.142082
PIH1D3	0.370321	2.23607	2.60639	0.142082
PTH2	0.370321	2.23607	2.60639	0.142082
LOC104968671	0.370323	2.23607	2.60639	0.142083
LOC107131848	0.370323	2.23607	2.60639	0.142083
LOC112448059	0.370325	2.23607	2.60639	0.142083
LOC104976397	0.370326	2.23607	2.60639	0.142084
KIF21A	0.370326	2.23607	2.60639	0.142084
SV2B	0.370326	2.23607	2.60639	0.142084
KRT25	0.37118	2.23607	2.60725	0.142365
LOC112449085	0.37118	2.23607	2.60725	0.142365
LRIT3	0.372361	2.23607	2.60843	0.142753
AMPD1	0.37336	2.23607	2.60943	0.143081
LOC104975965	0.37336	2.23607	2.60943	0.143081
SCUBE1	0.37336	2.23607	2.60943	0.143081
TRMT9B	0.37336	2.23607	2.60943	0.143081
CALCRL	0.373362	2.23607	2.60943	0.143082
CLEC4A	0.373362	2.23607	2.60943	0.143082
ADCYAP1R1	0.375328	2.23607	2.6114	0.143727
GVQW3	0.375328	2.23607	2.6114	0.143727
KCTD4	0.375328	2.23607	2.6114	0.143727
C1QL2	0.380069	2.23607	2.61614	0.145279
CLEC14A	0.380069	2.23607	2.61614	0.145279
DUOXA2	0.380069	2.23607	2.61614	0.145279
GRXCR1	0.380069	2.23607	2.61614	0.145279
LOC101907482	0.380069	2.23607	2.61614	0.145279
LOC107131534	0.380069	2.23607	2.61614	0.145279
LOC107132196	0.380069	2.23607	2.61614	0.145279
LOC112444351	0.380069	2.23607	2.61614	0.145279
NCMAP	0.380069	2.23607	2.61614	0.145279
PACRG	0.380069	2.23607	2.61614	0.145279
SLC5A11	0.380069	2.23607	2.61614	0.145279
ADAMTS5	0.380072	2.23607	2.61614	0.14528
TEX46	0.380072	2.23607	2.61614	0.14528
CCDC80	0.380073	2.23607	2.61614	0.14528
TMEM215	0.382373	2.23607	2.61844	0.146031
LOC101906989	0.385446	2.23607	2.62151	0.147032
LTBP2	0.385446	2.23607	2.62151	0.147032
SLC30A2	0.385446	2.23607	2.62151	0.147032
FOLR3	0.388255	2.23607	2.62432	0.147945
PENK	0.388255	2.23607	2.62432	0.147945
AQP10	0.396802	2.23607	2.63287	0.150711
AQP8	0.396802	2.23607	2.63287	0.150711
ARHGAP30	0.396802	2.23607	2.63287	0.150711
ARTN	0.396802	2.23607	2.63287	0.150711
C16H1orf158	0.396802	2.23607	2.63287	0.150711
CA7	0.396802	2.23607	2.63287	0.150711
CCL5	0.396802	2.23607	2.63287	0.150711
CD163	0.396802	2.23607	2.63287	0.150711
CEBPA	0.396802	2.23607	2.63287	0.150711
CYP27C1	0.396802	2.23607	2.63287	0.150711
FXYD1	0.396802	2.23607	2.63287	0.150711
GP9	0.396802	2.23607	2.63287	0.150711
HIGD1B	0.396802	2.23607	2.63287	0.150711
HTR4	0.396802	2.23607	2.63287	0.150711
IGFBP7	0.396802	2.23607	2.63287	0.150711
KIAA1024	0.396802	2.23607	2.63287	0.150711
LOC100847148	0.396802	2.23607	2.63287	0.150711
LOC101902874	0.396802	2.23607	2.63287	0.150711
LOC101903182	0.396802	2.23607	2.63287	0.150711
LOC101903713	0.396802	2.23607	2.63287	0.150711
LOC101905162	0.396802	2.23607	2.63287	0.150711
LOC101905940	0.396802	2.23607	2.63287	0.150711
LOC101906884	0.396802	2.23607	2.63287	0.150711
LOC104971636	0.396802	2.23607	2.63287	0.150711
LOC104974269	0.396802	2.23607	2.63287	0.150711
LOC107132371	0.396802	2.23607	2.63287	0.150711
LOC112444170	0.396802	2.23607	2.63287	0.150711
LOC112446005	0.396802	2.23607	2.63287	0.150711
LOC112446024	0.396802	2.23607	2.63287	0.150711
LOC112447335	0.396802	2.23607	2.63287	0.150711
LOC112448351	0.396802	2.23607	2.63287	0.150711
LOC112448546	0.396802	2.23607	2.63287	0.150711
LOC112448834	0.396802	2.23607	2.63287	0.150711
LOC615014	0.396802	2.23607	2.63287	0.150711
LOC618256	0.396802	2.23607	2.63287	0.150711
LOC781635	0.396802	2.23607	2.63287	0.150711
LOC783472	0.396802	2.23607	2.63287	0.150711
LRIT1	0.396802	2.23607	2.63287	0.150711
NECTIN2	0.396802	2.23607	2.63287	0.150711
NTM	0.396802	2.23607	2.63287	0.150711
OTOR	0.396802	2.23607	2.63287	0.150711
PIPOX	0.396802	2.23607	2.63287	0.150711
PTPRU	0.396802	2.23607	2.63287	0.150711
SYCN	0.396802	2.23607	2.63287	0.150711
TMCO5A	0.396802	2.23607	2.63287	0.150711
WNT8B	0.396802	2.23607	2.63287	0.150711
BSP3	0.396807	2.23607	2.63288	0.150713
DAW1	0.396807	2.23607	2.63288	0.150713
LOC104975001	0.396807	2.23607	2.63288	0.150713
LOC617475	0.396807	2.23607	2.63288	0.150713
OLIG3	0.396807	2.23607	2.63288	0.150713
SBSPON	0.396807	2.23607	2.63288	0.150713
HOXC8	0.396811	2.23607	2.63288	0.150714
SPOCD1	0.396811	2.23607	2.63288	0.150714
TEX101	0.403523	2.23607	2.63959	0.152873
LOC101902851	0.405205	2.23607	2.64127	0.153413
LOC112443724	0.406843	2.23607	2.64291	0.153937
ANKRD33B	0.407918	2.23607	2.64399	0.154282
IL12RB2	0.407918	2.23607	2.64399	0.154282
ANGPTL5	0.413189	2.23607	2.64926	0.155964
LINC00694	0.413189	2.23607	2.64926	0.155964
LOC514658	0.413189	2.23607	2.64926	0.155964
LOC789612	0.413189	2.23607	2.64926	0.155964
SSPN	0.413189	2.23607	2.64926	0.155964
ARHGAP36	0.414035	2.23607	2.6501	0.156234
LOC112443031	0.418235	2.23607	2.6543	0.157569
LOC101903126	0.423045	2.23607	2.65911	0.159093
ACOD1	0.427609	2.23607	2.66368	0.160533
ADGRD2	0.427609	2.23607	2.66368	0.160533
APOBEC1	0.427609	2.23607	2.66368	0.160533
HBZ	0.427609	2.23607	2.66368	0.160533
IL17RE	0.427609	2.23607	2.66368	0.160533
KLF13	0.427609	2.23607	2.66368	0.160533
LOC107131601	0.427609	2.23607	2.66368	0.160533
LOC112441878	0.427609	2.23607	2.66368	0.160533
LOC112444617	0.427609	2.23607	2.66368	0.160533
LOC112446015	0.427609	2.23607	2.66368	0.160533
LOC112447891	0.427609	2.23607	2.66368	0.160533
LOC784522	0.427609	2.23607	2.66368	0.160533
MOSMO	0.427609	2.23607	2.66368	0.160533
MPPED2	0.427609	2.23607	2.66368	0.160533
NAT8L	0.427609	2.23607	2.66368	0.160533
OPN5	0.427609	2.23607	2.66368	0.160533
OTOA	0.427609	2.23607	2.66368	0.160533
RNF152	0.427609	2.23607	2.66368	0.160533
VTN	0.427609	2.23607	2.66368	0.160533
XCR1	0.427609	2.23607	2.66368	0.160533
PI15	0.427614	2.23607	2.66368	0.160535
SPPL2C	0.427614	2.23607	2.66368	0.160535
SSLP1	0.427614	2.23607	2.66368	0.160535
LOC104975219	0.427615	2.23607	2.66368	0.160535
C2H2orf72	0.427616	2.23607	2.66368	0.160536
LOC112447294	0.436071	2.23607	2.67214	0.163192
RNF165	0.445456	2.23607	2.68152	0.166121
COL20A1	0.450516	2.23607	2.68658	0.167691
FGF1	0.450516	2.23607	2.68658	0.167691
FOXF1	0.450516	2.23607	2.68658	0.167691
GRIK4	0.450516	2.23607	2.68658	0.167691
LOC504773	0.450516	2.23607	2.68658	0.167691
LOC505183	0.450516	2.23607	2.68658	0.167691
LOC532048	0.450516	2.23607	2.68658	0.167691
LOC536660	0.450516	2.23607	2.68658	0.167691
LRRTM4	0.450516	2.23607	2.68658	0.167691
MC1R	0.450516	2.23607	2.68658	0.167691
NHLH1	0.450516	2.23607	2.68658	0.167691
STAC3	0.450516	2.23607	2.68658	0.167691
LOC112444300	0.459553	2.23607	2.69562	0.170481
PPP1R16B	0.459553	2.23607	2.69562	0.170481
CDNF	0.46734	2.23607	2.70341	0.172871
KCNG4	0.46734	2.23607	2.70341	0.172871
LOC112443134	0.46734	2.23607	2.70341	0.172871
LOC112449298	0.46734	2.23607	2.70341	0.172871
RAD9B	0.46734	2.23607	2.70341	0.172871
SNCG	0.46734	2.23607	2.70341	0.172871
MGC139164	0.467343	2.23607	2.70341	0.172872
UBC	0.249949	1.17567	1.42562	0.175327
SLC8A3	0.340303	1.59482	1.93513	0.175856
LOC100847120	0.480033	2.23607	2.7161	0.176736
MPP3	0.480033	2.23607	2.7161	0.176736
SLC5A8	0.480033	2.23607	2.7161	0.176736
LOC112448825	0.480036	2.23607	2.7161	0.176737
ITGB8	0.48526	2.23607	2.72133	0.178317
IL16	0.489893	2.23607	2.72596	0.179714
LOC112444505	0.489893	2.23607	2.72596	0.179714
PLA2R1	0.489893	2.23607	2.72596	0.179714
ELSPBP1	0.466553	2.10549	2.57205	0.181394
CAND1	0.225654	1.01788	1.24353	0.181463
BHLHE40	0.497751	2.23607	2.73382	0.182072
LOC101907250	0.497751	2.23607	2.73382	0.182072
45353	0.497751	2.23607	2.73382	0.182072
NKAIN3	0.497751	2.23607	2.73382	0.182072
SERTM2	0.497751	2.23607	2.73382	0.182072
HIVEP2	0.497753	2.23607	2.73382	0.182072
LOC505918	0.497753	2.23607	2.73382	0.182072
KCNAB2	0.50415	2.23607	2.74022	0.183982
SYCE1	0.404987	1.78754	2.19253	0.184712
HSBP1L1	0.506925	2.23607	2.74299	0.184807
LOC112446721	0.509458	2.23607	2.74553	0.185559
MTHFD1	0.184414	0.803658	0.988072	0.18664
LOC112444840	0.517746	2.23607	2.75381	0.188011
LOC112448747	0.517746	2.23607	2.75381	0.188011
SOX7	0.517746	2.23607	2.75381	0.188011
TSHB	0.521041	2.23607	2.75711	0.188981
CETN3	0.247661	1.06082	1.30848	0.189274
DSB	0.523914	2.23607	2.75998	0.189825
C25H16orf82	0.532052	2.23607	2.76812	0.192207
LOC101904714	0.534093	2.23607	2.77016	0.192802
LHFPL1	0.539251	2.23607	2.77532	0.194302
PCNA	0.262345	1.06563	1.32797	0.197553
ACKR3	0.56564	2.23607	2.80171	0.201891
ACRBP	0.56564	2.23607	2.80171	0.201891
ADAM21	0.56564	2.23607	2.80171	0.201891
ADAMTS1	0.56564	2.23607	2.80171	0.201891
ADAMTS10	0.56564	2.23607	2.80171	0.201891
ADAMTS13	0.56564	2.23607	2.80171	0.201891
ADCY4	0.56564	2.23607	2.80171	0.201891
ADGB	0.56564	2.23607	2.80171	0.201891
ADGRA1	0.56564	2.23607	2.80171	0.201891
ADH7	0.56564	2.23607	2.80171	0.201891
ADRA1B	0.56564	2.23607	2.80171	0.201891
AEBP1	0.56564	2.23607	2.80171	0.201891
AGR2	0.56564	2.23607	2.80171	0.201891
AHNAK2	0.56564	2.23607	2.80171	0.201891
AICDA	0.56564	2.23607	2.80171	0.201891
AIF1L	0.56564	2.23607	2.80171	0.201891
ALKAL2	0.56564	2.23607	2.80171	0.201891
ALX4	0.56564	2.23607	2.80171	0.201891
AMBP	0.56564	2.23607	2.80171	0.201891
ANG	0.56564	2.23607	2.80171	0.201891
ANGPT4	0.56564	2.23607	2.80171	0.201891
ANKRD24	0.56564	2.23607	2.80171	0.201891
ANKRD65	0.56564	2.23607	2.80171	0.201891
APOC3	0.56564	2.23607	2.80171	0.201891
ARSE	0.56564	2.23607	2.80171	0.201891
ASB10	0.56564	2.23607	2.80171	0.201891
B4GALNT2	0.56564	2.23607	2.80171	0.201891
BCAM	0.56564	2.23607	2.80171	0.201891
BCHE	0.56564	2.23607	2.80171	0.201891
BCO1	0.56564	2.23607	2.80171	0.201891
BDKRB2	0.56564	2.23607	2.80171	0.201891
BGLAP	0.56564	2.23607	2.80171	0.201891
BIK	0.56564	2.23607	2.80171	0.201891
BMX	0.56564	2.23607	2.80171	0.201891
BOLA-DQA5	0.56564	2.23607	2.80171	0.201891
BOSTAUV1R404	0.56564	2.23607	2.80171	0.201891
BOSTAUV1R426	0.56564	2.23607	2.80171	0.201891
BTBD17	0.56564	2.23607	2.80171	0.201891
BoLA	0.56564	2.23607	2.80171	0.201891
C11H2orf73	0.56564	2.23607	2.80171	0.201891
C12H13orf42	0.56564	2.23607	2.80171	0.201891
C13H10orf113	0.56564	2.23607	2.80171	0.201891
C13H10orf67	0.56564	2.23607	2.80171	0.201891
C15H11orf94	0.56564	2.23607	2.80171	0.201891
C1QL1	0.56564	2.23607	2.80171	0.201891
C1QTNF1	0.56564	2.23607	2.80171	0.201891
C1QTNF6	0.56564	2.23607	2.80171	0.201891
C2	0.56564	2.23607	2.80171	0.201891
C23H6orf47	0.56564	2.23607	2.80171	0.201891
C25H16orf54	0.56564	2.23607	2.80171	0.201891
C2CD4B	0.56564	2.23607	2.80171	0.201891
C2CD4D	0.56564	2.23607	2.80171	0.201891
C3	0.56564	2.23607	2.80171	0.201891
C3H1orf94	0.56564	2.23607	2.80171	0.201891
C7H5orf46	0.56564	2.23607	2.80171	0.201891
CA14	0.56564	2.23607	2.80171	0.201891
CAMK2N2	0.56564	2.23607	2.80171	0.201891
CARTPT	0.56564	2.23607	2.80171	0.201891
CAVIN2	0.56564	2.23607	2.80171	0.201891
CCDC182	0.56564	2.23607	2.80171	0.201891
CCDC194	0.56564	2.23607	2.80171	0.201891
CCDC70	0.56564	2.23607	2.80171	0.201891
CDH12	0.56564	2.23607	2.80171	0.201891
CEACAM16	0.56564	2.23607	2.80171	0.201891
CES2	0.56564	2.23607	2.80171	0.201891
CH25H	0.56564	2.23607	2.80171	0.201891
CHIA	0.56564	2.23607	2.80171	0.201891
CLDN5	0.56564	2.23607	2.80171	0.201891
CNTNAP5	0.56564	2.23607	2.80171	0.201891
COL18A1	0.56564	2.23607	2.80171	0.201891
COL7A1	0.56564	2.23607	2.80171	0.201891
CRIP3	0.56564	2.23607	2.80171	0.201891
CROCC2	0.56564	2.23607	2.80171	0.201891
CRYGN	0.56564	2.23607	2.80171	0.201891
CSRP3	0.56564	2.23607	2.80171	0.201891
CST11	0.56564	2.23607	2.80171	0.201891
CTSH	0.56564	2.23607	2.80171	0.201891
CWH43	0.56564	2.23607	2.80171	0.201891
CXHXorf21	0.56564	2.23607	2.80171	0.201891
CYLC1	0.56564	2.23607	2.80171	0.201891
CYP11A1	0.56564	2.23607	2.80171	0.201891
CYP4B1	0.56564	2.23607	2.80171	0.201891
DCSTAMP	0.56564	2.23607	2.80171	0.201891
DEFB	0.56564	2.23607	2.80171	0.201891
DEFB125	0.56564	2.23607	2.80171	0.201891
DGAT2L6	0.56564	2.23607	2.80171	0.201891
DNHD1	0.56564	2.23607	2.80171	0.201891
DSG4	0.56564	2.23607	2.80171	0.201891
EFCAB9	0.56564	2.23607	2.80171	0.201891
EFNB3	0.56564	2.23607	2.80171	0.201891
EGFL7	0.56564	2.23607	2.80171	0.201891
ELAC1	0.56564	2.23607	2.80171	0.201891
ELFN2	0.56564	2.23607	2.80171	0.201891
ENTPD2	0.56564	2.23607	2.80171	0.201891
EPHA5	0.56564	2.23607	2.80171	0.201891
EPHA8	0.56564	2.23607	2.80171	0.201891
EPHX2	0.56564	2.23607	2.80171	0.201891
EPN3	0.56564	2.23607	2.80171	0.201891
ERICH4	0.56564	2.23607	2.80171	0.201891
FAM131B	0.56564	2.23607	2.80171	0.201891
FAM166A	0.56564	2.23607	2.80171	0.201891
FAM216B	0.56564	2.23607	2.80171	0.201891
FAM228A	0.56564	2.23607	2.80171	0.201891
FAM229A	0.56564	2.23607	2.80171	0.201891
FAM240A	0.56564	2.23607	2.80171	0.201891
FAM25A	0.56564	2.23607	2.80171	0.201891
FAM69B	0.56564	2.23607	2.80171	0.201891
FANCD2OS	0.56564	2.23607	2.80171	0.201891
FCRLB	0.56564	2.23607	2.80171	0.201891
FIGNL2	0.56564	2.23607	2.80171	0.201891
FOXA2	0.56564	2.23607	2.80171	0.201891
FOXB1	0.56564	2.23607	2.80171	0.201891
FRMPD2	0.56564	2.23607	2.80171	0.201891
G6PC2	0.56564	2.23607	2.80171	0.201891
GAD2	0.56564	2.23607	2.80171	0.201891
GC	0.56564	2.23607	2.80171	0.201891
GDF15	0.56564	2.23607	2.80171	0.201891
GFRAL	0.56564	2.23607	2.80171	0.201891
GHRH	0.56564	2.23607	2.80171	0.201891
GLRA2	0.56564	2.23607	2.80171	0.201891
GMFG	0.56564	2.23607	2.80171	0.201891
GP1BA	0.56564	2.23607	2.80171	0.201891
GPBAR1	0.56564	2.23607	2.80171	0.201891
GPIHBP1	0.56564	2.23607	2.80171	0.201891
GPR162	0.56564	2.23607	2.80171	0.201891
GPT	0.56564	2.23607	2.80171	0.201891
GRIFIN	0.56564	2.23607	2.80171	0.201891
GSC	0.56564	2.23607	2.80171	0.201891
GSTT1	0.56564	2.23607	2.80171	0.201891
GSX2	0.56564	2.23607	2.80171	0.201891
HAVCR1	0.56564	2.23607	2.80171	0.201891
HBB	0.56564	2.23607	2.80171	0.201891
HIST1H2BI	0.56564	2.23607	2.80171	0.201891
HIST1H3C	0.56564	2.23607	2.80171	0.201891
HIST2H3D	0.56564	2.23607	2.80171	0.201891
HMGA2	0.56564	2.23607	2.80171	0.201891
HOXD10	0.56564	2.23607	2.80171	0.201891
HR	0.56564	2.23607	2.80171	0.201891
HYI	0.56564	2.23607	2.80171	0.201891
IAPP	0.56564	2.23607	2.80171	0.201891
IFITM3	0.56564	2.23607	2.80171	0.201891
IFN-TAU	0.56564	2.23607	2.80171	0.201891
IFN-tau-c1	0.56564	2.23607	2.80171	0.201891
IFNA16	0.56564	2.23607	2.80171	0.201891
IFNAG	0.56564	2.23607	2.80171	0.201891
IFNL3	0.56564	2.23607	2.80171	0.201891
IFNW1	0.56564	2.23607	2.80171	0.201891
IGDCC4	0.56564	2.23607	2.80171	0.201891
IGFBP6	0.56564	2.23607	2.80171	0.201891
IGFN1	0.56564	2.23607	2.80171	0.201891
IGSF22	0.56564	2.23607	2.80171	0.201891
IGSF6	0.56564	2.23607	2.80171	0.201891
IL25	0.56564	2.23607	2.80171	0.201891
IMPG1	0.56564	2.23607	2.80171	0.201891
INHBE	0.56564	2.23607	2.80171	0.201891
IQCF1	0.56564	2.23607	2.80171	0.201891
IQSEC3	0.56564	2.23607	2.80171	0.201891
IRX1	0.56564	2.23607	2.80171	0.201891
ISG15	0.56564	2.23607	2.80171	0.201891
ISG20	0.56564	2.23607	2.80171	0.201891
ITIH4	0.56564	2.23607	2.80171	0.201891
JPH2	0.56564	2.23607	2.80171	0.201891
KBTBD12	0.56564	2.23607	2.80171	0.201891
KCNJ12	0.56564	2.23607	2.80171	0.201891
KCNJ4	0.56564	2.23607	2.80171	0.201891
KCNK9	0.56564	2.23607	2.80171	0.201891
KCNMB3	0.56564	2.23607	2.80171	0.201891
KCNU1	0.56564	2.23607	2.80171	0.201891
KIAA1257	0.56564	2.23607	2.80171	0.201891
KIF26A	0.56564	2.23607	2.80171	0.201891
KISS1R	0.56564	2.23607	2.80171	0.201891
KLHL17	0.56564	2.23607	2.80171	0.201891
KLHL38	0.56564	2.23607	2.80171	0.201891
KLK7	0.56564	2.23607	2.80171	0.201891
KRT18	0.56564	2.23607	2.80171	0.201891
LGI3	0.56564	2.23607	2.80171	0.201891
LGR5	0.56564	2.23607	2.80171	0.201891
LGR6	0.56564	2.23607	2.80171	0.201891
LIF	0.56564	2.23607	2.80171	0.201891
LIME1	0.56564	2.23607	2.80171	0.201891
LIPG	0.56564	2.23607	2.80171	0.201891
LOC100138004	0.56564	2.23607	2.80171	0.201891
LOC100138853	0.56564	2.23607	2.80171	0.201891
LOC100139061	0.56564	2.23607	2.80171	0.201891
LOC100139679	0.56564	2.23607	2.80171	0.201891
LOC100140029	0.56564	2.23607	2.80171	0.201891
LOC100296670	0.56564	2.23607	2.80171	0.201891
LOC100296778	0.56564	2.23607	2.80171	0.201891
LOC100297056	0.56564	2.23607	2.80171	0.201891
LOC100298118	0.56564	2.23607	2.80171	0.201891
LOC100298625	0.56564	2.23607	2.80171	0.201891
LOC100298658	0.56564	2.23607	2.80171	0.201891
LOC100299995	0.56564	2.23607	2.80171	0.201891
LOC100300442	0.56564	2.23607	2.80171	0.201891
LOC100335879	0.56564	2.23607	2.80171	0.201891
LOC100336669	0.56564	2.23607	2.80171	0.201891
LOC100336909	0.56564	2.23607	2.80171	0.201891
LOC100336921	0.56564	2.23607	2.80171	0.201891
LOC100337108	0.56564	2.23607	2.80171	0.201891
LOC100847122	0.56564	2.23607	2.80171	0.201891
LOC100847256	0.56564	2.23607	2.80171	0.201891
LOC100847335	0.56564	2.23607	2.80171	0.201891
LOC100847453	0.56564	2.23607	2.80171	0.201891
LOC100847719	0.56564	2.23607	2.80171	0.201891
LOC100847761	0.56564	2.23607	2.80171	0.201891
LOC100847819	0.56564	2.23607	2.80171	0.201891
LOC100847981	0.56564	2.23607	2.80171	0.201891
LOC100848030	0.56564	2.23607	2.80171	0.201891
LOC100848052	0.56564	2.23607	2.80171	0.201891
LOC100848076	0.56564	2.23607	2.80171	0.201891
LOC100848105	0.56564	2.23607	2.80171	0.201891
LOC100848177	0.56564	2.23607	2.80171	0.201891
LOC100848180	0.56564	2.23607	2.80171	0.201891
LOC100848604	0.56564	2.23607	2.80171	0.201891
LOC100848921	0.56564	2.23607	2.80171	0.201891
LOC100848939	0.56564	2.23607	2.80171	0.201891
LOC101901976	0.56564	2.23607	2.80171	0.201891
LOC101901998	0.56564	2.23607	2.80171	0.201891
LOC101902038	0.56564	2.23607	2.80171	0.201891
LOC101902048	0.56564	2.23607	2.80171	0.201891
LOC101902055	0.56564	2.23607	2.80171	0.201891
LOC101902174	0.56564	2.23607	2.80171	0.201891
LOC101902321	0.56564	2.23607	2.80171	0.201891
LOC101902449	0.56564	2.23607	2.80171	0.201891
LOC101902490	0.56564	2.23607	2.80171	0.201891
LOC101902663	0.56564	2.23607	2.80171	0.201891
LOC101902689	0.56564	2.23607	2.80171	0.201891
LOC101902742	0.56564	2.23607	2.80171	0.201891
LOC101902861	0.56564	2.23607	2.80171	0.201891
LOC101902920	0.56564	2.23607	2.80171	0.201891
LOC101903067	0.56564	2.23607	2.80171	0.201891
LOC101903087	0.56564	2.23607	2.80171	0.201891
LOC101903208	0.56564	2.23607	2.80171	0.201891
LOC101903290	0.56564	2.23607	2.80171	0.201891
LOC101903383	0.56564	2.23607	2.80171	0.201891
LOC101903506	0.56564	2.23607	2.80171	0.201891
LOC101903509	0.56564	2.23607	2.80171	0.201891
LOC101903574	0.56564	2.23607	2.80171	0.201891
LOC101903632	0.56564	2.23607	2.80171	0.201891
LOC101903757	0.56564	2.23607	2.80171	0.201891
LOC101903773	0.56564	2.23607	2.80171	0.201891
LOC101903793	0.56564	2.23607	2.80171	0.201891
LOC101903832	0.56564	2.23607	2.80171	0.201891
LOC101903969	0.56564	2.23607	2.80171	0.201891
LOC101904239	0.56564	2.23607	2.80171	0.201891
LOC101904405	0.56564	2.23607	2.80171	0.201891
LOC101904500	0.56564	2.23607	2.80171	0.201891
LOC101904537	0.56564	2.23607	2.80171	0.201891
LOC101904673	0.56564	2.23607	2.80171	0.201891
LOC101904705	0.56564	2.23607	2.80171	0.201891
LOC101905170	0.56564	2.23607	2.80171	0.201891
LOC101905194	0.56564	2.23607	2.80171	0.201891
LOC101905309	0.56564	2.23607	2.80171	0.201891
LOC101905484	0.56564	2.23607	2.80171	0.201891
LOC101905778	0.56564	2.23607	2.80171	0.201891
LOC101905925	0.56564	2.23607	2.80171	0.201891
LOC101905966	0.56564	2.23607	2.80171	0.201891
LOC101906153	0.56564	2.23607	2.80171	0.201891
LOC101906279	0.56564	2.23607	2.80171	0.201891
LOC101906339	0.56564	2.23607	2.80171	0.201891
LOC101906488	0.56564	2.23607	2.80171	0.201891
LOC101906705	0.56564	2.23607	2.80171	0.201891
LOC101906739	0.56564	2.23607	2.80171	0.201891
LOC101906914	0.56564	2.23607	2.80171	0.201891
LOC101907107	0.56564	2.23607	2.80171	0.201891
LOC101907127	0.56564	2.23607	2.80171	0.201891
LOC101907174	0.56564	2.23607	2.80171	0.201891
LOC101907276	0.56564	2.23607	2.80171	0.201891
LOC101907363	0.56564	2.23607	2.80171	0.201891
LOC101907404	0.56564	2.23607	2.80171	0.201891
LOC101907405	0.56564	2.23607	2.80171	0.201891
LOC101907491	0.56564	2.23607	2.80171	0.201891
LOC101907588	0.56564	2.23607	2.80171	0.201891
LOC101907799	0.56564	2.23607	2.80171	0.201891
LOC101907857	0.56564	2.23607	2.80171	0.201891
LOC101908069	0.56564	2.23607	2.80171	0.201891
LOC101908237	0.56564	2.23607	2.80171	0.201891
LOC101909685	0.56564	2.23607	2.80171	0.201891
LOC104968479	0.56564	2.23607	2.80171	0.201891
LOC104968563	0.56564	2.23607	2.80171	0.201891
LOC104968576	0.56564	2.23607	2.80171	0.201891
LOC104968931	0.56564	2.23607	2.80171	0.201891
LOC104968940	0.56564	2.23607	2.80171	0.201891
LOC104968990	0.56564	2.23607	2.80171	0.201891
LOC104969022	0.56564	2.23607	2.80171	0.201891
LOC104969140	0.56564	2.23607	2.80171	0.201891
LOC104969190	0.56564	2.23607	2.80171	0.201891
LOC104969199	0.56564	2.23607	2.80171	0.201891
LOC104969435	0.56564	2.23607	2.80171	0.201891
LOC104969525	0.56564	2.23607	2.80171	0.201891
LOC104969596	0.56564	2.23607	2.80171	0.201891
LOC104969640	0.56564	2.23607	2.80171	0.201891
LOC104969823	0.56564	2.23607	2.80171	0.201891
LOC104970116	0.56564	2.23607	2.80171	0.201891
LOC104970383	0.56564	2.23607	2.80171	0.201891
LOC104970566	0.56564	2.23607	2.80171	0.201891
LOC104970610	0.56564	2.23607	2.80171	0.201891
LOC104970752	0.56564	2.23607	2.80171	0.201891
LOC104970906	0.56564	2.23607	2.80171	0.201891
LOC104970908	0.56564	2.23607	2.80171	0.201891
LOC104970949	0.56564	2.23607	2.80171	0.201891
LOC104971009	0.56564	2.23607	2.80171	0.201891
LOC104971070	0.56564	2.23607	2.80171	0.201891
LOC104971255	0.56564	2.23607	2.80171	0.201891
LOC104971316	0.56564	2.23607	2.80171	0.201891
LOC104971676	0.56564	2.23607	2.80171	0.201891
LOC104971707	0.56564	2.23607	2.80171	0.201891
LOC104971924	0.56564	2.23607	2.80171	0.201891
LOC104972024	0.56564	2.23607	2.80171	0.201891
LOC104972390	0.56564	2.23607	2.80171	0.201891
LOC104972501	0.56564	2.23607	2.80171	0.201891
LOC104972574	0.56564	2.23607	2.80171	0.201891
LOC104972593	0.56564	2.23607	2.80171	0.201891
LOC104972595	0.56564	2.23607	2.80171	0.201891
LOC104972617	0.56564	2.23607	2.80171	0.201891
LOC104972733	0.56564	2.23607	2.80171	0.201891
LOC104973098	0.56564	2.23607	2.80171	0.201891
LOC104973233	0.56564	2.23607	2.80171	0.201891
LOC104973250	0.56564	2.23607	2.80171	0.201891
LOC104973374	0.56564	2.23607	2.80171	0.201891
LOC104973390	0.56564	2.23607	2.80171	0.201891
LOC104973514	0.56564	2.23607	2.80171	0.201891
LOC104973714	0.56564	2.23607	2.80171	0.201891
LOC104973829	0.56564	2.23607	2.80171	0.201891
LOC104973989	0.56564	2.23607	2.80171	0.201891
LOC104974137	0.56564	2.23607	2.80171	0.201891
LOC104974160	0.56564	2.23607	2.80171	0.201891
LOC104974222	0.56564	2.23607	2.80171	0.201891
LOC104974348	0.56564	2.23607	2.80171	0.201891
LOC104974444	0.56564	2.23607	2.80171	0.201891
LOC104974468	0.56564	2.23607	2.80171	0.201891
LOC104974945	0.56564	2.23607	2.80171	0.201891
LOC104975198	0.56564	2.23607	2.80171	0.201891
LOC104975277	0.56564	2.23607	2.80171	0.201891
LOC104975283	0.56564	2.23607	2.80171	0.201891
LOC104975474	0.56564	2.23607	2.80171	0.201891
LOC104975475	0.56564	2.23607	2.80171	0.201891
LOC104975960	0.56564	2.23607	2.80171	0.201891
LOC104975972	0.56564	2.23607	2.80171	0.201891
LOC104976078	0.56564	2.23607	2.80171	0.201891
LOC104976250	0.56564	2.23607	2.80171	0.201891
LOC107131338	0.56564	2.23607	2.80171	0.201891
LOC107131385	0.56564	2.23607	2.80171	0.201891
LOC107131403	0.56564	2.23607	2.80171	0.201891
LOC107131441	0.56564	2.23607	2.80171	0.201891
LOC107131548	0.56564	2.23607	2.80171	0.201891
LOC107131570	0.56564	2.23607	2.80171	0.201891
LOC107131590	0.56564	2.23607	2.80171	0.201891
LOC107131597	0.56564	2.23607	2.80171	0.201891
LOC107131642	0.56564	2.23607	2.80171	0.201891
LOC107131643	0.56564	2.23607	2.80171	0.201891
LOC107131647	0.56564	2.23607	2.80171	0.201891
LOC107131779	0.56564	2.23607	2.80171	0.201891
LOC107131843	0.56564	2.23607	2.80171	0.201891
LOC107131846	0.56564	2.23607	2.80171	0.201891
LOC107131851	0.56564	2.23607	2.80171	0.201891
LOC107131885	0.56564	2.23607	2.80171	0.201891
LOC107131898	0.56564	2.23607	2.80171	0.201891
LOC107131919	0.56564	2.23607	2.80171	0.201891
LOC107131968	0.56564	2.23607	2.80171	0.201891
LOC107132092	0.56564	2.23607	2.80171	0.201891
LOC107132174	0.56564	2.23607	2.80171	0.201891
LOC107132241	0.56564	2.23607	2.80171	0.201891
LOC107132265	0.56564	2.23607	2.80171	0.201891
LOC107132286	0.56564	2.23607	2.80171	0.201891
LOC107132298	0.56564	2.23607	2.80171	0.201891
LOC107132300	0.56564	2.23607	2.80171	0.201891
LOC107132328	0.56564	2.23607	2.80171	0.201891
LOC107132398	0.56564	2.23607	2.80171	0.201891
LOC107132524	0.56564	2.23607	2.80171	0.201891
LOC107132587	0.56564	2.23607	2.80171	0.201891
LOC107132589	0.56564	2.23607	2.80171	0.201891
LOC107132686	0.56564	2.23607	2.80171	0.201891
LOC107132803	0.56564	2.23607	2.80171	0.201891
LOC107132901	0.56564	2.23607	2.80171	0.201891
LOC107132979	0.56564	2.23607	2.80171	0.201891
LOC107133125	0.56564	2.23607	2.80171	0.201891
LOC107133133	0.56564	2.23607	2.80171	0.201891
LOC107133208	0.56564	2.23607	2.80171	0.201891
LOC107133214	0.56564	2.23607	2.80171	0.201891
LOC107133264	0.56564	2.23607	2.80171	0.201891
LOC107133301	0.56564	2.23607	2.80171	0.201891
LOC107133315	0.56564	2.23607	2.80171	0.201891
LOC112441469	0.56564	2.23607	2.80171	0.201891
LOC112441483	0.56564	2.23607	2.80171	0.201891
LOC112441542	0.56564	2.23607	2.80171	0.201891
LOC112441554	0.56564	2.23607	2.80171	0.201891
LOC112441575	0.56564	2.23607	2.80171	0.201891
LOC112441620	0.56564	2.23607	2.80171	0.201891
LOC112441642	0.56564	2.23607	2.80171	0.201891
LOC112441650	0.56564	2.23607	2.80171	0.201891
LOC112441651	0.56564	2.23607	2.80171	0.201891
LOC112441664	0.56564	2.23607	2.80171	0.201891
LOC112441665	0.56564	2.23607	2.80171	0.201891
LOC112441777	0.56564	2.23607	2.80171	0.201891
LOC112441792	0.56564	2.23607	2.80171	0.201891
LOC112441811	0.56564	2.23607	2.80171	0.201891
LOC112441818	0.56564	2.23607	2.80171	0.201891
LOC112441838	0.56564	2.23607	2.80171	0.201891
LOC112442004	0.56564	2.23607	2.80171	0.201891
LOC112442010	0.56564	2.23607	2.80171	0.201891
LOC112442022	0.56564	2.23607	2.80171	0.201891
LOC112442032	0.56564	2.23607	2.80171	0.201891
LOC112442042	0.56564	2.23607	2.80171	0.201891
LOC112442190	0.56564	2.23607	2.80171	0.201891
LOC112442248	0.56564	2.23607	2.80171	0.201891
LOC112442265	0.56564	2.23607	2.80171	0.201891
LOC112442275	0.56564	2.23607	2.80171	0.201891
LOC112442295	0.56564	2.23607	2.80171	0.201891
LOC112442317	0.56564	2.23607	2.80171	0.201891
LOC112442329	0.56564	2.23607	2.80171	0.201891
LOC112442345	0.56564	2.23607	2.80171	0.201891
LOC112442350	0.56564	2.23607	2.80171	0.201891
LOC112442404	0.56564	2.23607	2.80171	0.201891
LOC112442451	0.56564	2.23607	2.80171	0.201891
LOC112442554	0.56564	2.23607	2.80171	0.201891
LOC112442596	0.56564	2.23607	2.80171	0.201891
LOC112442600	0.56564	2.23607	2.80171	0.201891
LOC112442608	0.56564	2.23607	2.80171	0.201891
LOC112442627	0.56564	2.23607	2.80171	0.201891
LOC112442639	0.56564	2.23607	2.80171	0.201891
LOC112442641	0.56564	2.23607	2.80171	0.201891
LOC112442662	0.56564	2.23607	2.80171	0.201891
LOC112442668	0.56564	2.23607	2.80171	0.201891
LOC112442680	0.56564	2.23607	2.80171	0.201891
LOC112442682	0.56564	2.23607	2.80171	0.201891
LOC112442698	0.56564	2.23607	2.80171	0.201891
LOC112442705	0.56564	2.23607	2.80171	0.201891
LOC112442718	0.56564	2.23607	2.80171	0.201891
LOC112442740	0.56564	2.23607	2.80171	0.201891
LOC112443146	0.56564	2.23607	2.80171	0.201891
LOC112443151	0.56564	2.23607	2.80171	0.201891
LOC112443153	0.56564	2.23607	2.80171	0.201891
LOC112443176	0.56564	2.23607	2.80171	0.201891
LOC112443198	0.56564	2.23607	2.80171	0.201891
LOC112443211	0.56564	2.23607	2.80171	0.201891
LOC112443229	0.56564	2.23607	2.80171	0.201891
LOC112443241	0.56564	2.23607	2.80171	0.201891
LOC112443242	0.56564	2.23607	2.80171	0.201891
LOC112443430	0.56564	2.23607	2.80171	0.201891
LOC112443471	0.56564	2.23607	2.80171	0.201891
LOC112443473	0.56564	2.23607	2.80171	0.201891
LOC112443493	0.56564	2.23607	2.80171	0.201891
LOC112443494	0.56564	2.23607	2.80171	0.201891
LOC112443704	0.56564	2.23607	2.80171	0.201891
LOC112443766	0.56564	2.23607	2.80171	0.201891
LOC112443768	0.56564	2.23607	2.80171	0.201891
LOC112443770	0.56564	2.23607	2.80171	0.201891
LOC112443801	0.56564	2.23607	2.80171	0.201891
LOC112443819	0.56564	2.23607	2.80171	0.201891
LOC112444160	0.56564	2.23607	2.80171	0.201891
LOC112444161	0.56564	2.23607	2.80171	0.201891
LOC112444182	0.56564	2.23607	2.80171	0.201891
LOC112444183	0.56564	2.23607	2.80171	0.201891
LOC112444281	0.56564	2.23607	2.80171	0.201891
LOC112444301	0.56564	2.23607	2.80171	0.201891
LOC112444461	0.56564	2.23607	2.80171	0.201891
LOC112444494	0.56564	2.23607	2.80171	0.201891
LOC112444523	0.56564	2.23607	2.80171	0.201891
LOC112444535	0.56564	2.23607	2.80171	0.201891
LOC112444603	0.56564	2.23607	2.80171	0.201891
LOC112444631	0.56564	2.23607	2.80171	0.201891
LOC112444632	0.56564	2.23607	2.80171	0.201891
LOC112444743	0.56564	2.23607	2.80171	0.201891
LOC112444749	0.56564	2.23607	2.80171	0.201891
LOC112444753	0.56564	2.23607	2.80171	0.201891
LOC112444772	0.56564	2.23607	2.80171	0.201891
LOC112444774	0.56564	2.23607	2.80171	0.201891
LOC112444871	0.56564	2.23607	2.80171	0.201891
LOC112444889	0.56564	2.23607	2.80171	0.201891
LOC112444919	0.56564	2.23607	2.80171	0.201891
LOC112445003	0.56564	2.23607	2.80171	0.201891
LOC112445087	0.56564	2.23607	2.80171	0.201891
LOC112445112	0.56564	2.23607	2.80171	0.201891
LOC112445120	0.56564	2.23607	2.80171	0.201891
LOC112445127	0.56564	2.23607	2.80171	0.201891
LOC112445137	0.56564	2.23607	2.80171	0.201891
LOC112445141	0.56564	2.23607	2.80171	0.201891
LOC112445143	0.56564	2.23607	2.80171	0.201891
LOC112445200	0.56564	2.23607	2.80171	0.201891
LOC112445208	0.56564	2.23607	2.80171	0.201891
LOC112445877	0.56564	2.23607	2.80171	0.201891
LOC112445920	0.56564	2.23607	2.80171	0.201891
LOC112445955	0.56564	2.23607	2.80171	0.201891
LOC112445956	0.56564	2.23607	2.80171	0.201891
LOC112446052	0.56564	2.23607	2.80171	0.201891
LOC112446116	0.56564	2.23607	2.80171	0.201891
LOC112446339	0.56564	2.23607	2.80171	0.201891
LOC112446366	0.56564	2.23607	2.80171	0.201891
LOC112446369	0.56564	2.23607	2.80171	0.201891
LOC112446378	0.56564	2.23607	2.80171	0.201891
LOC112446393	0.56564	2.23607	2.80171	0.201891
LOC112446395	0.56564	2.23607	2.80171	0.201891
LOC112446459	0.56564	2.23607	2.80171	0.201891
LOC112446473	0.56564	2.23607	2.80171	0.201891
LOC112446645	0.56564	2.23607	2.80171	0.201891
LOC112446661	0.56564	2.23607	2.80171	0.201891
LOC112446663	0.56564	2.23607	2.80171	0.201891
LOC112446665	0.56564	2.23607	2.80171	0.201891
LOC112446689	0.56564	2.23607	2.80171	0.201891
LOC112446697	0.56564	2.23607	2.80171	0.201891
LOC112446720	0.56564	2.23607	2.80171	0.201891
LOC112446762	0.56564	2.23607	2.80171	0.201891
LOC112446788	0.56564	2.23607	2.80171	0.201891
LOC112446797	0.56564	2.23607	2.80171	0.201891
LOC112446982	0.56564	2.23607	2.80171	0.201891
LOC112447038	0.56564	2.23607	2.80171	0.201891
LOC112447039	0.56564	2.23607	2.80171	0.201891
LOC112447048	0.56564	2.23607	2.80171	0.201891
LOC112447050	0.56564	2.23607	2.80171	0.201891
LOC112447072	0.56564	2.23607	2.80171	0.201891
LOC112447075	0.56564	2.23607	2.80171	0.201891
LOC112447078	0.56564	2.23607	2.80171	0.201891
LOC112447096	0.56564	2.23607	2.80171	0.201891
LOC112447105	0.56564	2.23607	2.80171	0.201891
LOC112447113	0.56564	2.23607	2.80171	0.201891
LOC112447136	0.56564	2.23607	2.80171	0.201891
LOC112447148	0.56564	2.23607	2.80171	0.201891
LOC112447173	0.56564	2.23607	2.80171	0.201891
LOC112447299	0.56564	2.23607	2.80171	0.201891
LOC112447323	0.56564	2.23607	2.80171	0.201891
LOC112447354	0.56564	2.23607	2.80171	0.201891
LOC112447388	0.56564	2.23607	2.80171	0.201891
LOC112447391	0.56564	2.23607	2.80171	0.201891
LOC112447470	0.56564	2.23607	2.80171	0.201891
LOC112447495	0.56564	2.23607	2.80171	0.201891
LOC112447556	0.56564	2.23607	2.80171	0.201891
LOC112447565	0.56564	2.23607	2.80171	0.201891
LOC112447806	0.56564	2.23607	2.80171	0.201891
LOC112447829	0.56564	2.23607	2.80171	0.201891
LOC112447832	0.56564	2.23607	2.80171	0.201891
LOC112447836	0.56564	2.23607	2.80171	0.201891
LOC112447842	0.56564	2.23607	2.80171	0.201891
LOC112447847	0.56564	2.23607	2.80171	0.201891
LOC112447887	0.56564	2.23607	2.80171	0.201891
LOC112448002	0.56564	2.23607	2.80171	0.201891
LOC112448024	0.56564	2.23607	2.80171	0.201891
LOC112448035	0.56564	2.23607	2.80171	0.201891
LOC112448078	0.56564	2.23607	2.80171	0.201891
LOC112448080	0.56564	2.23607	2.80171	0.201891
LOC112448096	0.56564	2.23607	2.80171	0.201891
LOC112448368	0.56564	2.23607	2.80171	0.201891
LOC112448376	0.56564	2.23607	2.80171	0.201891
LOC112448388	0.56564	2.23607	2.80171	0.201891
LOC112448447	0.56564	2.23607	2.80171	0.201891
LOC112448487	0.56564	2.23607	2.80171	0.201891
LOC112448512	0.56564	2.23607	2.80171	0.201891
LOC112448513	0.56564	2.23607	2.80171	0.201891
LOC112448519	0.56564	2.23607	2.80171	0.201891
LOC112448529	0.56564	2.23607	2.80171	0.201891
LOC112448564	0.56564	2.23607	2.80171	0.201891
LOC112448570	0.56564	2.23607	2.80171	0.201891
LOC112448733	0.56564	2.23607	2.80171	0.201891
LOC112448736	0.56564	2.23607	2.80171	0.201891
LOC112448741	0.56564	2.23607	2.80171	0.201891
LOC112448761	0.56564	2.23607	2.80171	0.201891
LOC112448767	0.56564	2.23607	2.80171	0.201891
LOC112448796	0.56564	2.23607	2.80171	0.201891
LOC112448826	0.56564	2.23607	2.80171	0.201891
LOC112448836	0.56564	2.23607	2.80171	0.201891
LOC112448850	0.56564	2.23607	2.80171	0.201891
LOC112448863	0.56564	2.23607	2.80171	0.201891
LOC112449035	0.56564	2.23607	2.80171	0.201891
LOC112449036	0.56564	2.23607	2.80171	0.201891
LOC112449038	0.56564	2.23607	2.80171	0.201891
LOC112449076	0.56564	2.23607	2.80171	0.201891
LOC112449081	0.56564	2.23607	2.80171	0.201891
LOC112449109	0.56564	2.23607	2.80171	0.201891
LOC112449147	0.56564	2.23607	2.80171	0.201891
LOC112449249	0.56564	2.23607	2.80171	0.201891
LOC112449254	0.56564	2.23607	2.80171	0.201891
LOC112449276	0.56564	2.23607	2.80171	0.201891
LOC112449279	0.56564	2.23607	2.80171	0.201891
LOC112449284	0.56564	2.23607	2.80171	0.201891
LOC112449287	0.56564	2.23607	2.80171	0.201891
LOC112449313	0.56564	2.23607	2.80171	0.201891
LOC112449332	0.56564	2.23607	2.80171	0.201891
LOC112449337	0.56564	2.23607	2.80171	0.201891
LOC112449338	0.56564	2.23607	2.80171	0.201891
LOC112449341	0.56564	2.23607	2.80171	0.201891
LOC112449381	0.56564	2.23607	2.80171	0.201891
LOC112449527	0.56564	2.23607	2.80171	0.201891
LOC112449562	0.56564	2.23607	2.80171	0.201891
LOC504858	0.56564	2.23607	2.80171	0.201891
LOC506652	0.56564	2.23607	2.80171	0.201891
LOC506868	0.56564	2.23607	2.80171	0.201891
LOC508153	0.56564	2.23607	2.80171	0.201891
LOC508455	0.56564	2.23607	2.80171	0.201891
LOC510520	0.56564	2.23607	2.80171	0.201891
LOC511400	0.56564	2.23607	2.80171	0.201891
LOC511617	0.56564	2.23607	2.80171	0.201891
LOC512441	0.56564	2.23607	2.80171	0.201891
LOC512612	0.56564	2.23607	2.80171	0.201891
LOC512672	0.56564	2.23607	2.80171	0.201891
LOC514257	0.56564	2.23607	2.80171	0.201891
LOC519282	0.56564	2.23607	2.80171	0.201891
LOC523083	0.56564	2.23607	2.80171	0.201891
LOC523244	0.56564	2.23607	2.80171	0.201891
LOC526149	0.56564	2.23607	2.80171	0.201891
LOC526335	0.56564	2.23607	2.80171	0.201891
LOC527335	0.56564	2.23607	2.80171	0.201891
LOC527384	0.56564	2.23607	2.80171	0.201891
LOC527779	0.56564	2.23607	2.80171	0.201891
LOC528262	0.56564	2.23607	2.80171	0.201891
LOC528767	0.56564	2.23607	2.80171	0.201891
LOC529930	0.56564	2.23607	2.80171	0.201891
LOC530068	0.56564	2.23607	2.80171	0.201891
LOC531571	0.56564	2.23607	2.80171	0.201891
LOC538620	0.56564	2.23607	2.80171	0.201891
LOC614416	0.56564	2.23607	2.80171	0.201891
LOC615559	0.56564	2.23607	2.80171	0.201891
LOC616860	0.56564	2.23607	2.80171	0.201891
LOC617135	0.56564	2.23607	2.80171	0.201891
LOC617141	0.56564	2.23607	2.80171	0.201891
LOC618071	0.56564	2.23607	2.80171	0.201891
LOC618220	0.56564	2.23607	2.80171	0.201891
LOC618367	0.56564	2.23607	2.80171	0.201891
LOC618859	0.56564	2.23607	2.80171	0.201891
LOC619094	0.56564	2.23607	2.80171	0.201891
LOC619159	0.56564	2.23607	2.80171	0.201891
LOC781562	0.56564	2.23607	2.80171	0.201891
LOC783202	0.56564	2.23607	2.80171	0.201891
LOC783224	0.56564	2.23607	2.80171	0.201891
LOC783313	0.56564	2.23607	2.80171	0.201891
LOC783535	0.56564	2.23607	2.80171	0.201891
LOC783945	0.56564	2.23607	2.80171	0.201891
LOC784052	0.56564	2.23607	2.80171	0.201891
LOC784148	0.56564	2.23607	2.80171	0.201891
LOC784603	0.56564	2.23607	2.80171	0.201891
LOC784922	0.56564	2.23607	2.80171	0.201891
LOC785256	0.56564	2.23607	2.80171	0.201891
LOC785445	0.56564	2.23607	2.80171	0.201891
LOC785500	0.56564	2.23607	2.80171	0.201891
LOC785804	0.56564	2.23607	2.80171	0.201891
LOC786065	0.56564	2.23607	2.80171	0.201891
LOC788364	0.56564	2.23607	2.80171	0.201891
LOC788425	0.56564	2.23607	2.80171	0.201891
LOC788915	0.56564	2.23607	2.80171	0.201891
LOC789018	0.56564	2.23607	2.80171	0.201891
LOC789898	0.56564	2.23607	2.80171	0.201891
LOC790024	0.56564	2.23607	2.80171	0.201891
LRP3	0.56564	2.23607	2.80171	0.201891
LRRC26	0.56564	2.23607	2.80171	0.201891
LRRC3C	0.56564	2.23607	2.80171	0.201891
LRRC55	0.56564	2.23607	2.80171	0.201891
LYL1	0.56564	2.23607	2.80171	0.201891
LYZL6	0.56564	2.23607	2.80171	0.201891
MARCO	0.56564	2.23607	2.80171	0.201891
MBL1	0.56564	2.23607	2.80171	0.201891
MCEMP1	0.56564	2.23607	2.80171	0.201891
METTL27	0.56564	2.23607	2.80171	0.201891
MGAT4D	0.56564	2.23607	2.80171	0.201891
MGLL	0.56564	2.23607	2.80171	0.201891
MLPH	0.56564	2.23607	2.80171	0.201891
MMRN2	0.56564	2.23607	2.80171	0.201891
MORN3	0.56564	2.23607	2.80171	0.201891
MYH4	0.56564	2.23607	2.80171	0.201891
MYO7B	0.56564	2.23607	2.80171	0.201891
NCF4	0.56564	2.23607	2.80171	0.201891
NCR3	0.56564	2.23607	2.80171	0.201891
NEUROG1	0.56564	2.23607	2.80171	0.201891
NGB	0.56564	2.23607	2.80171	0.201891
NKD2	0.56564	2.23607	2.80171	0.201891
NLRC3	0.56564	2.23607	2.80171	0.201891
NOTCH3	0.56564	2.23607	2.80171	0.201891
NOVA2	0.56564	2.23607	2.80171	0.201891
NPHS1	0.56564	2.23607	2.80171	0.201891
NT5C1A	0.56564	2.23607	2.80171	0.201891
NT5C1B	0.56564	2.23607	2.80171	0.201891
NT5DC4	0.56564	2.23607	2.80171	0.201891
ODF3B	0.56564	2.23607	2.80171	0.201891
OLIG2	0.56564	2.23607	2.80171	0.201891
ONECUT3	0.56564	2.23607	2.80171	0.201891
OPRM1	0.56564	2.23607	2.80171	0.201891
OR1I1	0.56564	2.23607	2.80171	0.201891
OR52N5	0.56564	2.23607	2.80171	0.201891
OSCAR	0.56564	2.23607	2.80171	0.201891
PAEP	0.56564	2.23607	2.80171	0.201891
PANX2	0.56564	2.23607	2.80171	0.201891
PATE2	0.56564	2.23607	2.80171	0.201891
PCP2	0.56564	2.23607	2.80171	0.201891
PGLYRP3	0.56564	2.23607	2.80171	0.201891
PKNOX2	0.56564	2.23607	2.80171	0.201891
PLCXD1	0.56564	2.23607	2.80171	0.201891
PLSCR5	0.56564	2.23607	2.80171	0.201891
PNCK	0.56564	2.23607	2.80171	0.201891
PNMT	0.56564	2.23607	2.80171	0.201891
POSTN	0.56564	2.23607	2.80171	0.201891
POU4F2	0.56564	2.23607	2.80171	0.201891
PQLC1	0.56564	2.23607	2.80171	0.201891
PRKAG3	0.56564	2.23607	2.80171	0.201891
PRMT8	0.56564	2.23607	2.80171	0.201891
PRR22	0.56564	2.23607	2.80171	0.201891
PRRT2	0.56564	2.23607	2.80171	0.201891
PRSS54	0.56564	2.23607	2.80171	0.201891
PRSS8	0.56564	2.23607	2.80171	0.201891
PRTN3	0.56564	2.23607	2.80171	0.201891
PSMB11	0.56564	2.23607	2.80171	0.201891
PTGES	0.56564	2.23607	2.80171	0.201891
PTPRCAP	0.56564	2.23607	2.80171	0.201891
PTPRH	0.56564	2.23607	2.80171	0.201891
PYGL	0.56564	2.23607	2.80171	0.201891
RASAL3	0.56564	2.23607	2.80171	0.201891
RBKS	0.56564	2.23607	2.80171	0.201891
REELD1	0.56564	2.23607	2.80171	0.201891
RFX4	0.56564	2.23607	2.80171	0.201891
RHBDL1	0.56564	2.23607	2.80171	0.201891
RIN1	0.56564	2.23607	2.80171	0.201891
RNASEL	0.56564	2.23607	2.80171	0.201891
RNF183	0.56564	2.23607	2.80171	0.201891
RTL5	0.56564	2.23607	2.80171	0.201891
RUFY4	0.56564	2.23607	2.80171	0.201891
S100A13	0.56564	2.23607	2.80171	0.201891
S100A3	0.56564	2.23607	2.80171	0.201891
SAG	0.56564	2.23607	2.80171	0.201891
SAMD10	0.56564	2.23607	2.80171	0.201891
SAO	0.56564	2.23607	2.80171	0.201891
SAP25	0.56564	2.23607	2.80171	0.201891
SCN1B	0.56564	2.23607	2.80171	0.201891
SCRT1	0.56564	2.23607	2.80171	0.201891
SDCBP2	0.56564	2.23607	2.80171	0.201891
SEC14L3	0.56564	2.23607	2.80171	0.201891
45545	0.56564	2.23607	2.80171	0.201891
SFTPA1	0.56564	2.23607	2.80171	0.201891
SHISA8	0.56564	2.23607	2.80171	0.201891
SIRPB2	0.56564	2.23607	2.80171	0.201891
SIT1	0.56564	2.23607	2.80171	0.201891
SIX4	0.56564	2.23607	2.80171	0.201891
SLC22A13	0.56564	2.23607	2.80171	0.201891
SLC25A48	0.56564	2.23607	2.80171	0.201891
SLC2A9	0.56564	2.23607	2.80171	0.201891
SMIM5	0.56564	2.23607	2.80171	0.201891
SMLR1	0.56564	2.23607	2.80171	0.201891
SMYD1	0.56564	2.23607	2.80171	0.201891
SOX10	0.56564	2.23607	2.80171	0.201891
SP7	0.56564	2.23607	2.80171	0.201891
SPATA17	0.56564	2.23607	2.80171	0.201891
SPATA18	0.56564	2.23607	2.80171	0.201891
SPEM1	0.56564	2.23607	2.80171	0.201891
SPINT3	0.56564	2.23607	2.80171	0.201891
SPO11	0.56564	2.23607	2.80171	0.201891
SRL	0.56564	2.23607	2.80171	0.201891
SST	0.56564	2.23607	2.80171	0.201891
STAC	0.56564	2.23607	2.80171	0.201891
SULT1C4	0.56564	2.23607	2.80171	0.201891
SULT6B1	0.56564	2.23607	2.80171	0.201891
TBR1	0.56564	2.23607	2.80171	0.201891
TEX28	0.56564	2.23607	2.80171	0.201891
TIGD3	0.56564	2.23607	2.80171	0.201891
TM4SF18	0.56564	2.23607	2.80171	0.201891
TM4SF20	0.56564	2.23607	2.80171	0.201891
TMEM121B	0.56564	2.23607	2.80171	0.201891
TMEM176B	0.56564	2.23607	2.80171	0.201891
TMIGD3	0.56564	2.23607	2.80171	0.201891
TMPRSS11A	0.56564	2.23607	2.80171	0.201891
TMPRSS12	0.56564	2.23607	2.80171	0.201891
TNXB	0.56564	2.23607	2.80171	0.201891
TREML2	0.56564	2.23607	2.80171	0.201891
TRIM29	0.56564	2.23607	2.80171	0.201891
TRIM56	0.56564	2.23607	2.80171	0.201891
TRIM72	0.56564	2.23607	2.80171	0.201891
TSGA13	0.56564	2.23607	2.80171	0.201891
UBE2QL1	0.56564	2.23607	2.80171	0.201891
UBL4B	0.56564	2.23607	2.80171	0.201891
UGT1A6	0.56564	2.23607	2.80171	0.201891
UNC93A	0.56564	2.23607	2.80171	0.201891
UPK3BL1	0.56564	2.23607	2.80171	0.201891
USHBP1	0.56564	2.23607	2.80171	0.201891
UTS2	0.56564	2.23607	2.80171	0.201891
VASH2	0.56564	2.23607	2.80171	0.201891
VGLL3	0.56564	2.23607	2.80171	0.201891
VMO1	0.56564	2.23607	2.80171	0.201891
WBP1	0.56564	2.23607	2.80171	0.201891
WFDC2	0.56564	2.23607	2.80171	0.201891
XCL1	0.56564	2.23607	2.80171	0.201891
YIPF7	0.56564	2.23607	2.80171	0.201891
ZG16	0.56564	2.23607	2.80171	0.201891
ZMAT1	0.56564	2.23607	2.80171	0.201891
ZNF213	0.56564	2.23607	2.80171	0.201891
ZNF385D	0.56564	2.23607	2.80171	0.201891
ZNF48	0.56564	2.23607	2.80171	0.201891
ZNF580	0.56564	2.23607	2.80171	0.201891
ZNF787	0.56564	2.23607	2.80171	0.201891
ZNF233	0.565652	2.23607	2.80172	0.201895
ADNCR	0.565662	2.23607	2.80173	0.201897
AADACL3	0.565663	2.23607	2.80173	0.201898
ADAMTS15	0.565663	2.23607	2.80173	0.201898
ADRA2C	0.565663	2.23607	2.80173	0.201898
ADRB1	0.565663	2.23607	2.80173	0.201898
AFM	0.565663	2.23607	2.80173	0.201898
ALS2CL	0.565663	2.23607	2.80173	0.201898
ANGPT2	0.565663	2.23607	2.80173	0.201898
ANKRD66	0.565663	2.23607	2.80173	0.201898
ARGFX	0.565663	2.23607	2.80173	0.201898
ARHGEF19	0.565663	2.23607	2.80173	0.201898
ASCL3	0.565663	2.23607	2.80173	0.201898
AWAT1	0.565663	2.23607	2.80173	0.201898
BEST1	0.565663	2.23607	2.80173	0.201898
BOLA-DOB	0.565663	2.23607	2.80173	0.201898
BOLA-DYB	0.565663	2.23607	2.80173	0.201898
BOSTAUV1R416	0.565663	2.23607	2.80173	0.201898
C11H2orf40	0.565663	2.23607	2.80173	0.201898
C12H13orf46	0.565663	2.23607	2.80173	0.201898
C19H17orf47	0.565663	2.23607	2.80173	0.201898
C2CD4C	0.565663	2.23607	2.80173	0.201898
C8H8orf74	0.565663	2.23607	2.80173	0.201898
CACNA1S	0.565663	2.23607	2.80173	0.201898
CALHM2	0.565663	2.23607	2.80173	0.201898
CCER2	0.565663	2.23607	2.80173	0.201898
CD160	0.565663	2.23607	2.80173	0.201898
CEL	0.565663	2.23607	2.80173	0.201898
CERK	0.565663	2.23607	2.80173	0.201898
CHRNA2	0.565663	2.23607	2.80173	0.201898
CLDN4	0.565663	2.23607	2.80173	0.201898
CLEC6A	0.565663	2.23607	2.80173	0.201898
CLMN	0.565663	2.23607	2.80173	0.201898
CLNK	0.565663	2.23607	2.80173	0.201898
COL13A1	0.565663	2.23607	2.80173	0.201898
CRACR2A	0.565663	2.23607	2.80173	0.201898
CRISP3	0.565663	2.23607	2.80173	0.201898
CTF1	0.565663	2.23607	2.80173	0.201898
CXCL5	0.565663	2.23607	2.80173	0.201898
CXCL8	0.565663	2.23607	2.80173	0.201898
CYBA	0.565663	2.23607	2.80173	0.201898
CYSRT1	0.565663	2.23607	2.80173	0.201898
DACT2	0.565663	2.23607	2.80173	0.201898
DDI1	0.565663	2.23607	2.80173	0.201898
DEFB123	0.565663	2.23607	2.80173	0.201898
DIO1	0.565663	2.23607	2.80173	0.201898
DKKL1	0.565663	2.23607	2.80173	0.201898
DOK3	0.565663	2.23607	2.80173	0.201898
DQX1	0.565663	2.23607	2.80173	0.201898
DUSP2	0.565663	2.23607	2.80173	0.201898
EFCAB1	0.565663	2.23607	2.80173	0.201898
EMB	0.565663	2.23607	2.80173	0.201898
EPHA3	0.565663	2.23607	2.80173	0.201898
ETV2	0.565663	2.23607	2.80173	0.201898
EVPL	0.565663	2.23607	2.80173	0.201898
FAM167B	0.565663	2.23607	2.80173	0.201898
FAM180B	0.565663	2.23607	2.80173	0.201898
FAM189A1	0.565663	2.23607	2.80173	0.201898
FGFRL1	0.565663	2.23607	2.80173	0.201898
FJX1	0.565663	2.23607	2.80173	0.201898
FOXH1	0.565663	2.23607	2.80173	0.201898
FREM3	0.565663	2.23607	2.80173	0.201898
GGT1	0.565663	2.23607	2.80173	0.201898
GIMAP7	0.565663	2.23607	2.80173	0.201898
GJB7	0.565663	2.23607	2.80173	0.201898
GJC3	0.565663	2.23607	2.80173	0.201898
GLTPD2	0.565663	2.23607	2.80173	0.201898
GPR18	0.565663	2.23607	2.80173	0.201898
GPX3	0.565663	2.23607	2.80173	0.201898
HK3	0.565663	2.23607	2.80173	0.201898
HOXC12	0.565663	2.23607	2.80173	0.201898
HPX	0.565663	2.23607	2.80173	0.201898
HS6ST1	0.565663	2.23607	2.80173	0.201898
HSD17B2	0.565663	2.23607	2.80173	0.201898
HSD17B6	0.565663	2.23607	2.80173	0.201898
IDO2	0.565663	2.23607	2.80173	0.201898
IFNAH	0.565663	2.23607	2.80173	0.201898
IL17RC	0.565663	2.23607	2.80173	0.201898
IL17REL	0.565663	2.23607	2.80173	0.201898
ISG12(B)	0.565663	2.23607	2.80173	0.201898
ISLR	0.565663	2.23607	2.80173	0.201898
ISM2	0.565663	2.23607	2.80173	0.201898
KCNE4	0.565663	2.23607	2.80173	0.201898
KCNIP2	0.565663	2.23607	2.80173	0.201898
KCNJ5	0.565663	2.23607	2.80173	0.201898
KCNK12	0.565663	2.23607	2.80173	0.201898
KCNK6	0.565663	2.23607	2.80173	0.201898
KIRREL3	0.565663	2.23607	2.80173	0.201898
KLF14	0.565663	2.23607	2.80173	0.201898
KLHL10	0.565663	2.23607	2.80173	0.201898
KNCN	0.565663	2.23607	2.80173	0.201898
KRT80	0.565663	2.23607	2.80173	0.201898
KRT81	0.565663	2.23607	2.80173	0.201898
KRT84	0.565663	2.23607	2.80173	0.201898
LGALS9	0.565663	2.23607	2.80173	0.201898
LGI4	0.565663	2.23607	2.80173	0.201898
LMAN1L	0.565663	2.23607	2.80173	0.201898
LOC100125266	0.565663	2.23607	2.80173	0.201898
LOC100295015	0.565663	2.23607	2.80173	0.201898
LOC100337234	0.565663	2.23607	2.80173	0.201898
LOC100847644	0.565663	2.23607	2.80173	0.201898
LOC100848658	0.565663	2.23607	2.80173	0.201898
LOC100848933	0.565663	2.23607	2.80173	0.201898
LOC100848995	0.565663	2.23607	2.80173	0.201898
LOC101902451	0.565663	2.23607	2.80173	0.201898
LOC101902630	0.565663	2.23607	2.80173	0.201898
LOC101902854	0.565663	2.23607	2.80173	0.201898
LOC101903449	0.565663	2.23607	2.80173	0.201898
LOC101903633	0.565663	2.23607	2.80173	0.201898
LOC101903854	0.565663	2.23607	2.80173	0.201898
LOC101903891	0.565663	2.23607	2.80173	0.201898
LOC101904130	0.565663	2.23607	2.80173	0.201898
LOC101904191	0.565663	2.23607	2.80173	0.201898
LOC101904344	0.565663	2.23607	2.80173	0.201898
LOC101904605	0.565663	2.23607	2.80173	0.201898
LOC101904639	0.565663	2.23607	2.80173	0.201898
LOC101904668	0.565663	2.23607	2.80173	0.201898
LOC101904948	0.565663	2.23607	2.80173	0.201898
LOC101905166	0.565663	2.23607	2.80173	0.201898
LOC101905381	0.565663	2.23607	2.80173	0.201898
LOC101905571	0.565663	2.23607	2.80173	0.201898
LOC101905963	0.565663	2.23607	2.80173	0.201898
LOC101906101	0.565663	2.23607	2.80173	0.201898
LOC101906105	0.565663	2.23607	2.80173	0.201898
LOC101907729	0.565663	2.23607	2.80173	0.201898
LOC101909690	0.565663	2.23607	2.80173	0.201898
LOC104968954	0.565663	2.23607	2.80173	0.201898
LOC104969038	0.565663	2.23607	2.80173	0.201898
LOC104969115	0.565663	2.23607	2.80173	0.201898
LOC104970340	0.565663	2.23607	2.80173	0.201898
LOC104970815	0.565663	2.23607	2.80173	0.201898
LOC104971021	0.565663	2.23607	2.80173	0.201898
LOC104971464	0.565663	2.23607	2.80173	0.201898
LOC104971585	0.565663	2.23607	2.80173	0.201898
LOC104971814	0.565663	2.23607	2.80173	0.201898
LOC104972118	0.565663	2.23607	2.80173	0.201898
LOC104972256	0.565663	2.23607	2.80173	0.201898
LOC104972622	0.565663	2.23607	2.80173	0.201898
LOC104972787	0.565663	2.23607	2.80173	0.201898
LOC104972955	0.565663	2.23607	2.80173	0.201898
LOC104973073	0.565663	2.23607	2.80173	0.201898
LOC104973139	0.565663	2.23607	2.80173	0.201898
LOC104973656	0.565663	2.23607	2.80173	0.201898
LOC104973826	0.565663	2.23607	2.80173	0.201898
LOC104973899	0.565663	2.23607	2.80173	0.201898
LOC104974100	0.565663	2.23607	2.80173	0.201898
LOC104974905	0.565663	2.23607	2.80173	0.201898
LOC104974928	0.565663	2.23607	2.80173	0.201898
LOC104975134	0.565663	2.23607	2.80173	0.201898
LOC104975170	0.565663	2.23607	2.80173	0.201898
LOC104975781	0.565663	2.23607	2.80173	0.201898
LOC104976082	0.565663	2.23607	2.80173	0.201898
LOC104976116	0.565663	2.23607	2.80173	0.201898
LOC104976284	0.565663	2.23607	2.80173	0.201898
LOC107131332	0.565663	2.23607	2.80173	0.201898
LOC107131368	0.565663	2.23607	2.80173	0.201898
LOC107131422	0.565663	2.23607	2.80173	0.201898
LOC107131473	0.565663	2.23607	2.80173	0.201898
LOC107131589	0.565663	2.23607	2.80173	0.201898
LOC107131781	0.565663	2.23607	2.80173	0.201898
LOC107131849	0.565663	2.23607	2.80173	0.201898
LOC107131971	0.565663	2.23607	2.80173	0.201898
LOC107132664	0.565663	2.23607	2.80173	0.201898
LOC107132813	0.565663	2.23607	2.80173	0.201898
LOC107133005	0.565663	2.23607	2.80173	0.201898
LOC107133045	0.565663	2.23607	2.80173	0.201898
LOC107133137	0.565663	2.23607	2.80173	0.201898
LOC107133263	0.565663	2.23607	2.80173	0.201898
LOC107133272	0.565663	2.23607	2.80173	0.201898
LOC107133302	0.565663	2.23607	2.80173	0.201898
LOC107133323	0.565663	2.23607	2.80173	0.201898
LOC112441481	0.565663	2.23607	2.80173	0.201898
LOC112441493	0.565663	2.23607	2.80173	0.201898
LOC112441595	0.565663	2.23607	2.80173	0.201898
LOC112441630	0.565663	2.23607	2.80173	0.201898
LOC112441636	0.565663	2.23607	2.80173	0.201898
LOC112441643	0.565663	2.23607	2.80173	0.201898
LOC112441659	0.565663	2.23607	2.80173	0.201898
LOC112441666	0.565663	2.23607	2.80173	0.201898
LOC112441812	0.565663	2.23607	2.80173	0.201898
LOC112441843	0.565663	2.23607	2.80173	0.201898
LOC112441996	0.565663	2.23607	2.80173	0.201898
LOC112442056	0.565663	2.23607	2.80173	0.201898
LOC112442060	0.565663	2.23607	2.80173	0.201898
LOC112442224	0.565663	2.23607	2.80173	0.201898
LOC112442566	0.565663	2.23607	2.80173	0.201898
LOC112442689	0.565663	2.23607	2.80173	0.201898
LOC112442708	0.565663	2.23607	2.80173	0.201898
LOC112442989	0.565663	2.23607	2.80173	0.201898
LOC112442993	0.565663	2.23607	2.80173	0.201898
LOC112443002	0.565663	2.23607	2.80173	0.201898
LOC112443033	0.565663	2.23607	2.80173	0.201898
LOC112443127	0.565663	2.23607	2.80173	0.201898
LOC112443154	0.565663	2.23607	2.80173	0.201898
LOC112443155	0.565663	2.23607	2.80173	0.201898
LOC112443170	0.565663	2.23607	2.80173	0.201898
LOC112443179	0.565663	2.23607	2.80173	0.201898
LOC112443206	0.565663	2.23607	2.80173	0.201898
LOC112443405	0.565663	2.23607	2.80173	0.201898
LOC112443431	0.565663	2.23607	2.80173	0.201898
LOC112443432	0.565663	2.23607	2.80173	0.201898
LOC112443437	0.565663	2.23607	2.80173	0.201898
LOC112443495	0.565663	2.23607	2.80173	0.201898
LOC112443826	0.565663	2.23607	2.80173	0.201898
LOC112443858	0.565663	2.23607	2.80173	0.201898
LOC112444146	0.565663	2.23607	2.80173	0.201898
LOC112444295	0.565663	2.23607	2.80173	0.201898
LOC112444324	0.565663	2.23607	2.80173	0.201898
LOC112444329	0.565663	2.23607	2.80173	0.201898
LOC112444333	0.565663	2.23607	2.80173	0.201898
LOC112444336	0.565663	2.23607	2.80173	0.201898
LOC112444339	0.565663	2.23607	2.80173	0.201898
LOC112444342	0.565663	2.23607	2.80173	0.201898
LOC112444504	0.565663	2.23607	2.80173	0.201898
LOC112444610	0.565663	2.23607	2.80173	0.201898
LOC112444615	0.565663	2.23607	2.80173	0.201898
LOC112444619	0.565663	2.23607	2.80173	0.201898
LOC112444648	0.565663	2.23607	2.80173	0.201898
LOC112444650	0.565663	2.23607	2.80173	0.201898
LOC112445064	0.565663	2.23607	2.80173	0.201898
LOC112445104	0.565663	2.23607	2.80173	0.201898
LOC112445108	0.565663	2.23607	2.80173	0.201898
LOC112445185	0.565663	2.23607	2.80173	0.201898
LOC112445890	0.565663	2.23607	2.80173	0.201898
LOC112445923	0.565663	2.23607	2.80173	0.201898
LOC112445927	0.565663	2.23607	2.80173	0.201898
LOC112445948	0.565663	2.23607	2.80173	0.201898
LOC112445951	0.565663	2.23607	2.80173	0.201898
LOC112445963	0.565663	2.23607	2.80173	0.201898
LOC112445981	0.565663	2.23607	2.80173	0.201898
LOC112445983	0.565663	2.23607	2.80173	0.201898
LOC112446010	0.565663	2.23607	2.80173	0.201898
LOC112446039	0.565663	2.23607	2.80173	0.201898
LOC112446117	0.565663	2.23607	2.80173	0.201898
LOC112446321	0.565663	2.23607	2.80173	0.201898
LOC112446350	0.565663	2.23607	2.80173	0.201898
LOC112446673	0.565663	2.23607	2.80173	0.201898
LOC112446681	0.565663	2.23607	2.80173	0.201898
LOC112446758	0.565663	2.23607	2.80173	0.201898
LOC112446772	0.565663	2.23607	2.80173	0.201898
LOC112447117	0.565663	2.23607	2.80173	0.201898
LOC112447150	0.565663	2.23607	2.80173	0.201898
LOC112447157	0.565663	2.23607	2.80173	0.201898
LOC112447326	0.565663	2.23607	2.80173	0.201898
LOC112447342	0.565663	2.23607	2.80173	0.201898
LOC112447356	0.565663	2.23607	2.80173	0.201898
LOC112447403	0.565663	2.23607	2.80173	0.201898
LOC112447414	0.565663	2.23607	2.80173	0.201898
LOC112447494	0.565663	2.23607	2.80173	0.201898
LOC112447743	0.565663	2.23607	2.80173	0.201898
LOC112447826	0.565663	2.23607	2.80173	0.201898
LOC112447843	0.565663	2.23607	2.80173	0.201898
LOC112447859	0.565663	2.23607	2.80173	0.201898
LOC112448029	0.565663	2.23607	2.80173	0.201898
LOC112448030	0.565663	2.23607	2.80173	0.201898
LOC112448045	0.565663	2.23607	2.80173	0.201898
LOC112448139	0.565663	2.23607	2.80173	0.201898
LOC112448516	0.565663	2.23607	2.80173	0.201898
LOC112448517	0.565663	2.23607	2.80173	0.201898
LOC112448524	0.565663	2.23607	2.80173	0.201898
LOC112448738	0.565663	2.23607	2.80173	0.201898
LOC112448810	0.565663	2.23607	2.80173	0.201898
LOC112448829	0.565663	2.23607	2.80173	0.201898
LOC112448856	0.565663	2.23607	2.80173	0.201898
LOC112449087	0.565663	2.23607	2.80173	0.201898
LOC112449101	0.565663	2.23607	2.80173	0.201898
LOC112449255	0.565663	2.23607	2.80173	0.201898
LOC112449260	0.565663	2.23607	2.80173	0.201898
LOC112449372	0.565663	2.23607	2.80173	0.201898
LOC112449547	0.565663	2.23607	2.80173	0.201898
LOC112449595	0.565663	2.23607	2.80173	0.201898
LOC506452	0.565663	2.23607	2.80173	0.201898
LOC506707	0.565663	2.23607	2.80173	0.201898
LOC511240	0.565663	2.23607	2.80173	0.201898
LOC511570	0.565663	2.23607	2.80173	0.201898
LOC512005	0.565663	2.23607	2.80173	0.201898
LOC515485	0.565663	2.23607	2.80173	0.201898
LOC521902	0.565663	2.23607	2.80173	0.201898
LOC529277	0.565663	2.23607	2.80173	0.201898
LOC531097	0.565663	2.23607	2.80173	0.201898
LOC531521	0.565663	2.23607	2.80173	0.201898
LOC539383	0.565663	2.23607	2.80173	0.201898
LOC613822	0.565663	2.23607	2.80173	0.201898
LOC615514	0.565663	2.23607	2.80173	0.201898
LOC615948	0.565663	2.23607	2.80173	0.201898
LOC616478	0.565663	2.23607	2.80173	0.201898
LOC616942	0.565663	2.23607	2.80173	0.201898
LOC616957	0.565663	2.23607	2.80173	0.201898
LOC616977	0.565663	2.23607	2.80173	0.201898
LOC618463	0.565663	2.23607	2.80173	0.201898
LOC618554	0.565663	2.23607	2.80173	0.201898
LOC768255	0.565663	2.23607	2.80173	0.201898
LOC781948	0.565663	2.23607	2.80173	0.201898
LOC782698	0.565663	2.23607	2.80173	0.201898
LOC783151	0.565663	2.23607	2.80173	0.201898
LOC787779	0.565663	2.23607	2.80173	0.201898
LOC790152	0.565663	2.23607	2.80173	0.201898
LRTM2	0.565663	2.23607	2.80173	0.201898
LTA	0.565663	2.23607	2.80173	0.201898
LY6G6E	0.565663	2.23607	2.80173	0.201898
LYZ	0.565663	2.23607	2.80173	0.201898
MAS1	0.565663	2.23607	2.80173	0.201898
MCCD1	0.565663	2.23607	2.80173	0.201898
MMP11	0.565663	2.23607	2.80173	0.201898
MMP13	0.565663	2.23607	2.80173	0.201898
MSGN1	0.565663	2.23607	2.80173	0.201898
MSS51	0.565663	2.23607	2.80173	0.201898
MT1E	0.565663	2.23607	2.80173	0.201898
MYLK4	0.565663	2.23607	2.80173	0.201898
MYO1F	0.565663	2.23607	2.80173	0.201898
MYOT	0.565663	2.23607	2.80173	0.201898
NKX6-1	0.565663	2.23607	2.80173	0.201898
NPB	0.565663	2.23607	2.80173	0.201898
NPBWR1	0.565663	2.23607	2.80173	0.201898
NPC1L1	0.565663	2.23607	2.80173	0.201898
NPPC	0.565663	2.23607	2.80173	0.201898
OLFM2	0.565663	2.23607	2.80173	0.201898
OPALIN	0.565663	2.23607	2.80173	0.201898
OR2AE1	0.565663	2.23607	2.80173	0.201898
OR4M1	0.565663	2.23607	2.80173	0.201898
OR52B6	0.565663	2.23607	2.80173	0.201898
OR52K1	0.565663	2.23607	2.80173	0.201898
PABPC4L	0.565663	2.23607	2.80173	0.201898
PAH	0.565663	2.23607	2.80173	0.201898
PAM16	0.565663	2.23607	2.80173	0.201898
PCDH12	0.565663	2.23607	2.80173	0.201898
PLAC8	0.565663	2.23607	2.80173	0.201898
PNLIPRP2	0.565663	2.23607	2.80173	0.201898
PPP1R3A	0.565663	2.23607	2.80173	0.201898
PTH	0.565663	2.23607	2.80173	0.201898
PTK2B	0.565663	2.23607	2.80173	0.201898
QRFPR	0.565663	2.23607	2.80173	0.201898
RAX	0.565663	2.23607	2.80173	0.201898
RFX8	0.565663	2.23607	2.80173	0.201898
RGR	0.565663	2.23607	2.80173	0.201898
SCP2D1	0.565663	2.23607	2.80173	0.201898
SDR9C7	0.565663	2.23607	2.80173	0.201898
SI	0.565663	2.23607	2.80173	0.201898
SLC22A1	0.565663	2.23607	2.80173	0.201898
SLC30A10	0.565663	2.23607	2.80173	0.201898
SLC36A3	0.565663	2.23607	2.80173	0.201898
SLC38A1	0.565663	2.23607	2.80173	0.201898
SMCO3	0.565663	2.23607	2.80173	0.201898
SMPDL3B	0.565663	2.23607	2.80173	0.201898
SNAI2	0.565663	2.23607	2.80173	0.201898
SP100	0.565663	2.23607	2.80173	0.201898
SPATA21	0.565663	2.23607	2.80173	0.201898
SPATA32	0.565663	2.23607	2.80173	0.201898
ST6GALNAC5	0.565663	2.23607	2.80173	0.201898
SULT2B1	0.565663	2.23607	2.80173	0.201898
SYNE3	0.565663	2.23607	2.80173	0.201898
T2R12	0.565663	2.23607	2.80173	0.201898
TAAR6	0.565663	2.23607	2.80173	0.201898
TESPA1	0.565663	2.23607	2.80173	0.201898
TEX50	0.565663	2.23607	2.80173	0.201898
TP53I11	0.565663	2.23607	2.80173	0.201898
TSSK2	0.565663	2.23607	2.80173	0.201898
VSTM1	0.565663	2.23607	2.80173	0.201898
VWA1	0.565663	2.23607	2.80173	0.201898
VWA3A	0.565663	2.23607	2.80173	0.201898
WNT4	0.565663	2.23607	2.80173	0.201898
WNT5B	0.565663	2.23607	2.80173	0.201898
ZNF112	0.565663	2.23607	2.80173	0.201898
LOC104972660	0.565668	2.23607	2.80174	0.201899
ADIG	0.56567	2.23607	2.80174	0.2019
ADRA2B	0.56567	2.23607	2.80174	0.2019
ADRB2	0.56567	2.23607	2.80174	0.2019
AGTR2	0.56567	2.23607	2.80174	0.2019
ANKRD23	0.56567	2.23607	2.80174	0.2019
APOOL	0.56567	2.23607	2.80174	0.2019
BATF2	0.56567	2.23607	2.80174	0.2019
C13H20orf173	0.56567	2.23607	2.80174	0.2019
C16H1orf115	0.56567	2.23607	2.80174	0.2019
CCDC110	0.56567	2.23607	2.80174	0.2019
CCL8	0.56567	2.23607	2.80174	0.2019
CDCP2	0.56567	2.23607	2.80174	0.2019
CDHR4	0.56567	2.23607	2.80174	0.2019
CES3	0.56567	2.23607	2.80174	0.2019
CHRM4	0.56567	2.23607	2.80174	0.2019
CNTN2	0.56567	2.23607	2.80174	0.2019
CRYBA2	0.56567	2.23607	2.80174	0.2019
CSN2	0.56567	2.23607	2.80174	0.2019
CTHRC1	0.56567	2.23607	2.80174	0.2019
CYP8B1	0.56567	2.23607	2.80174	0.2019
CYYR1	0.56567	2.23607	2.80174	0.2019
DALRD3	0.56567	2.23607	2.80174	0.2019
EFNA4	0.56567	2.23607	2.80174	0.2019
EXOC3L4	0.56567	2.23607	2.80174	0.2019
F11	0.56567	2.23607	2.80174	0.2019
FABP4	0.56567	2.23607	2.80174	0.2019
FAM57B	0.56567	2.23607	2.80174	0.2019
GPR22	0.56567	2.23607	2.80174	0.2019
GSG1	0.56567	2.23607	2.80174	0.2019
GYS2	0.56567	2.23607	2.80174	0.2019
GZMA	0.56567	2.23607	2.80174	0.2019
HCN1	0.56567	2.23607	2.80174	0.2019
IGSF5	0.56567	2.23607	2.80174	0.2019
IP6K3	0.56567	2.23607	2.80174	0.2019
ISLR2	0.56567	2.23607	2.80174	0.2019
KCNE2	0.56567	2.23607	2.80174	0.2019
KLHL33	0.56567	2.23607	2.80174	0.2019
KLRJ1	0.56567	2.23607	2.80174	0.2019
KRT12	0.56567	2.23607	2.80174	0.2019
KRT27	0.56567	2.23607	2.80174	0.2019
LGALS7	0.56567	2.23607	2.80174	0.2019
LOC100297708	0.56567	2.23607	2.80174	0.2019
LOC100337001	0.56567	2.23607	2.80174	0.2019
LOC100847661	0.56567	2.23607	2.80174	0.2019
LOC100848277	0.56567	2.23607	2.80174	0.2019
LOC101902265	0.56567	2.23607	2.80174	0.2019
LOC101903309	0.56567	2.23607	2.80174	0.2019
LOC101903501	0.56567	2.23607	2.80174	0.2019
LOC101904090	0.56567	2.23607	2.80174	0.2019
LOC101904324	0.56567	2.23607	2.80174	0.2019
LOC101904356	0.56567	2.23607	2.80174	0.2019
LOC101905099	0.56567	2.23607	2.80174	0.2019
LOC101905533	0.56567	2.23607	2.80174	0.2019
LOC101905593	0.56567	2.23607	2.80174	0.2019
LOC101906358	0.56567	2.23607	2.80174	0.2019
LOC101906863	0.56567	2.23607	2.80174	0.2019
LOC104969299	0.56567	2.23607	2.80174	0.2019
LOC104969653	0.56567	2.23607	2.80174	0.2019
LOC104970129	0.56567	2.23607	2.80174	0.2019
LOC104971390	0.56567	2.23607	2.80174	0.2019
LOC104972402	0.56567	2.23607	2.80174	0.2019
LOC104973229	0.56567	2.23607	2.80174	0.2019
LOC104973318	0.56567	2.23607	2.80174	0.2019
LOC104973489	0.56567	2.23607	2.80174	0.2019
LOC104973706	0.56567	2.23607	2.80174	0.2019
LOC104973739	0.56567	2.23607	2.80174	0.2019
LOC104974648	0.56567	2.23607	2.80174	0.2019
LOC104974829	0.56567	2.23607	2.80174	0.2019
LOC104975285	0.56567	2.23607	2.80174	0.2019
LOC104975492	0.56567	2.23607	2.80174	0.2019
LOC104975605	0.56567	2.23607	2.80174	0.2019
LOC104975814	0.56567	2.23607	2.80174	0.2019
LOC104976573	0.56567	2.23607	2.80174	0.2019
LOC107131424	0.56567	2.23607	2.80174	0.2019
LOC107131659	0.56567	2.23607	2.80174	0.2019
LOC107132006	0.56567	2.23607	2.80174	0.2019
LOC107132431	0.56567	2.23607	2.80174	0.2019
LOC107132458	0.56567	2.23607	2.80174	0.2019
LOC107132849	0.56567	2.23607	2.80174	0.2019
LOC112441888	0.56567	2.23607	2.80174	0.2019
LOC112441993	0.56567	2.23607	2.80174	0.2019
LOC112442013	0.56567	2.23607	2.80174	0.2019
LOC112442045	0.56567	2.23607	2.80174	0.2019
LOC112442080	0.56567	2.23607	2.80174	0.2019
LOC112442325	0.56567	2.23607	2.80174	0.2019
LOC112442402	0.56567	2.23607	2.80174	0.2019
LOC112442409	0.56567	2.23607	2.80174	0.2019
LOC112442577	0.56567	2.23607	2.80174	0.2019
LOC112442595	0.56567	2.23607	2.80174	0.2019
LOC112442609	0.56567	2.23607	2.80174	0.2019
LOC112442636	0.56567	2.23607	2.80174	0.2019
LOC112443414	0.56567	2.23607	2.80174	0.2019
LOC112443415	0.56567	2.23607	2.80174	0.2019
LOC112443447	0.56567	2.23607	2.80174	0.2019
LOC112443512	0.56567	2.23607	2.80174	0.2019
LOC112444486	0.56567	2.23607	2.80174	0.2019
LOC112444492	0.56567	2.23607	2.80174	0.2019
LOC112444731	0.56567	2.23607	2.80174	0.2019
LOC112444752	0.56567	2.23607	2.80174	0.2019
LOC112444866	0.56567	2.23607	2.80174	0.2019
LOC112444873	0.56567	2.23607	2.80174	0.2019
LOC112445055	0.56567	2.23607	2.80174	0.2019
LOC112445994	0.56567	2.23607	2.80174	0.2019
LOC112446352	0.56567	2.23607	2.80174	0.2019
LOC112446449	0.56567	2.23607	2.80174	0.2019
LOC112446666	0.56567	2.23607	2.80174	0.2019
LOC112446722	0.56567	2.23607	2.80174	0.2019
LOC112447104	0.56567	2.23607	2.80174	0.2019
LOC112447368	0.56567	2.23607	2.80174	0.2019
LOC112447435	0.56567	2.23607	2.80174	0.2019
LOC112447467	0.56567	2.23607	2.80174	0.2019
LOC112447736	0.56567	2.23607	2.80174	0.2019
LOC112447771	0.56567	2.23607	2.80174	0.2019
LOC112447895	0.56567	2.23607	2.80174	0.2019
LOC112448026	0.56567	2.23607	2.80174	0.2019
LOC112448265	0.56567	2.23607	2.80174	0.2019
LOC112448808	0.56567	2.23607	2.80174	0.2019
LOC112448828	0.56567	2.23607	2.80174	0.2019
LOC112449033	0.56567	2.23607	2.80174	0.2019
LOC112449096	0.56567	2.23607	2.80174	0.2019
LOC112449097	0.56567	2.23607	2.80174	0.2019
LOC112449114	0.56567	2.23607	2.80174	0.2019
LOC112449115	0.56567	2.23607	2.80174	0.2019
LOC112449122	0.56567	2.23607	2.80174	0.2019
LOC112449380	0.56567	2.23607	2.80174	0.2019
LOC504570	0.56567	2.23607	2.80174	0.2019
LOC509761	0.56567	2.23607	2.80174	0.2019
LOC511937	0.56567	2.23607	2.80174	0.2019
LOC513869	0.56567	2.23607	2.80174	0.2019
LOC515600	0.56567	2.23607	2.80174	0.2019
LOC518464	0.56567	2.23607	2.80174	0.2019
LOC525033	0.56567	2.23607	2.80174	0.2019
LOC539818	0.56567	2.23607	2.80174	0.2019
LOC540615	0.56567	2.23607	2.80174	0.2019
LOC615303	0.56567	2.23607	2.80174	0.2019
LOC617592	0.56567	2.23607	2.80174	0.2019
LOC785216	0.56567	2.23607	2.80174	0.2019
LOC787225	0.56567	2.23607	2.80174	0.2019
LOC789748	0.56567	2.23607	2.80174	0.2019
LPAR5	0.56567	2.23607	2.80174	0.2019
LRRC3B	0.56567	2.23607	2.80174	0.2019
LRRC72	0.56567	2.23607	2.80174	0.2019
LRRIQ3	0.56567	2.23607	2.80174	0.2019
LRTM1	0.56567	2.23607	2.80174	0.2019
LVRN	0.56567	2.23607	2.80174	0.2019
MAMDC4	0.56567	2.23607	2.80174	0.2019
MAOB	0.56567	2.23607	2.80174	0.2019
MEDAG	0.56567	2.23607	2.80174	0.2019
MEP1A	0.56567	2.23607	2.80174	0.2019
MGAM	0.56567	2.23607	2.80174	0.2019
MYCN	0.56567	2.23607	2.80174	0.2019
NCEH1	0.56567	2.23607	2.80174	0.2019
NCR1	0.56567	2.23607	2.80174	0.2019
NEUROG3	0.56567	2.23607	2.80174	0.2019
NHSL2	0.56567	2.23607	2.80174	0.2019
NPFFR1	0.56567	2.23607	2.80174	0.2019
NYAP2	0.56567	2.23607	2.80174	0.2019
OAS1Z	0.56567	2.23607	2.80174	0.2019
OR4K5	0.56567	2.23607	2.80174	0.2019
OSM	0.56567	2.23607	2.80174	0.2019
OTOP2	0.56567	2.23607	2.80174	0.2019
OXCT2	0.56567	2.23607	2.80174	0.2019
P2RY2	0.56567	2.23607	2.80174	0.2019
P3H2	0.56567	2.23607	2.80174	0.2019
PIK3IP1	0.56567	2.23607	2.80174	0.2019
PLA2G4B	0.56567	2.23607	2.80174	0.2019
PLEKHF1	0.56567	2.23607	2.80174	0.2019
POU6F2	0.56567	2.23607	2.80174	0.2019
PRL	0.56567	2.23607	2.80174	0.2019
PRR9	0.56567	2.23607	2.80174	0.2019
PRRX2	0.56567	2.23607	2.80174	0.2019
PRSS46P	0.56567	2.23607	2.80174	0.2019
PTGER2	0.56567	2.23607	2.80174	0.2019
PTGR1	0.56567	2.23607	2.80174	0.2019
RS1	0.56567	2.23607	2.80174	0.2019
SCG2	0.56567	2.23607	2.80174	0.2019
45549	0.56567	2.23607	2.80174	0.2019
SGCA	0.56567	2.23607	2.80174	0.2019
SH2D1A	0.56567	2.23607	2.80174	0.2019
SLC1A6	0.56567	2.23607	2.80174	0.2019
SLC25A34	0.56567	2.23607	2.80174	0.2019
SLC34A3	0.56567	2.23607	2.80174	0.2019
SLC7A4	0.56567	2.23607	2.80174	0.2019
SLITRK4	0.56567	2.23607	2.80174	0.2019
SNX33	0.56567	2.23607	2.80174	0.2019
SPIN2B	0.56567	2.23607	2.80174	0.2019
SPSB4	0.56567	2.23607	2.80174	0.2019
SPTA1	0.56567	2.23607	2.80174	0.2019
TAAR3	0.56567	2.23607	2.80174	0.2019
TDO2	0.56567	2.23607	2.80174	0.2019
TGM6	0.56567	2.23607	2.80174	0.2019
TLR9	0.56567	2.23607	2.80174	0.2019
TMEM91	0.56567	2.23607	2.80174	0.2019
TNF	0.56567	2.23607	2.80174	0.2019
TRAPPC3L	0.56567	2.23607	2.80174	0.2019
TRIM46	0.56567	2.23607	2.80174	0.2019
TRIM63	0.56567	2.23607	2.80174	0.2019
TRPM3	0.56567	2.23607	2.80174	0.2019
TSPAN6	0.56567	2.23607	2.80174	0.2019
TYW3	0.56567	2.23607	2.80174	0.2019
UBAP1L	0.56567	2.23607	2.80174	0.2019
USP50	0.56567	2.23607	2.80174	0.2019
WC1.3	0.56567	2.23607	2.80174	0.2019
XPNPEP2	0.56567	2.23607	2.80174	0.2019
XYLT1	0.56567	2.23607	2.80174	0.2019
ZBTB47	0.56567	2.23607	2.80174	0.2019
ZDHHC22	0.56567	2.23607	2.80174	0.2019
ZNF316	0.56567	2.23607	2.80174	0.2019
ZNF488	0.56567	2.23607	2.80174	0.2019
ARHGAP15	0.565674	2.23607	2.80174	0.201901
ASB5	0.565674	2.23607	2.80174	0.201901
BEX2	0.565674	2.23607	2.80174	0.201901
C9	0.565674	2.23607	2.80174	0.201901
CATSPER1	0.565674	2.23607	2.80174	0.201901
CCDC102A	0.565674	2.23607	2.80174	0.201901
CCDC129	0.565674	2.23607	2.80174	0.201901
CHRNA4	0.565674	2.23607	2.80174	0.201901
CRISP2	0.565674	2.23607	2.80174	0.201901
CXHXorf65	0.565674	2.23607	2.80174	0.201901
CYP2B6	0.565674	2.23607	2.80174	0.201901
DCST1	0.565674	2.23607	2.80174	0.201901
DSC3	0.565674	2.23607	2.80174	0.201901
DUS2	0.565674	2.23607	2.80174	0.201901
EFCC1	0.565674	2.23607	2.80174	0.201901
FAM237A	0.565674	2.23607	2.80174	0.201901
FTMT	0.565674	2.23607	2.80174	0.201901
FUT4	0.565674	2.23607	2.80174	0.201901
G6PC	0.565674	2.23607	2.80174	0.201901
GADL1	0.565674	2.23607	2.80174	0.201901
GCNT2	0.565674	2.23607	2.80174	0.201901
HDC	0.565674	2.23607	2.80174	0.201901
HPGDS	0.565674	2.23607	2.80174	0.201901
IGF1	0.565674	2.23607	2.80174	0.201901
IGFBP1	0.565674	2.23607	2.80174	0.201901
IGFL1	0.565674	2.23607	2.80174	0.201901
KCNIP1	0.565674	2.23607	2.80174	0.201901
KLF8	0.565674	2.23607	2.80174	0.201901
KLK8	0.565674	2.23607	2.80174	0.201901
KRT23	0.565674	2.23607	2.80174	0.201901
KRT75	0.565674	2.23607	2.80174	0.201901
LAMC3	0.565674	2.23607	2.80174	0.201901
LCK	0.565674	2.23607	2.80174	0.201901
LOC100337185	0.565674	2.23607	2.80174	0.201901
LOC100847319	0.565674	2.23607	2.80174	0.201901
LOC100847677	0.565674	2.23607	2.80174	0.201901
LOC101902083	0.565674	2.23607	2.80174	0.201901
LOC101902552	0.565674	2.23607	2.80174	0.201901
LOC101902622	0.565674	2.23607	2.80174	0.201901
LOC101904044	0.565674	2.23607	2.80174	0.201901
LOC101904383	0.565674	2.23607	2.80174	0.201901
LOC101904397	0.565674	2.23607	2.80174	0.201901
LOC101907570	0.565674	2.23607	2.80174	0.201901
LOC101908051	0.565674	2.23607	2.80174	0.201901
LOC104970184	0.565674	2.23607	2.80174	0.201901
LOC104971180	0.565674	2.23607	2.80174	0.201901
LOC104972343	0.565674	2.23607	2.80174	0.201901
LOC104974667	0.565674	2.23607	2.80174	0.201901
LOC107131818	0.565674	2.23607	2.80174	0.201901
LOC107132852	0.565674	2.23607	2.80174	0.201901
LOC112441605	0.565674	2.23607	2.80174	0.201901
LOC112441876	0.565674	2.23607	2.80174	0.201901
LOC112442390	0.565674	2.23607	2.80174	0.201901
LOC112443412	0.565674	2.23607	2.80174	0.201901
LOC112443506	0.565674	2.23607	2.80174	0.201901
LOC112444279	0.565674	2.23607	2.80174	0.201901
LOC112444296	0.565674	2.23607	2.80174	0.201901
LOC112444326	0.565674	2.23607	2.80174	0.201901
LOC112444642	0.565674	2.23607	2.80174	0.201901
LOC112444727	0.565674	2.23607	2.80174	0.201901
LOC112445073	0.565674	2.23607	2.80174	0.201901
LOC112445089	0.565674	2.23607	2.80174	0.201901
LOC112445879	0.565674	2.23607	2.80174	0.201901
LOC112445977	0.565674	2.23607	2.80174	0.201901
LOC112446397	0.565674	2.23607	2.80174	0.201901
LOC112447066	0.565674	2.23607	2.80174	0.201901
LOC112447291	0.565674	2.23607	2.80174	0.201901
LOC112447321	0.565674	2.23607	2.80174	0.201901
LOC112447858	0.565674	2.23607	2.80174	0.201901
LOC112449066	0.565674	2.23607	2.80174	0.201901
LOC112449505	0.565674	2.23607	2.80174	0.201901
LOC112449615	0.565674	2.23607	2.80174	0.201901
LOC509922	0.565674	2.23607	2.80174	0.201901
LOC510362	0.565674	2.23607	2.80174	0.201901
LOC519161	0.565674	2.23607	2.80174	0.201901
LOC526163	0.565674	2.23607	2.80174	0.201901
LOC531038	0.565674	2.23607	2.80174	0.201901
LOC615237	0.565674	2.23607	2.80174	0.201901
LOC782261	0.565674	2.23607	2.80174	0.201901
LOC783920	0.565674	2.23607	2.80174	0.201901
LOC788723	0.565674	2.23607	2.80174	0.201901
LRCH2	0.565674	2.23607	2.80174	0.201901
LRRC4B	0.565674	2.23607	2.80174	0.201901
LRRC69	0.565674	2.23607	2.80174	0.201901
MMP3	0.565674	2.23607	2.80174	0.201901
MRGPRF	0.565674	2.23607	2.80174	0.201901
MSLN	0.565674	2.23607	2.80174	0.201901
MUC5AC	0.565674	2.23607	2.80174	0.201901
MX1	0.565674	2.23607	2.80174	0.201901
NEPN	0.565674	2.23607	2.80174	0.201901
NEU2	0.565674	2.23607	2.80174	0.201901
PNPO	0.565674	2.23607	2.80174	0.201901
PXDN	0.565674	2.23607	2.80174	0.201901
SAMD13	0.565674	2.23607	2.80174	0.201901
SBSN	0.565674	2.23607	2.80174	0.201901
SLC26A7	0.565674	2.23607	2.80174	0.201901
SRD5A1	0.565674	2.23607	2.80174	0.201901
SSMEM1	0.565674	2.23607	2.80174	0.201901
TFAP2E	0.565674	2.23607	2.80174	0.201901
THBS2	0.565674	2.23607	2.80174	0.201901
TM4SF4	0.565674	2.23607	2.80174	0.201901
TMEM98	0.565674	2.23607	2.80174	0.201901
TMPPE	0.565674	2.23607	2.80174	0.201901
TNNC1	0.565674	2.23607	2.80174	0.201901
UMODL1	0.565674	2.23607	2.80174	0.201901
UNC45B	0.565674	2.23607	2.80174	0.201901
UPK2	0.565674	2.23607	2.80174	0.201901
VNN2	0.565674	2.23607	2.80174	0.201901
WNT11	0.565674	2.23607	2.80174	0.201901
ZNF285	0.565674	2.23607	2.80174	0.201901
ANKRD1	0.565676	2.23607	2.80174	0.201901
ANKRD2	0.565676	2.23607	2.80174	0.201901
AQP5	0.565676	2.23607	2.80174	0.201901
AREG	0.565676	2.23607	2.80174	0.201901
ASGR2	0.565676	2.23607	2.80174	0.201901
BCL2A1	0.565676	2.23607	2.80174	0.201901
CBLC	0.565676	2.23607	2.80174	0.201901
CCR3	0.565676	2.23607	2.80174	0.201901
CD38	0.565676	2.23607	2.80174	0.201901
CDH20	0.565676	2.23607	2.80174	0.201901
CHRNB2	0.565676	2.23607	2.80174	0.201901
CLDN14	0.565676	2.23607	2.80174	0.201901
DNAJC12	0.565676	2.23607	2.80174	0.201901
FUT6	0.565676	2.23607	2.80174	0.201901
HEBP2	0.565676	2.23607	2.80174	0.201901
HEPHL1	0.565676	2.23607	2.80174	0.201901
HTR1B	0.565676	2.23607	2.80174	0.201901
HTR3C	0.565676	2.23607	2.80174	0.201901
IFI27	0.565676	2.23607	2.80174	0.201901
IFI44L	0.565676	2.23607	2.80174	0.201901
IFNB1	0.565676	2.23607	2.80174	0.201901
IL2RB	0.565676	2.23607	2.80174	0.201901
IL31RA	0.565676	2.23607	2.80174	0.201901
JPH3	0.565676	2.23607	2.80174	0.201901
LOC100849762	0.565676	2.23607	2.80174	0.201901
LOC101902458	0.565676	2.23607	2.80174	0.201901
LOC101904266	0.565676	2.23607	2.80174	0.201901
LOC101905403	0.565676	2.23607	2.80174	0.201901
LOC101905723	0.565676	2.23607	2.80174	0.201901
LOC101906656	0.565676	2.23607	2.80174	0.201901
LOC101906730	0.565676	2.23607	2.80174	0.201901
LOC104970076	0.565676	2.23607	2.80174	0.201901
LOC104971683	0.565676	2.23607	2.80174	0.201901
LOC104973175	0.565676	2.23607	2.80174	0.201901
LOC104976009	0.565676	2.23607	2.80174	0.201901
LOC107131694	0.565676	2.23607	2.80174	0.201901
LOC107132740	0.565676	2.23607	2.80174	0.201901
LOC112441819	0.565676	2.23607	2.80174	0.201901
LOC112441989	0.565676	2.23607	2.80174	0.201901
LOC112442377	0.565676	2.23607	2.80174	0.201901
LOC112442539	0.565676	2.23607	2.80174	0.201901
LOC112443223	0.565676	2.23607	2.80174	0.201901
LOC112443788	0.565676	2.23607	2.80174	0.201901
LOC112444625	0.565676	2.23607	2.80174	0.201901
LOC112444769	0.565676	2.23607	2.80174	0.201901
LOC112444907	0.565676	2.23607	2.80174	0.201901
LOC112445870	0.565676	2.23607	2.80174	0.201901
LOC112446712	0.565676	2.23607	2.80174	0.201901
LOC112447436	0.565676	2.23607	2.80174	0.201901
LOC112449261	0.565676	2.23607	2.80174	0.201901
LOC112449521	0.565676	2.23607	2.80174	0.201901
LOC511175	0.565676	2.23607	2.80174	0.201901
LOC518495	0.565676	2.23607	2.80174	0.201901
LOC520237	0.565676	2.23607	2.80174	0.201901
LOC526230	0.565676	2.23607	2.80174	0.201901
LOC526700	0.565676	2.23607	2.80174	0.201901
LOC539382	0.565676	2.23607	2.80174	0.201901
LOC540707	0.565676	2.23607	2.80174	0.201901
LOC616190	0.565676	2.23607	2.80174	0.201901
LOC785149	0.565676	2.23607	2.80174	0.201901
LY6H	0.565676	2.23607	2.80174	0.201901
MAGED2	0.565676	2.23607	2.80174	0.201901
MAP6	0.565676	2.23607	2.80174	0.201901
MC2R	0.565676	2.23607	2.80174	0.201901
NDNF	0.565676	2.23607	2.80174	0.201901
NECTIN4	0.565676	2.23607	2.80174	0.201901
PI16	0.565676	2.23607	2.80174	0.201901
PRLHR	0.565676	2.23607	2.80174	0.201901
PRSS50	0.565676	2.23607	2.80174	0.201901
REP15	0.565676	2.23607	2.80174	0.201901
RSAD1	0.565676	2.23607	2.80174	0.201901
SCARA3	0.565676	2.23607	2.80174	0.201901
SH3D21	0.565676	2.23607	2.80174	0.201901
STAB1	0.565676	2.23607	2.80174	0.201901
SULT1B1	0.565676	2.23607	2.80174	0.201901
TMCO5B	0.565676	2.23607	2.80174	0.201901
TMEM114	0.565676	2.23607	2.80174	0.201901
TRIM47	0.565676	2.23607	2.80174	0.201901
TTLL2	0.565676	2.23607	2.80174	0.201901
ARNTL2	0.565678	2.23607	2.80175	0.201902
BOLA-DQB	0.565678	2.23607	2.80175	0.201902
C3H1orf87	0.565678	2.23607	2.80175	0.201902
CARD6	0.565678	2.23607	2.80175	0.201902
CMKLR1	0.565678	2.23607	2.80175	0.201902
COLEC10	0.565678	2.23607	2.80175	0.201902
CTSS	0.565678	2.23607	2.80175	0.201902
CTXND1	0.565678	2.23607	2.80175	0.201902
DACH1	0.565678	2.23607	2.80175	0.201902
DCN	0.565678	2.23607	2.80175	0.201902
GABRA2	0.565678	2.23607	2.80175	0.201902
IL1RL1	0.565678	2.23607	2.80175	0.201902
KIF1A	0.565678	2.23607	2.80175	0.201902
KRT76	0.565678	2.23607	2.80175	0.201902
LOC100138998	0.565678	2.23607	2.80175	0.201902
LOC100139764	0.565678	2.23607	2.80175	0.201902
LOC100140261	0.565678	2.23607	2.80175	0.201902
LOC100298064	0.565678	2.23607	2.80175	0.201902
LOC100847561	0.565678	2.23607	2.80175	0.201902
LOC100848689	0.565678	2.23607	2.80175	0.201902
LOC101901937	0.565678	2.23607	2.80175	0.201902
LOC101902831	0.565678	2.23607	2.80175	0.201902
LOC101907330	0.565678	2.23607	2.80175	0.201902
LOC104968488	0.565678	2.23607	2.80175	0.201902
LOC104968724	0.565678	2.23607	2.80175	0.201902
LOC104973122	0.565678	2.23607	2.80175	0.201902
LOC104974912	0.565678	2.23607	2.80175	0.201902
LOC107132537	0.565678	2.23607	2.80175	0.201902
LOC107132787	0.565678	2.23607	2.80175	0.201902
LOC112443417	0.565678	2.23607	2.80175	0.201902
LOC112446693	0.565678	2.23607	2.80175	0.201902
LOC112447492	0.565678	2.23607	2.80175	0.201902
LOC522763	0.565678	2.23607	2.80175	0.201902
LOC530348	0.565678	2.23607	2.80175	0.201902
LOC539064	0.565678	2.23607	2.80175	0.201902
LOC613699	0.565678	2.23607	2.80175	0.201902
LOC617417	0.565678	2.23607	2.80175	0.201902
LOC787088	0.565678	2.23607	2.80175	0.201902
LOC789317	0.565678	2.23607	2.80175	0.201902
LUM	0.565678	2.23607	2.80175	0.201902
MUC19	0.565678	2.23607	2.80175	0.201902
OR52I2	0.565678	2.23607	2.80175	0.201902
OTOG	0.565678	2.23607	2.80175	0.201902
PEAR1	0.565678	2.23607	2.80175	0.201902
PNLIP	0.565678	2.23607	2.80175	0.201902
RGS13	0.565678	2.23607	2.80175	0.201902
SCN2B	0.565678	2.23607	2.80175	0.201902
SMCO1	0.565678	2.23607	2.80175	0.201902
SMPDL3A	0.565678	2.23607	2.80175	0.201902
STOML3	0.565678	2.23607	2.80175	0.201902
TACR1	0.565678	2.23607	2.80175	0.201902
TMEM130	0.565678	2.23607	2.80175	0.201902
UBQLN3	0.565678	2.23607	2.80175	0.201902
VTCN1	0.565678	2.23607	2.80175	0.201902
AASS	0.565679	2.23607	2.80175	0.201902
ALB	0.565679	2.23607	2.80175	0.201902
CCDC178	0.565679	2.23607	2.80175	0.201902
CHAC2	0.565679	2.23607	2.80175	0.201902
CL43	0.565679	2.23607	2.80175	0.201902
CNGB3	0.565679	2.23607	2.80175	0.201902
ENTPD1	0.565679	2.23607	2.80175	0.201902
GRXCR2	0.565679	2.23607	2.80175	0.201902
GZMK	0.565679	2.23607	2.80175	0.201902
IFNAR2	0.565679	2.23607	2.80175	0.201902
LOC101904548	0.565679	2.23607	2.80175	0.201902
LOC104970977	0.565679	2.23607	2.80175	0.201902
LOC104972363	0.565679	2.23607	2.80175	0.201902
LOC107131547	0.565679	2.23607	2.80175	0.201902
LOC107132843	0.565679	2.23607	2.80175	0.201902
LOC107132938	0.565679	2.23607	2.80175	0.201902
LOC112444646	0.565679	2.23607	2.80175	0.201902
LOC112447497	0.565679	2.23607	2.80175	0.201902
LOC518911	0.565679	2.23607	2.80175	0.201902
LOC522334	0.565679	2.23607	2.80175	0.201902
LOC617565	0.565679	2.23607	2.80175	0.201902
LOC781895	0.565679	2.23607	2.80175	0.201902
LRRC56	0.565679	2.23607	2.80175	0.201902
MLC1	0.565679	2.23607	2.80175	0.201902
NAGS	0.565679	2.23607	2.80175	0.201902
NRP1	0.565679	2.23607	2.80175	0.201902
NUGGC	0.565679	2.23607	2.80175	0.201902
SERPINB10	0.565679	2.23607	2.80175	0.201902
SLC34A2	0.565679	2.23607	2.80175	0.201902
STX19	0.565679	2.23607	2.80175	0.201902
VN1R1	0.565679	2.23607	2.80175	0.201902
ATP2A3	0.56568	2.23607	2.80175	0.201902
BERV-K1	0.56568	2.23607	2.80175	0.201902
FAM167A	0.56568	2.23607	2.80175	0.201902
GJB3	0.56568	2.23607	2.80175	0.201902
HSD3B7	0.56568	2.23607	2.80175	0.201902
ITGB2	0.56568	2.23607	2.80175	0.201902
KCNS2	0.56568	2.23607	2.80175	0.201902
KLK10	0.56568	2.23607	2.80175	0.201902
LDHAL6B	0.56568	2.23607	2.80175	0.201902
LOC100847365	0.56568	2.23607	2.80175	0.201902
LOC101905600	0.56568	2.23607	2.80175	0.201902
LOC107132417	0.56568	2.23607	2.80175	0.201902
LOC107133304	0.56568	2.23607	2.80175	0.201902
LOC112442614	0.56568	2.23607	2.80175	0.201902
LOC112446363	0.56568	2.23607	2.80175	0.201902
LOC532022	0.56568	2.23607	2.80175	0.201902
OVGP1	0.56568	2.23607	2.80175	0.201902
PLPPR4	0.56568	2.23607	2.80175	0.201902
PPYR1	0.56568	2.23607	2.80175	0.201902
PYROXD2	0.56568	2.23607	2.80175	0.201902
RASSF2	0.56568	2.23607	2.80175	0.201902
RTP3	0.56568	2.23607	2.80175	0.201902
SHC3	0.56568	2.23607	2.80175	0.201902
TFEC	0.56568	2.23607	2.80175	0.201902
TMC3	0.56568	2.23607	2.80175	0.201902
TYRP1	0.56568	2.23607	2.80175	0.201902
CTSK	0.56568	2.23607	2.80175	0.201903
DUSP27	0.56568	2.23607	2.80175	0.201903
GPR82	0.56568	2.23607	2.80175	0.201903
GYG2	0.56568	2.23607	2.80175	0.201903
KRT24	0.56568	2.23607	2.80175	0.201903
LGALS3BP	0.56568	2.23607	2.80175	0.201903
LOC104975213	0.56568	2.23607	2.80175	0.201903
LOC112441652	0.56568	2.23607	2.80175	0.201903
LOC112441847	0.56568	2.23607	2.80175	0.201903
LOC112442995	0.56568	2.23607	2.80175	0.201903
LOC512440	0.56568	2.23607	2.80175	0.201903
SERPINB7	0.56568	2.23607	2.80175	0.201903
SLC13A4	0.56568	2.23607	2.80175	0.201903
CHD5	0.565681	2.23607	2.80175	0.201903
CRYBA1	0.565681	2.23607	2.80175	0.201903
FGA	0.565681	2.23607	2.80175	0.201903
LOC112449102	0.565681	2.23607	2.80175	0.201903
LOC617695	0.565681	2.23607	2.80175	0.201903
LOC782251	0.565681	2.23607	2.80175	0.201903
PIFO	0.565681	2.23607	2.80175	0.201903
SLC22A3	0.565681	2.23607	2.80175	0.201903
SPHKAP	0.565681	2.23607	2.80175	0.201903
ACSM5	0.565681	2.23607	2.80175	0.201903
CALHM4	0.565681	2.23607	2.80175	0.201903
CSMD3	0.565681	2.23607	2.80175	0.201903
FGF7	0.565681	2.23607	2.80175	0.201903
HEPACAM	0.565681	2.23607	2.80175	0.201903
HERC6	0.565681	2.23607	2.80175	0.201903
LOC100848419	0.565681	2.23607	2.80175	0.201903
LOC112448384	0.565681	2.23607	2.80175	0.201903
LOC788394	0.565681	2.23607	2.80175	0.201903
RPTN	0.565681	2.23607	2.80175	0.201903
TAAR2	0.565681	2.23607	2.80175	0.201903
TIGIT	0.565681	2.23607	2.80175	0.201903
TRARG1	0.565681	2.23607	2.80175	0.201903
TRIM7	0.565681	2.23607	2.80175	0.201903
CCKAR	0.565682	2.23607	2.80175	0.201903
COL3A1	0.565682	2.23607	2.80175	0.201903
KIF28	0.565682	2.23607	2.80175	0.201903
LOC101907893	0.565682	2.23607	2.80175	0.201903
LOC104973850	0.565682	2.23607	2.80175	0.201903
LOC104974812	0.565682	2.23607	2.80175	0.201903
RASSF6	0.565682	2.23607	2.80175	0.201903
LOC104972815	0.565682	2.23607	2.80175	0.201903
LOC112449072	0.565682	2.23607	2.80175	0.201903
HAO2	0.565682	2.23607	2.80175	0.201903
VCAM1	0.565682	2.23607	2.80175	0.201903
VXN	0.565682	2.23607	2.80175	0.201903
LOC104975774	0.565682	2.23607	2.80175	0.201903
LOC112449103	0.565682	2.23607	2.80175	0.201903
TLR6	0.565682	2.23607	2.80175	0.201903
FAM46D	0.565683	2.23607	2.80175	0.201903
LOC100337022	0.565683	2.23607	2.80175	0.201903
PRLR	0.565683	2.23607	2.80175	0.201903
EVA1A	0.565683	2.23607	2.80175	0.201903
ERMN	0.565683	2.23607	2.80175	0.201904
LOC112446717	0.565683	2.23607	2.80175	0.201904
KLHL14	0.37338	1.42878	1.80216	0.207184
DCUN1D5	0.209213	0.796036	1.00525	0.20812
ZFAND6	0.244985	0.920254	1.16524	0.210245
LOC107132532	0.368758	1.37337	1.74213	0.211671
PRIMPOL	0.218753	0.811219	1.02997	0.212387
[truncated: 17,250 more rows]
