# Supplementary material for: Early transcriptional divergence underlies cell fate bias in bovine embryos
Source: bioRxiv preprint, doi:10.1101/2025.07.01.661069, version 1 (2025-07-03)
Supplement: Supplemental Legend [file 661069_file11.docx]

**Supplementary legend**

Supplementary Figure 1. KEGG pathway enrichment analysis of genes with high SSwe/SS values at the 2-cell and 4-cell stages.
