# Supplementary material for: Early transcriptional divergence underlies cell fate bias in bovine embryos
Source: bioRxiv preprint, doi:10.1101/2025.07.01.661069, version 1 (2025-07-03)
Supplement: Supplemental Table 1 [file 661069_file10.docx]

Supplementary Table 3. Differentially expressed genes (DEGs) between the smallest and largest blastomeres at the 4-cell and 8-cell stages.
